# Supplementary material for: Genome dynamics of the human embryonic kidney 293 lineage in response to cell biology manipulations
Source: PubMed Central journal article supplement — Nat Commun. 2014 Sep 3;5:4767. doi: 10.1038/ncomms5767 (PMC4166678; doi:10.1038/ncomms5767), 2014-09-03

## Supplementary Data 7: Overview of plasmid insertion sites

Each page presents an overview of the detected plasmid-genome junction sites for each individual plasmid sequence, over the whole human genome (hg18). Junction defining read density is calculated per 100 kbp window. The candidate junctions were highlighted with red rectangle boxes.

Detailed description of the overview plasmid insertion reads density plots (reads/100kbp):

- Page 2: 293 reads mapping to the hg18 and to the full-length of adenovirus (Ad5) sequence.
- Page 3: 293 reads mapping to the hg18 and to the part of the Ad5 sequence containing mapped reads from 293 data (except the low complexity Ad5 sequence).
- Page 4: 293T reads mapping to the hg18 and SV40 T sequence.
- Page 5: 293FTM reads (unfiltered) mapping to the hg18 and pFRT/lacZeo plasmid sequence.
- Page 6: 293FTM reads that map on a unique position of the hg18 and map to pFRT/lacZeo plasmid sequence.
- Page 7: 293FTM reads (unfiltered) mapping to the hg18 and pcDNA6/TR plasmid sequence.
- Page 8: 293FTM reads that map on a unique position of the hg18 and map to pcDNA6/TR plasmid sequence.
- Page 9: 293FTM reads (unfiltered) mapping to the hg18 and pXPX2d2-rPAP1-luci plasmid sequence.
- Page 10: 293FTM reads that map on a unique position of the hg18 and map to pXPX2d2-rPAP1-luci plasmid sequence.
- Page 11: 293FTM reads (unfiltered) mapping to the hg18 and pM5neo-mEcoR plasmid sequence.
- Page 12: 293FTM reads that map on a unique position of the hg18 and map to pM5neo-mEcoR plasmid sequence.
- Page 13: 293SG reads (unfiltered) mapping to the hg18 and pcDNA6/TR plasmid sequence.
- Page 14: 293SG reads that map on a unique position of the hg18 and map to pcDNA6/TR plasmid sequence.
- Page 15: 293SGGD reads (unfiltered) mapping to the hg18 and pcDNA6/TR plasmid sequence.
- Page 16: 293SGGD reads (unfiltered) mapping to the hg18 and pcDNA3.1-zeo-STendoT plasmid sequence.
- Page 17: 293SGGD reads that map on a unique position of the hg18 and map to pcDNA3.1-zeo-STendoT plasmid sequence.

# 293 adenovirus

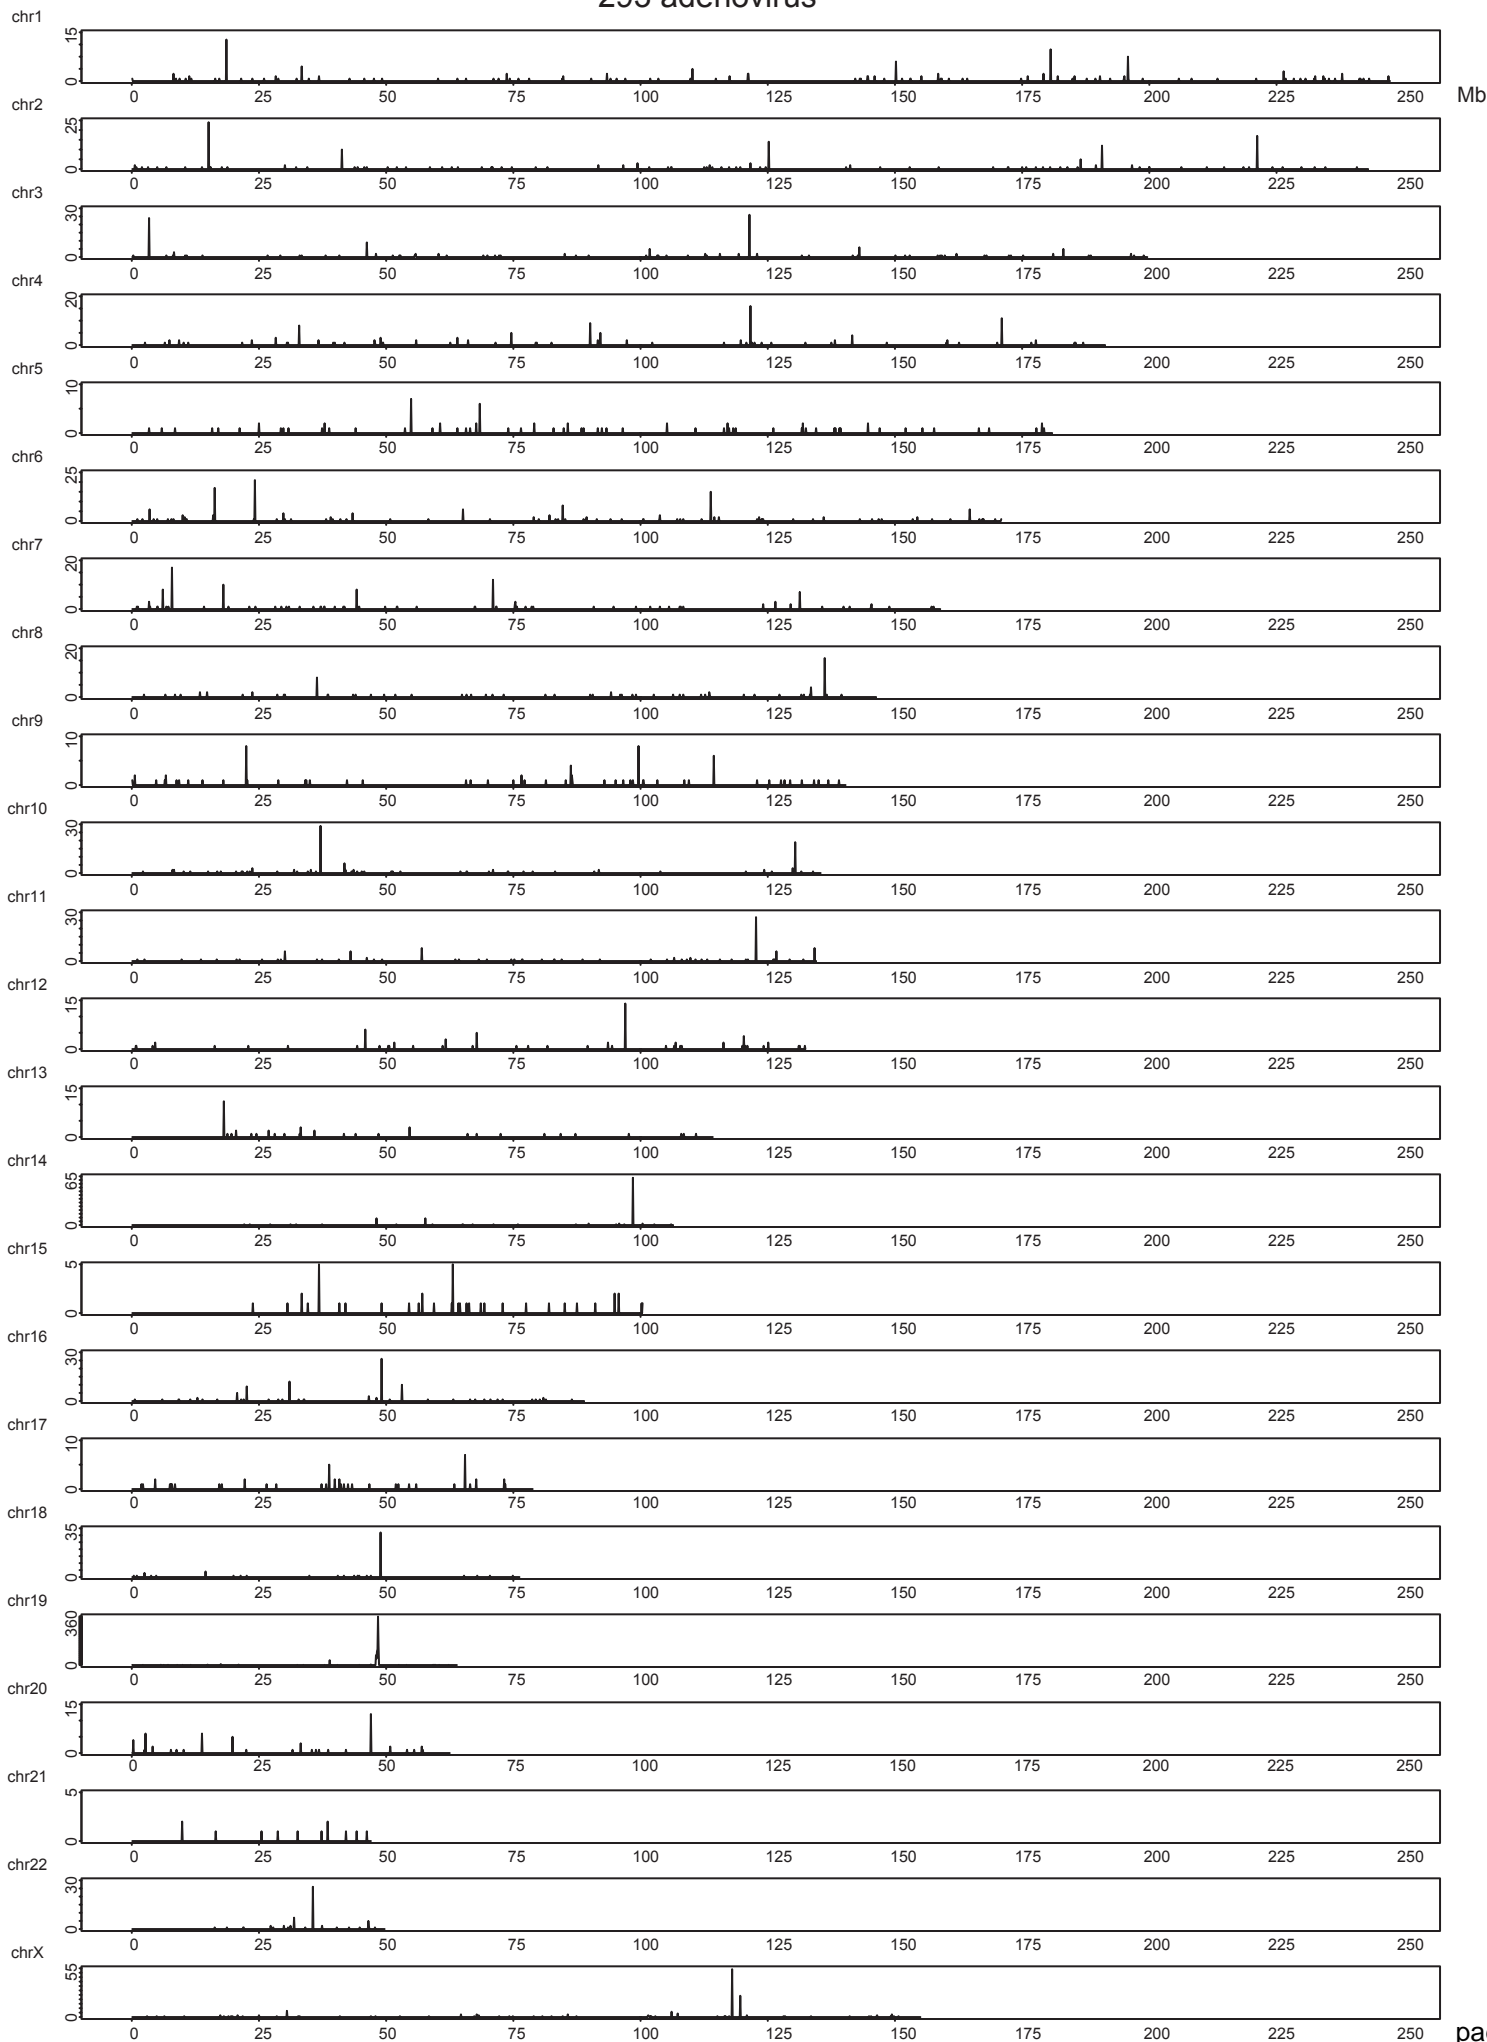

Mb

# 293 adenovirus

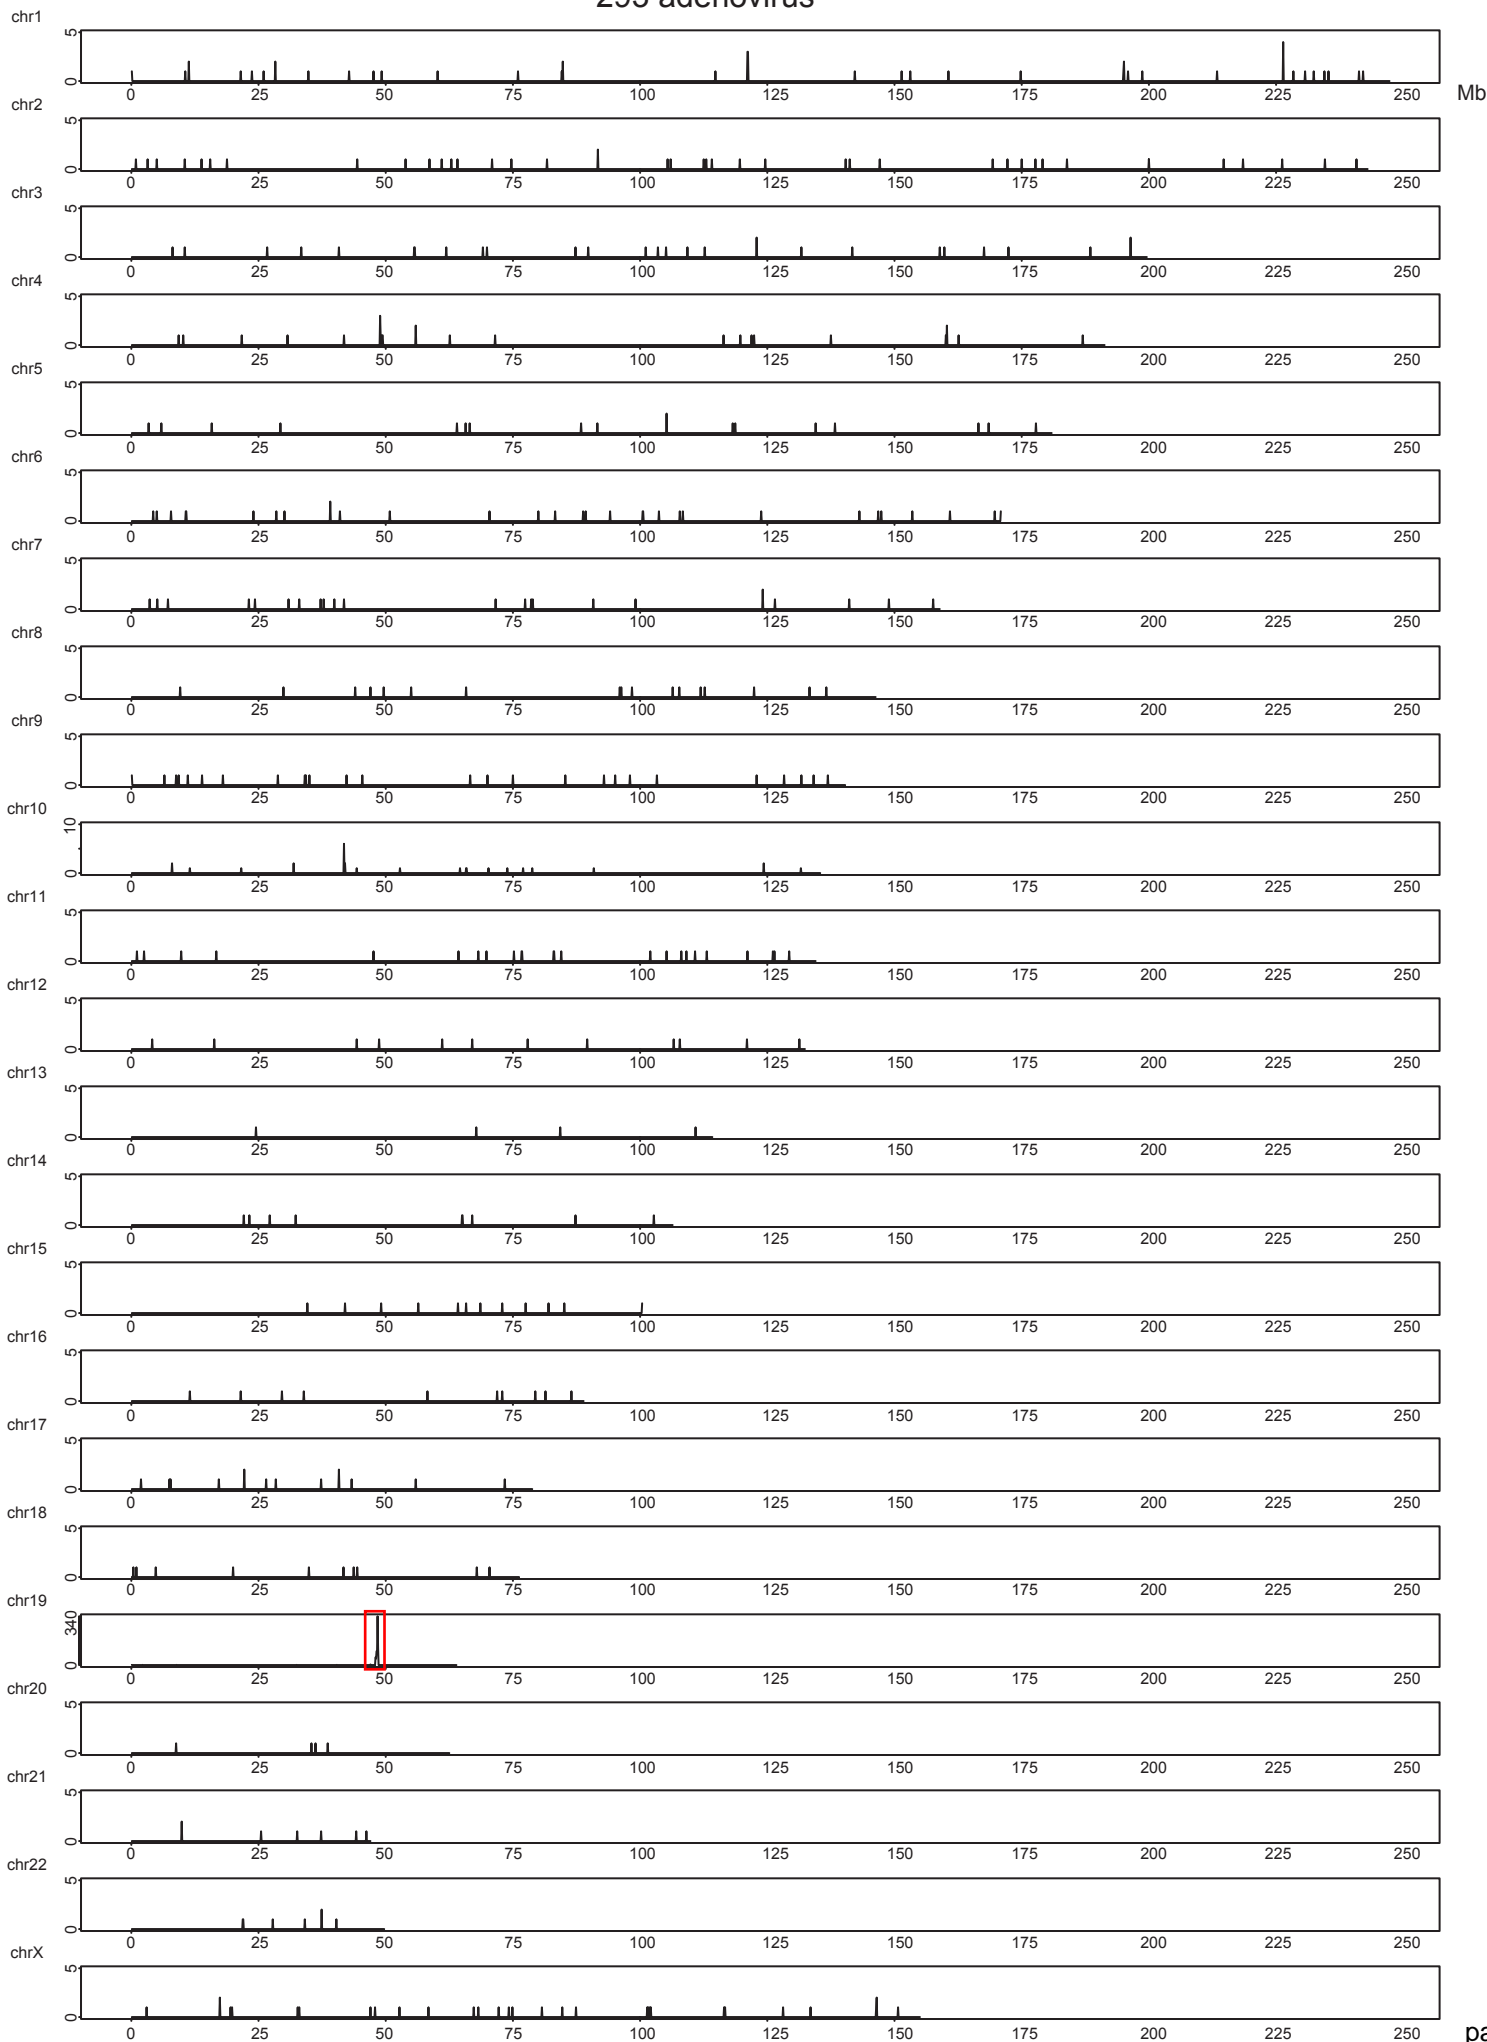

Mb

# 293T SV40 T plasmid

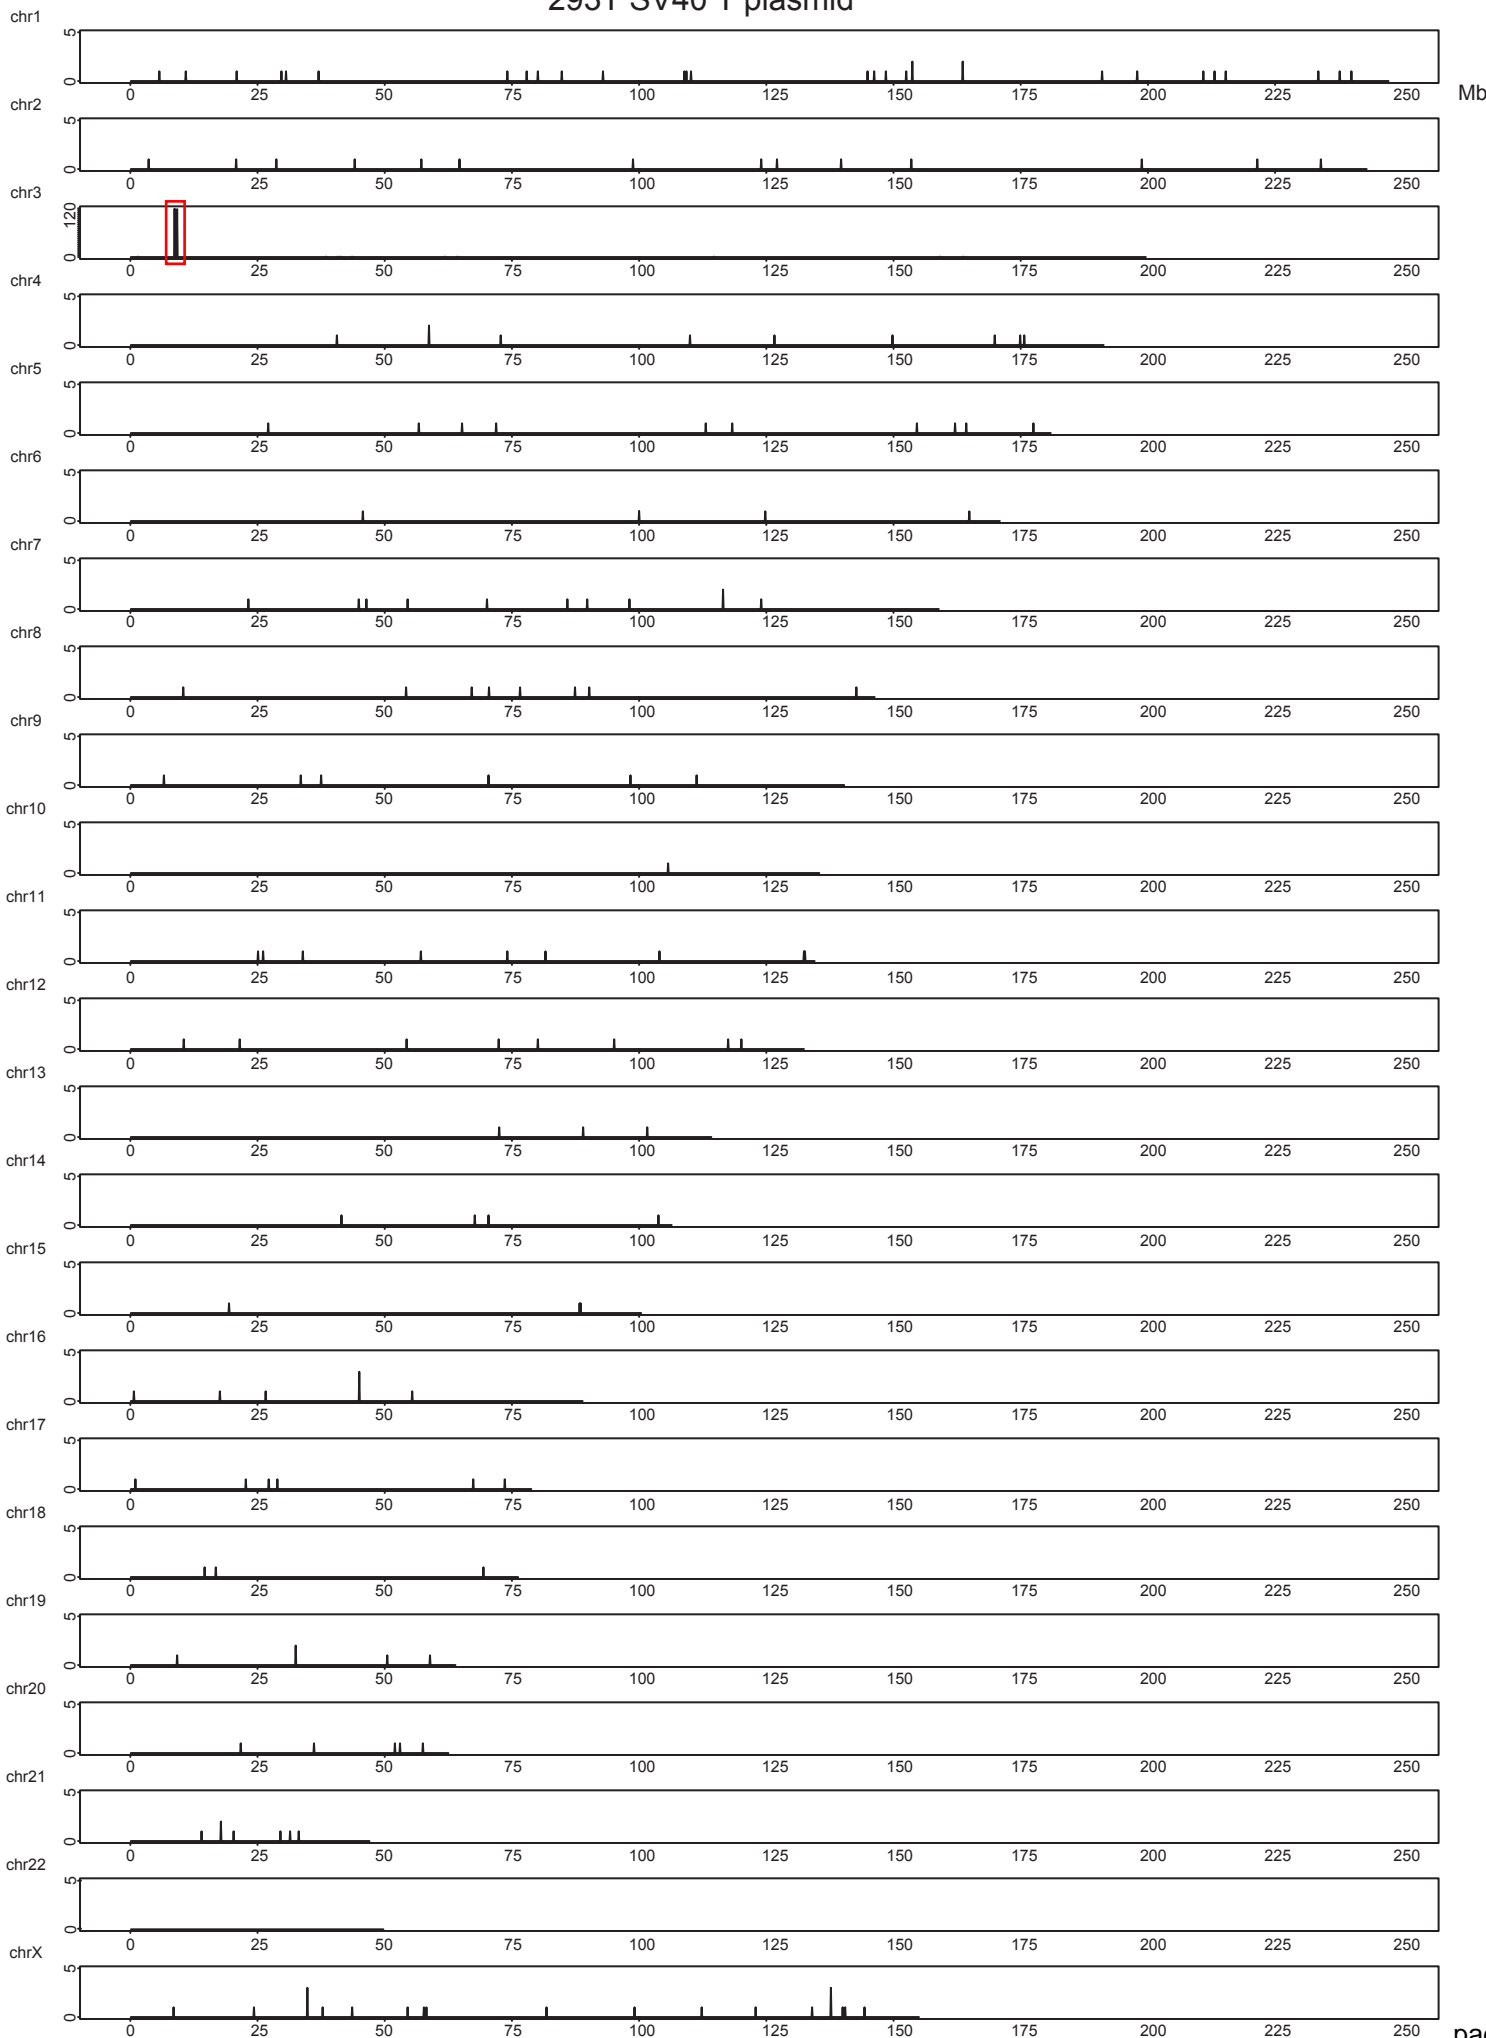

Mb

# 293FTM pFRT/lacZeo

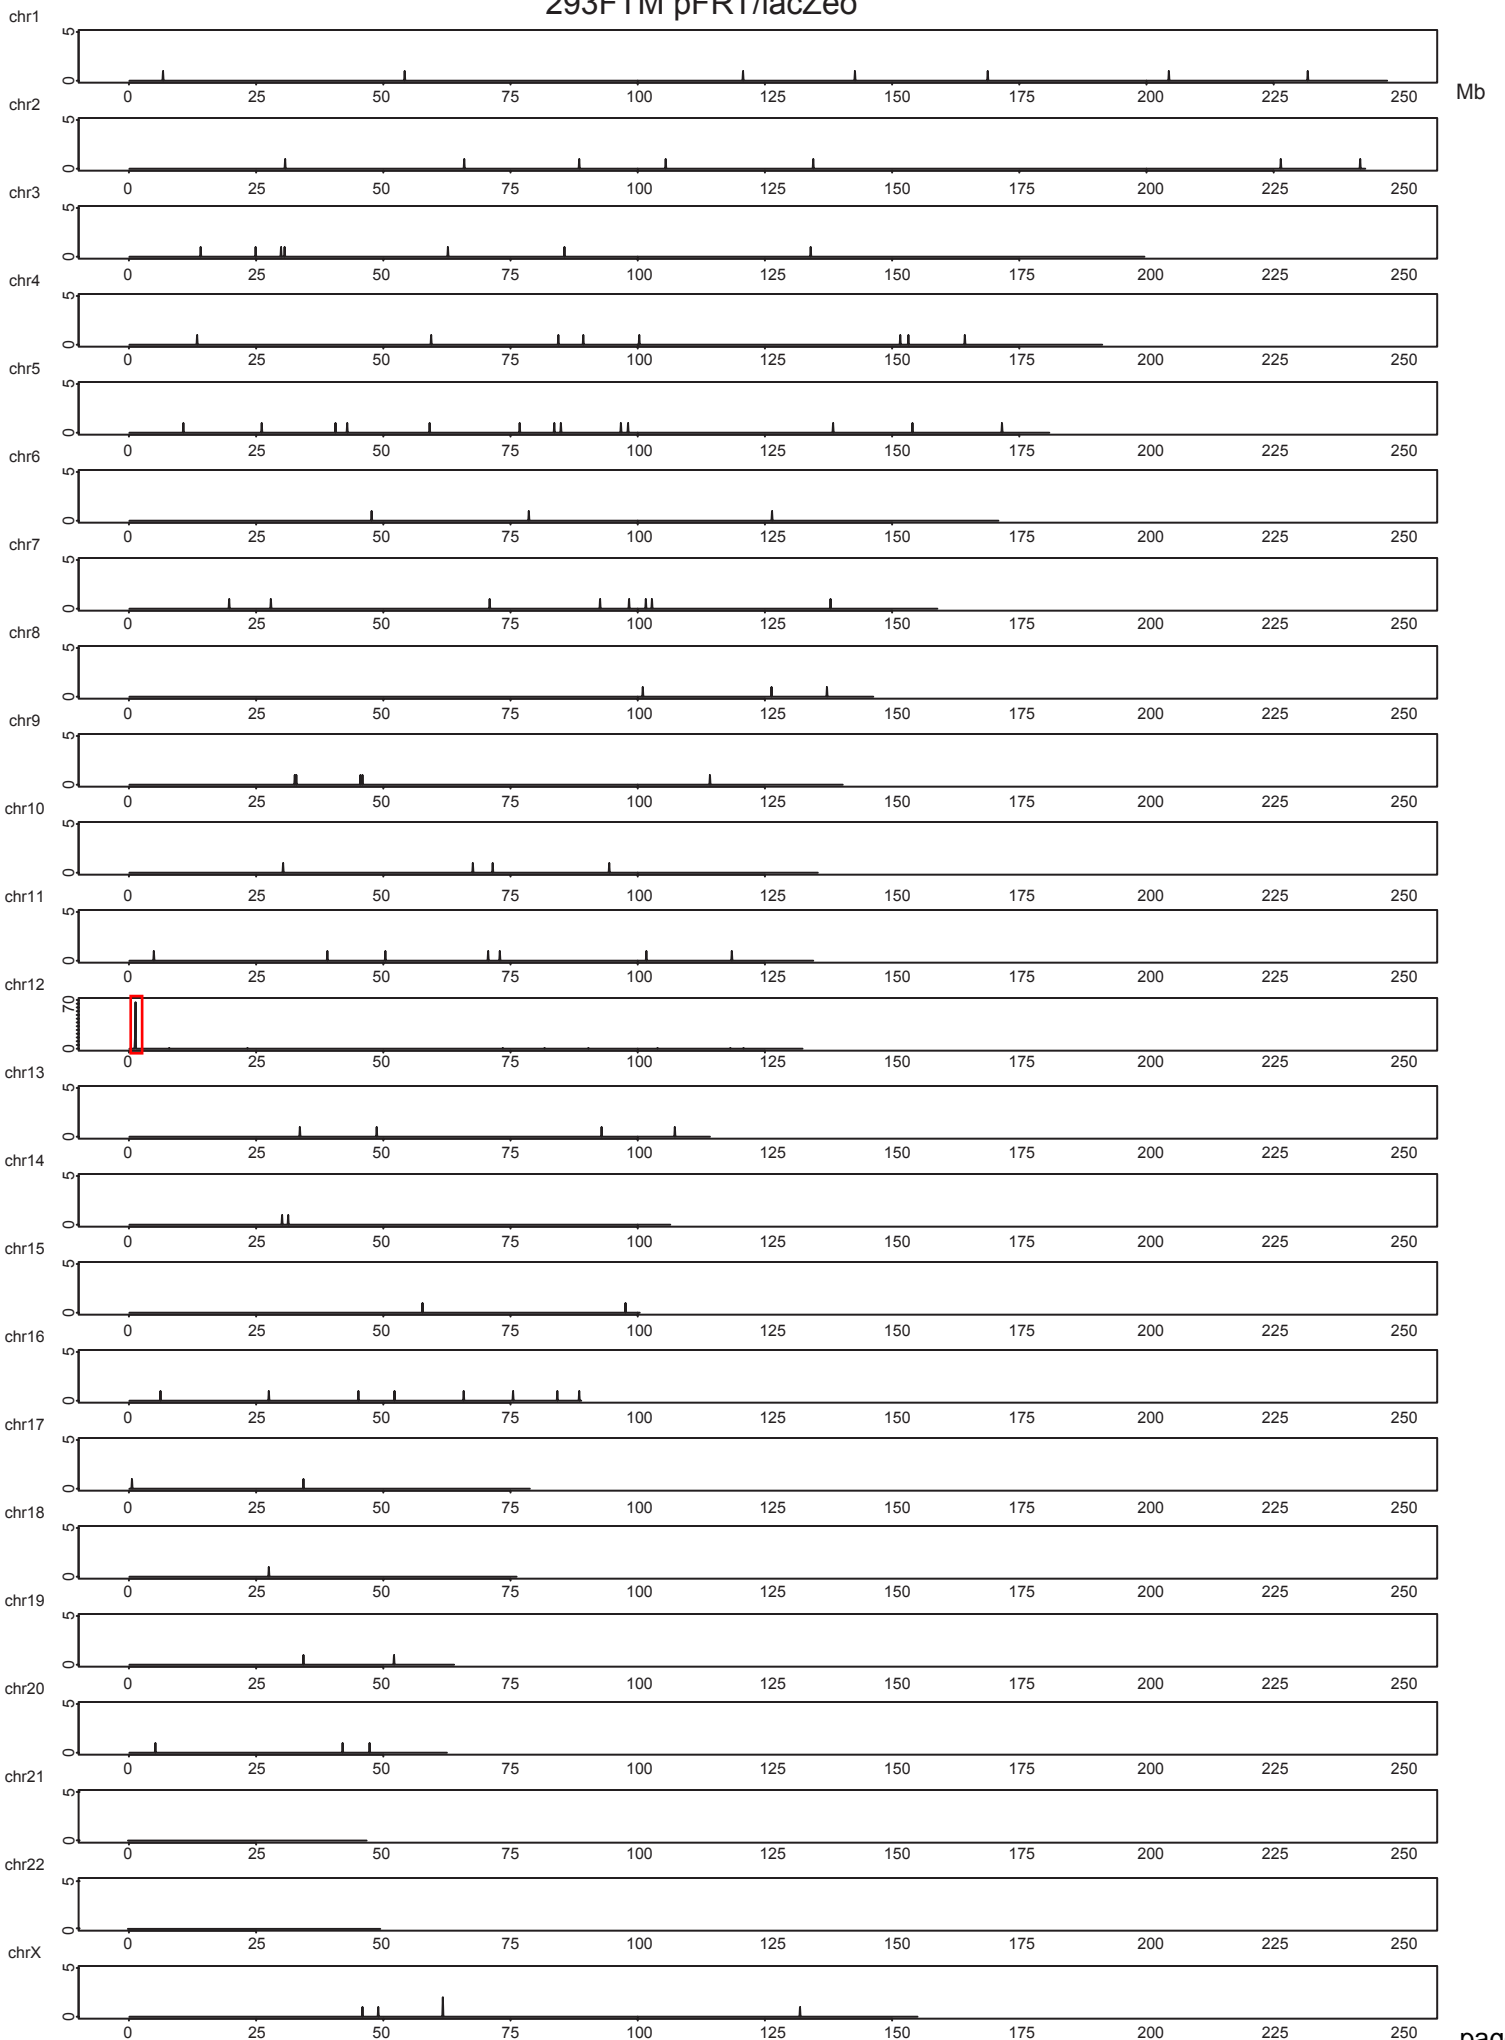

Mb

# 293FTM pFRT/lacZeo

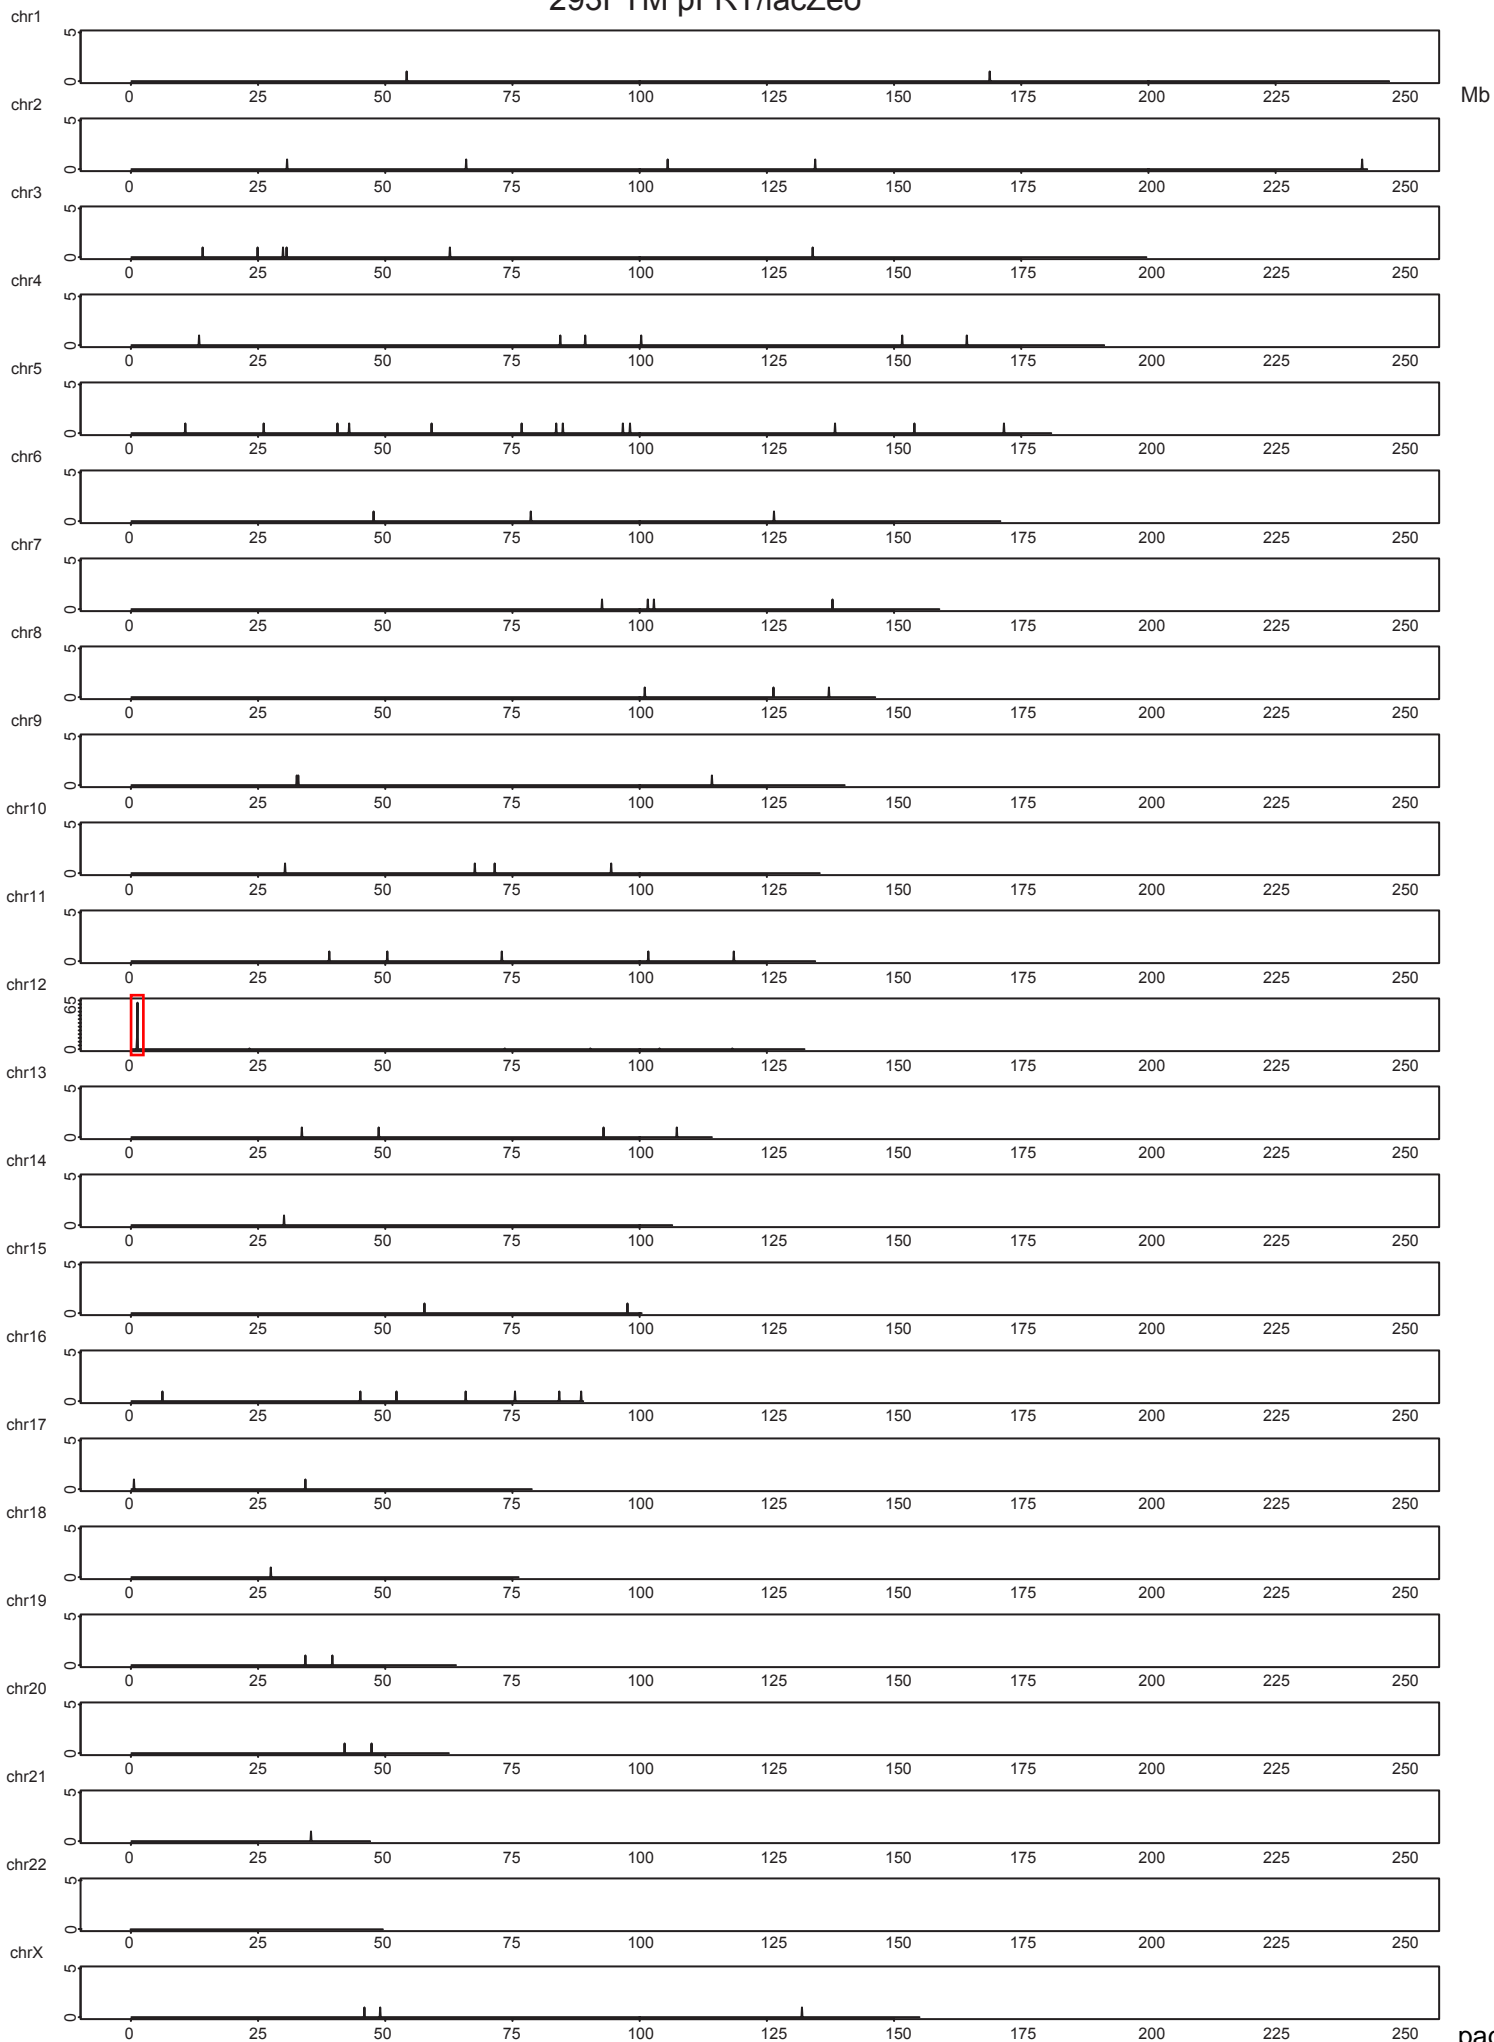

# 293FTM pcDNA6/TR

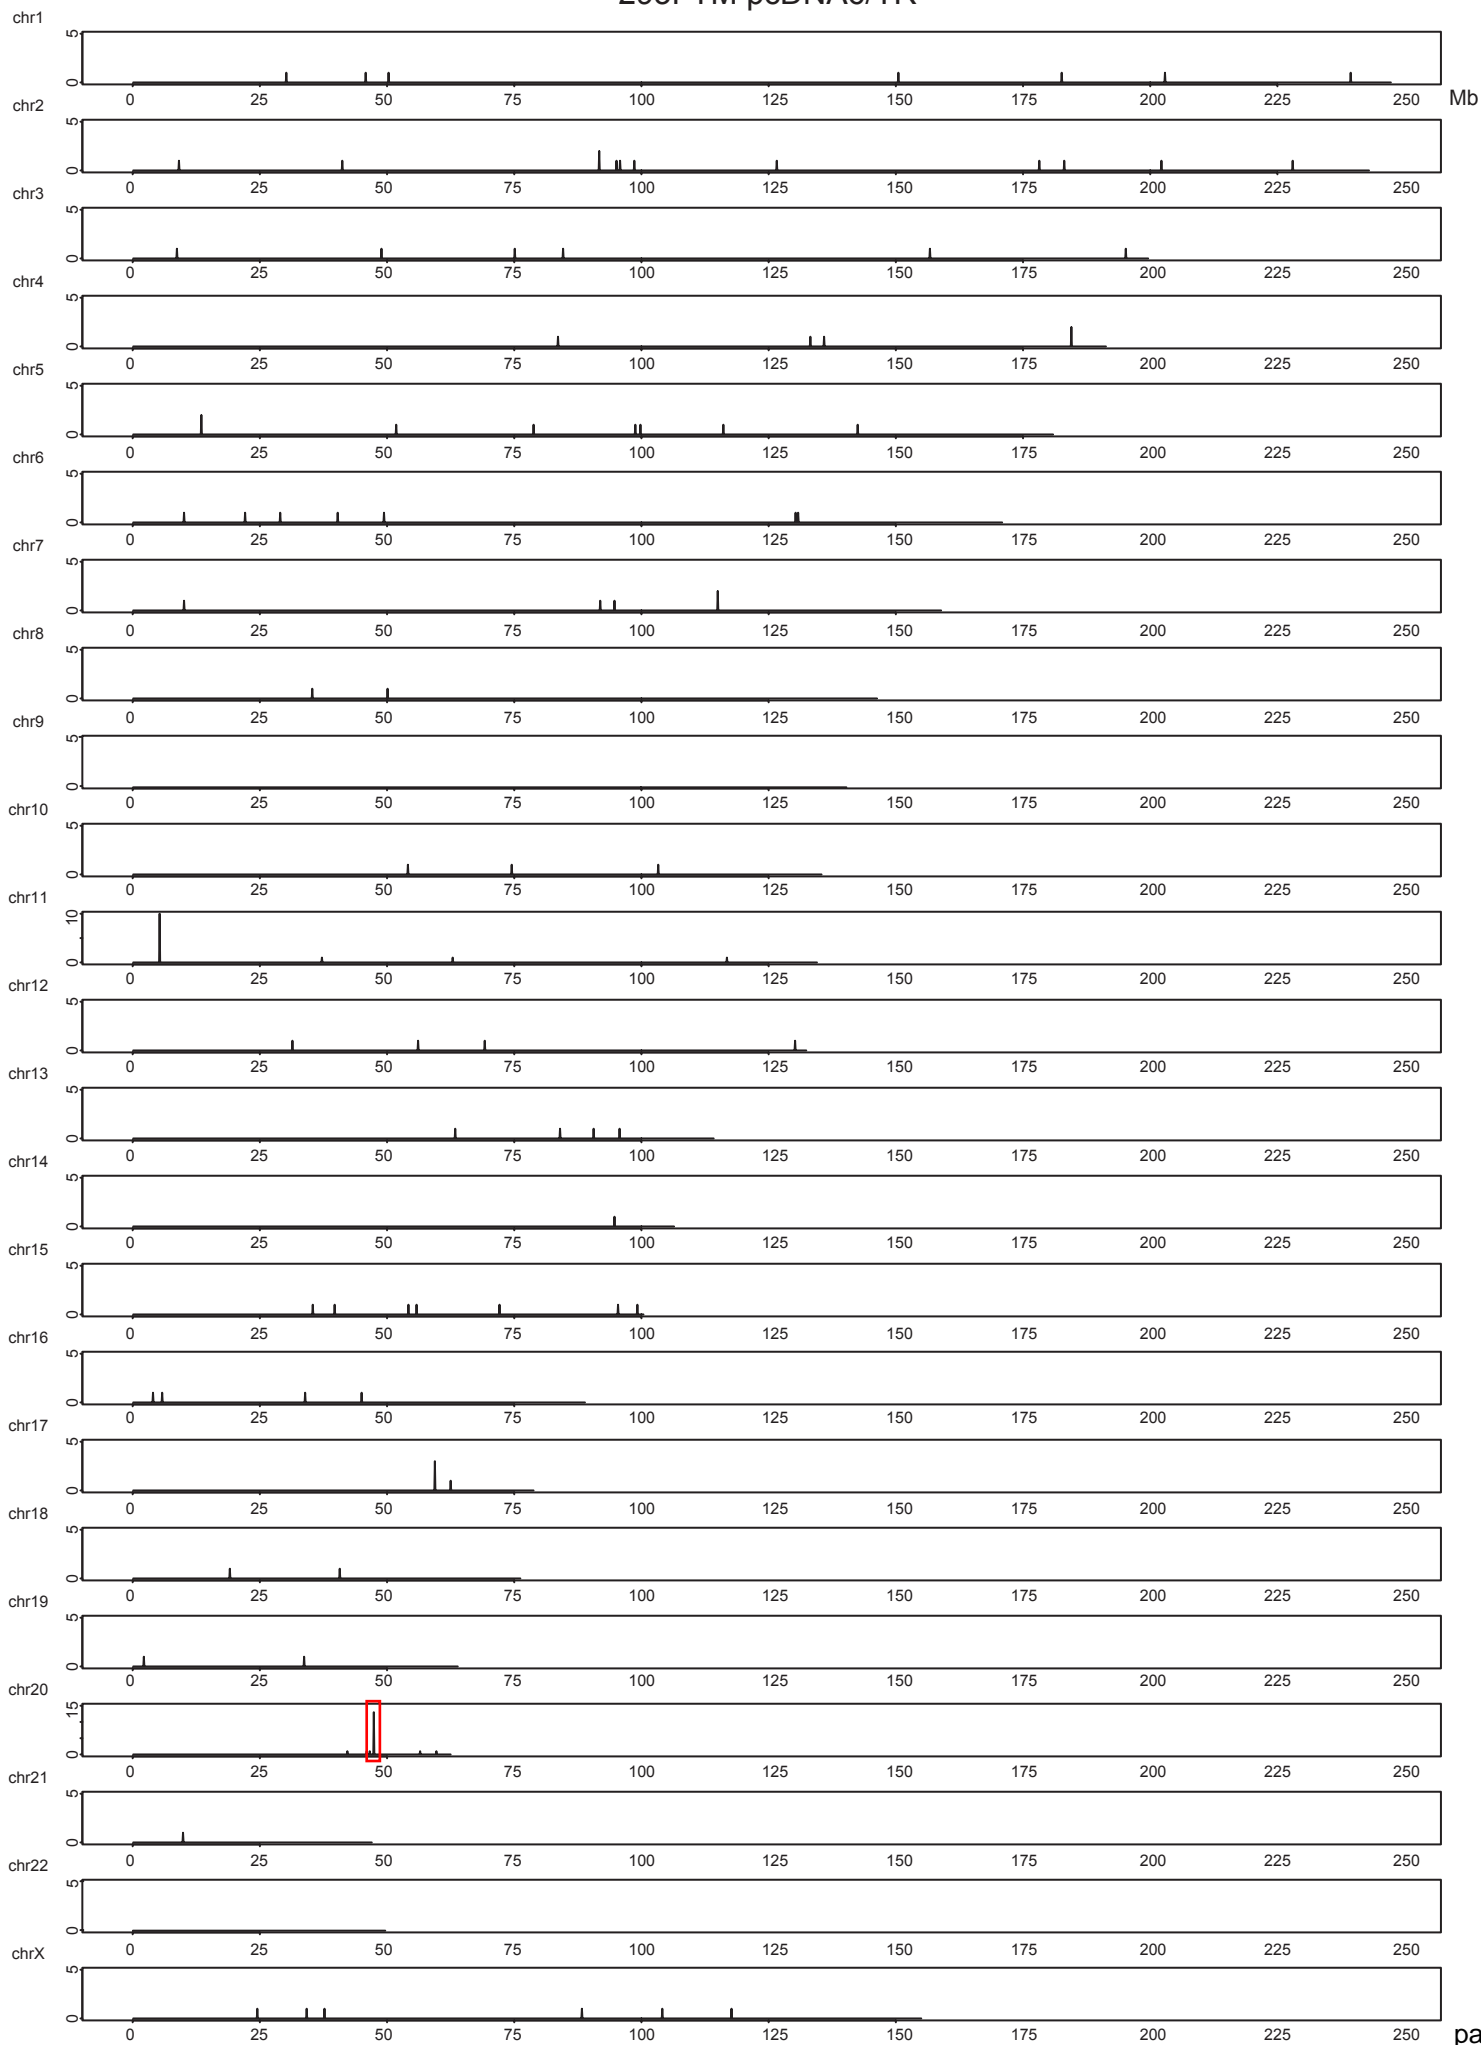

# 293FTM pcDNA6/TR

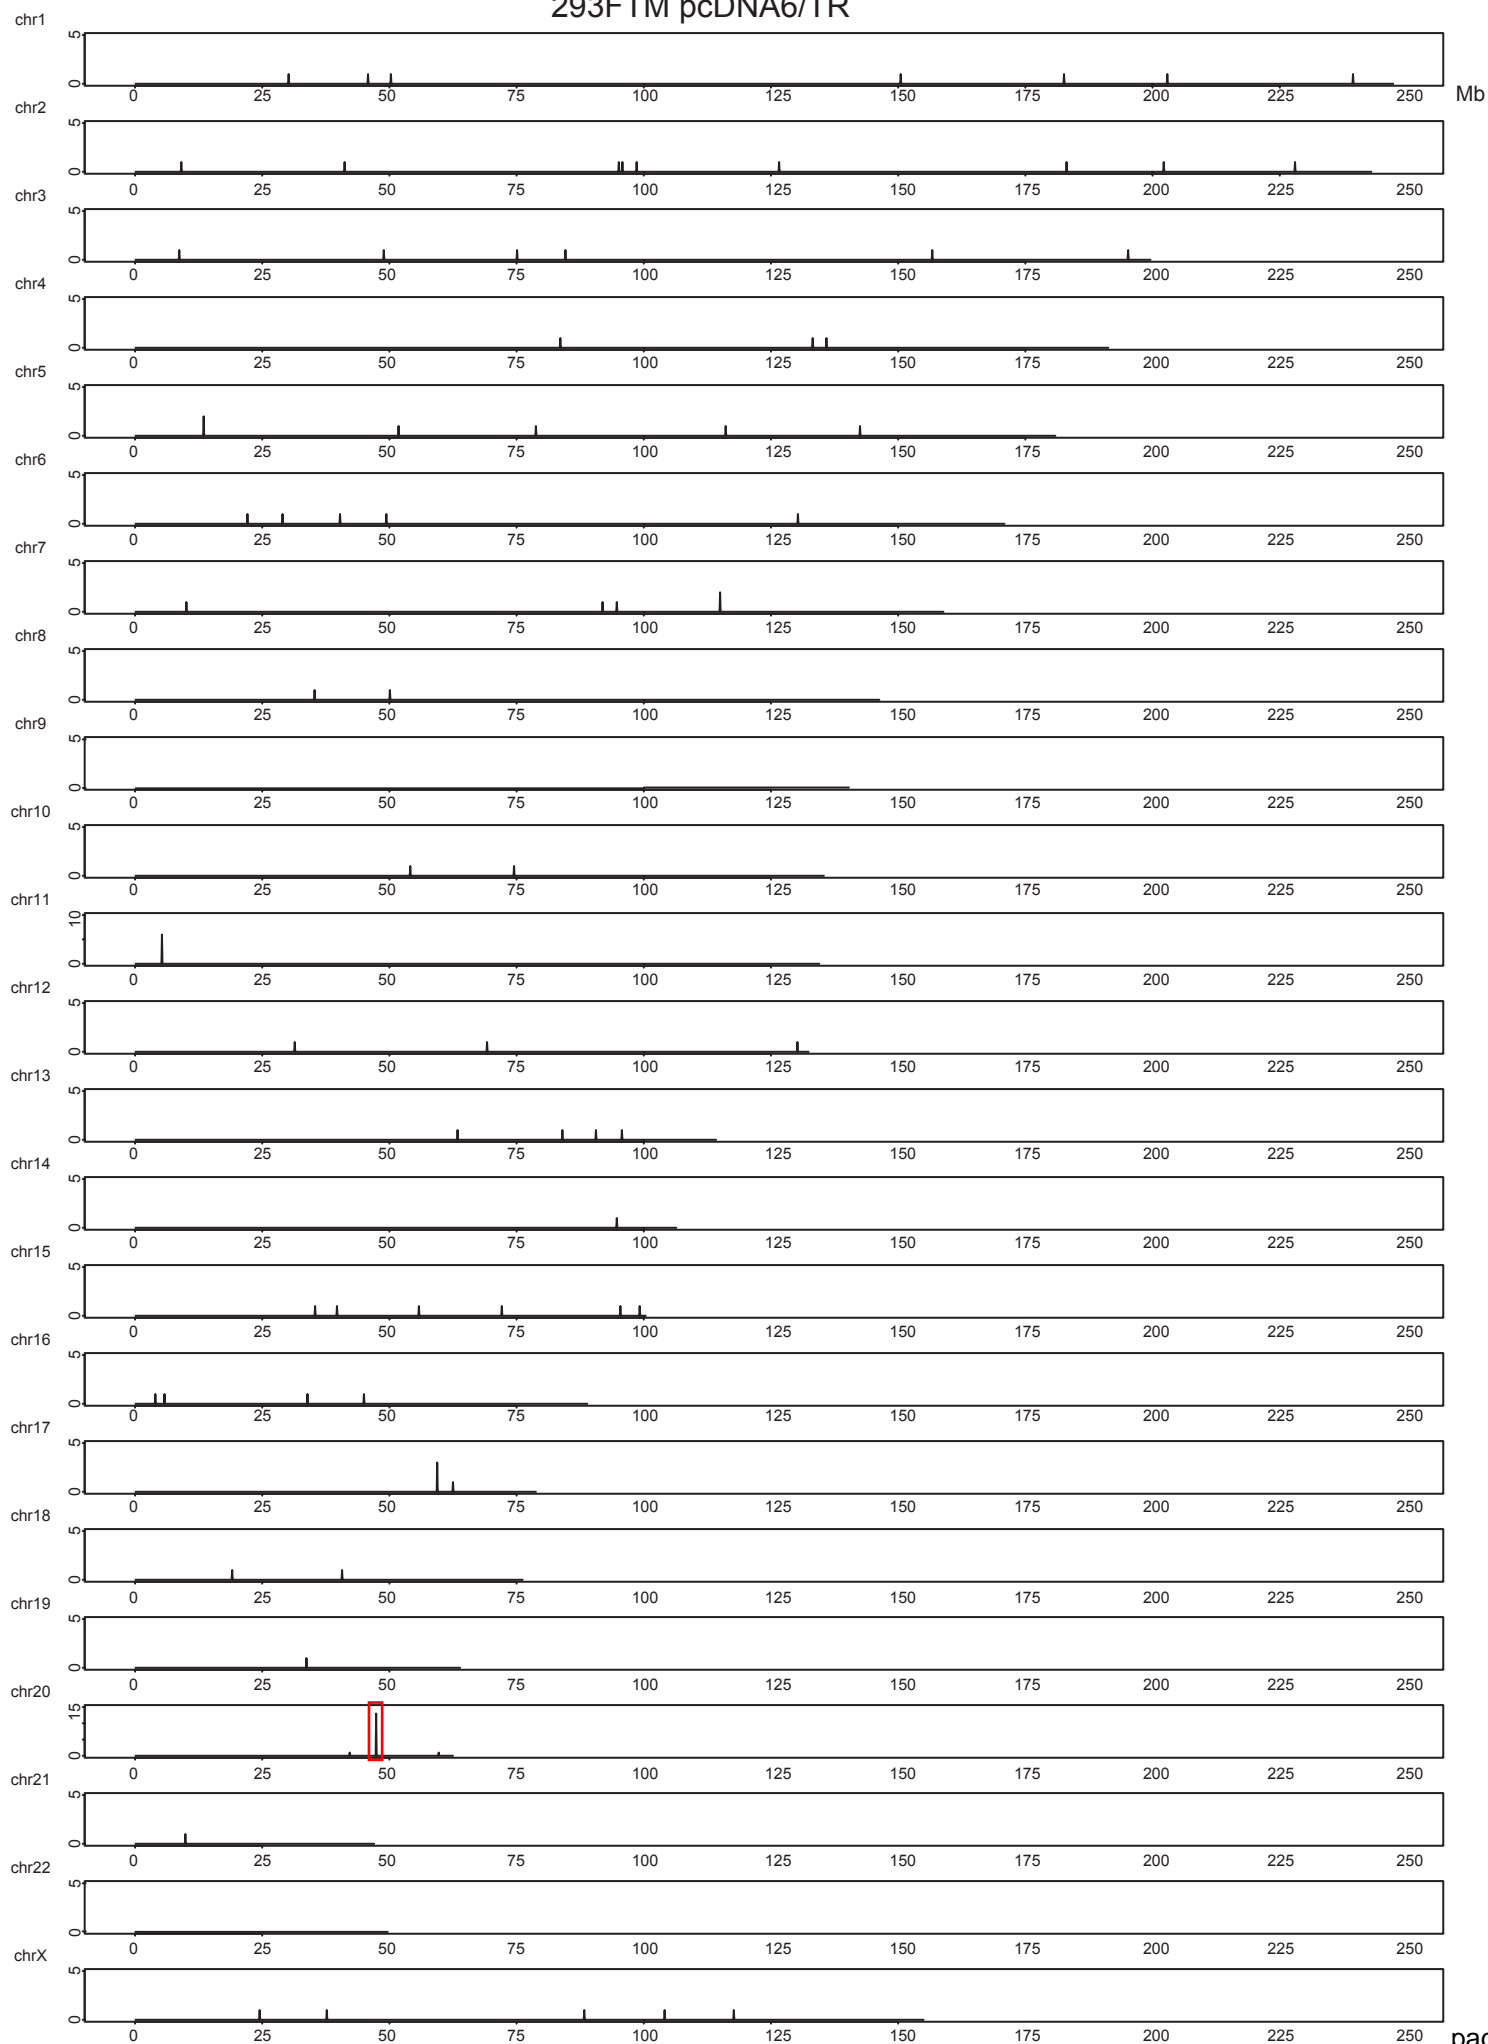



# 293FTM pXP2d2-rPAP1-luci

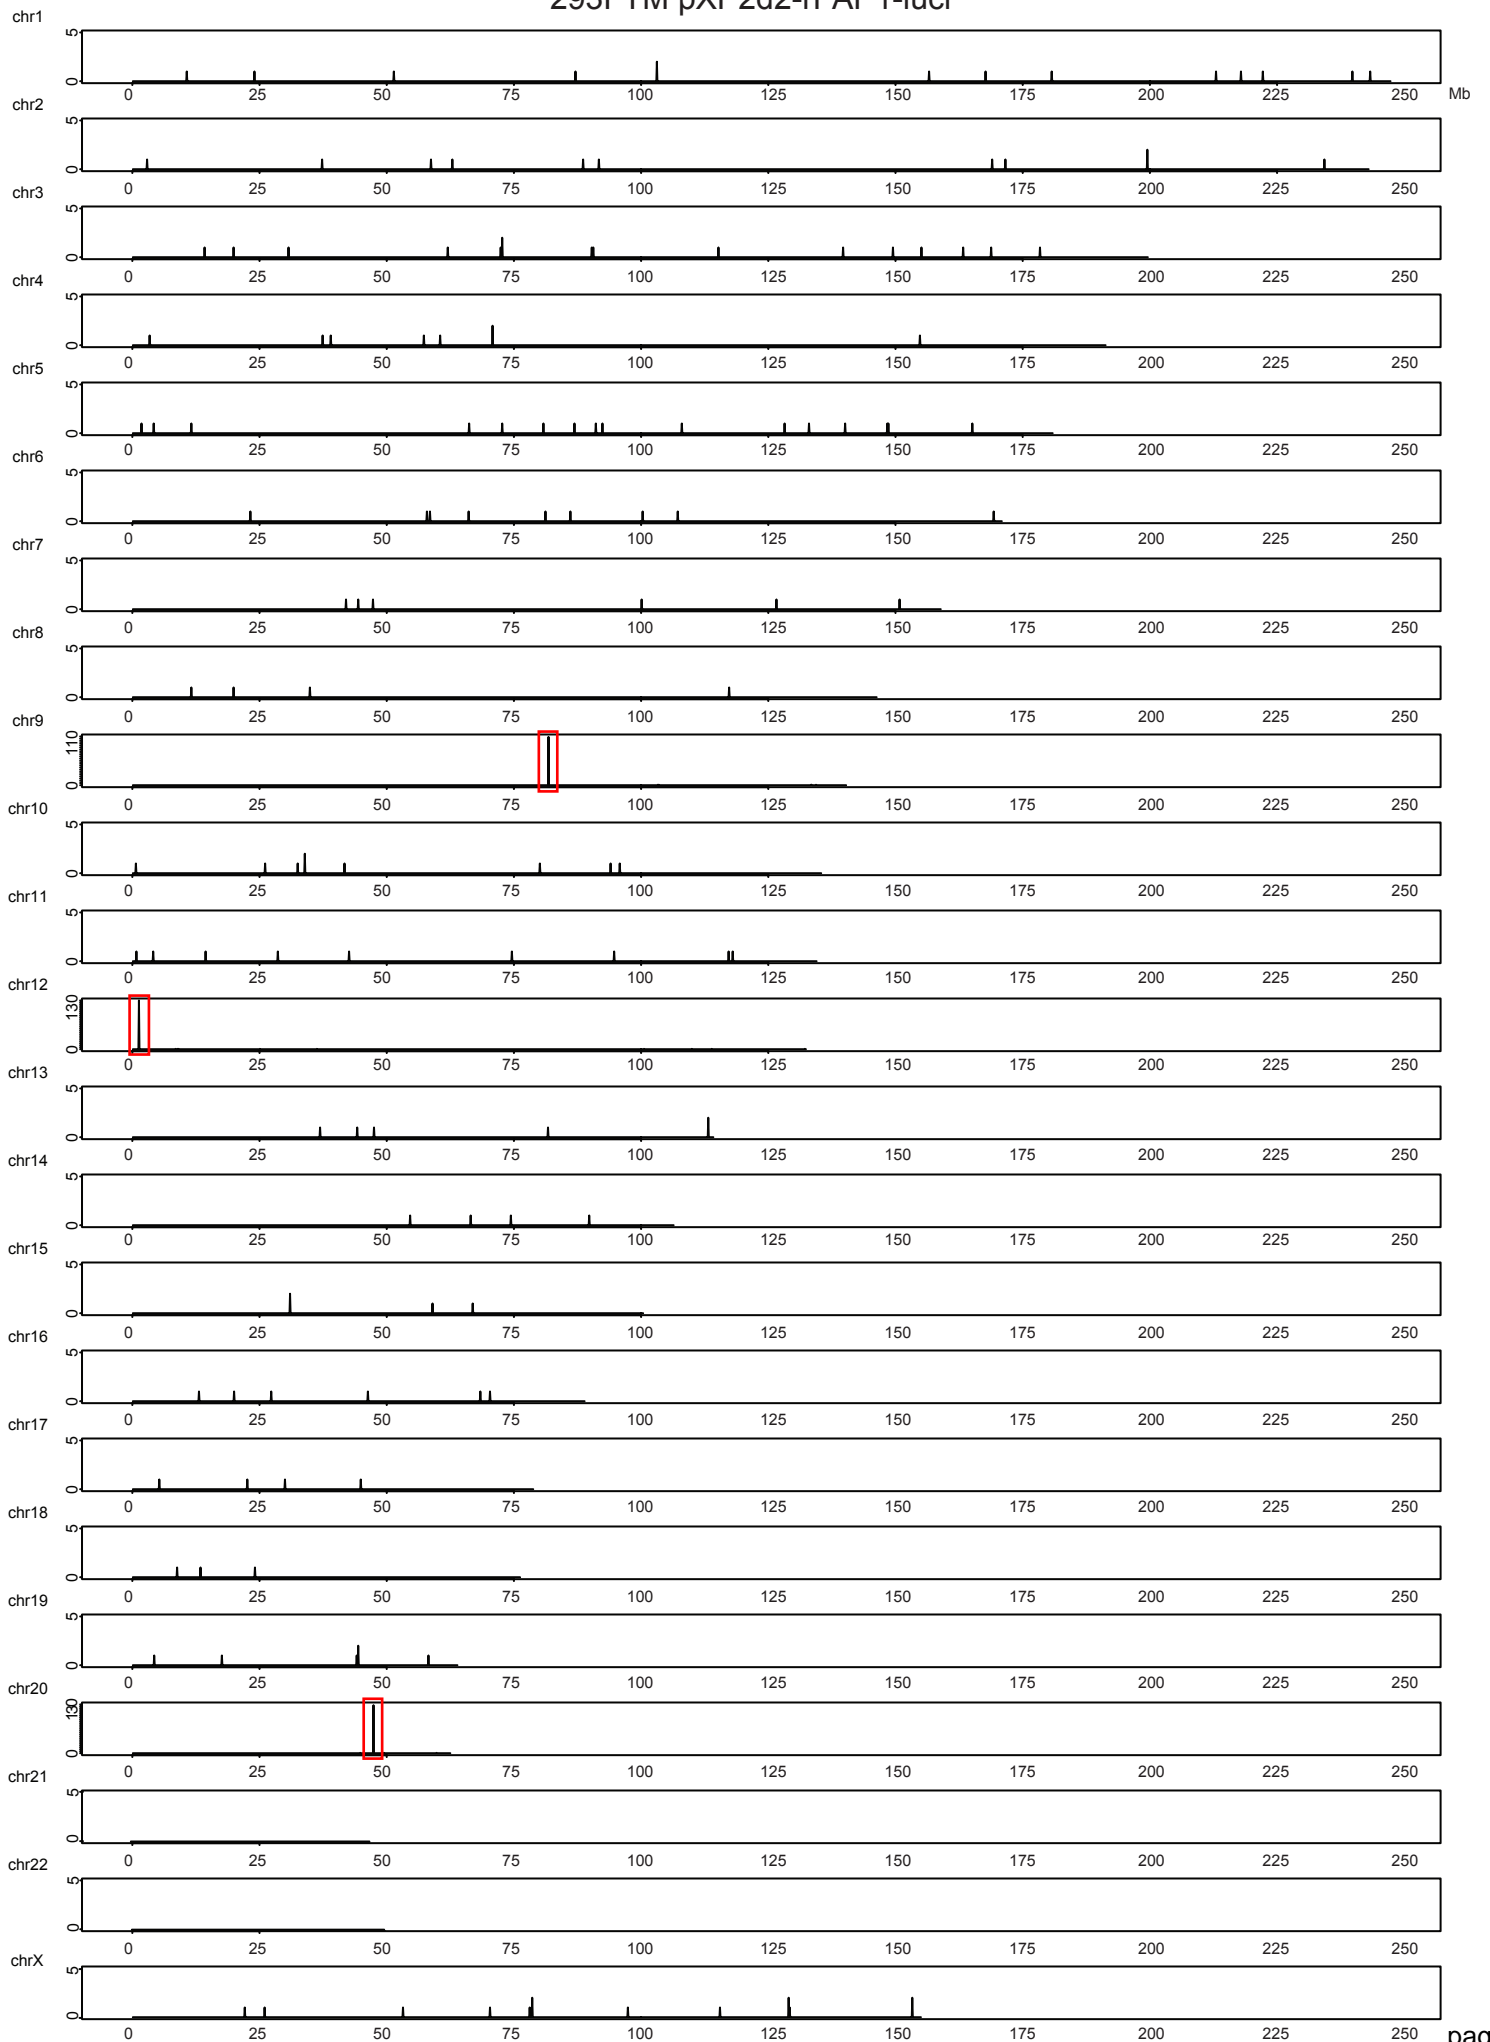

293FTM pXP2d2-rPAP1-luci

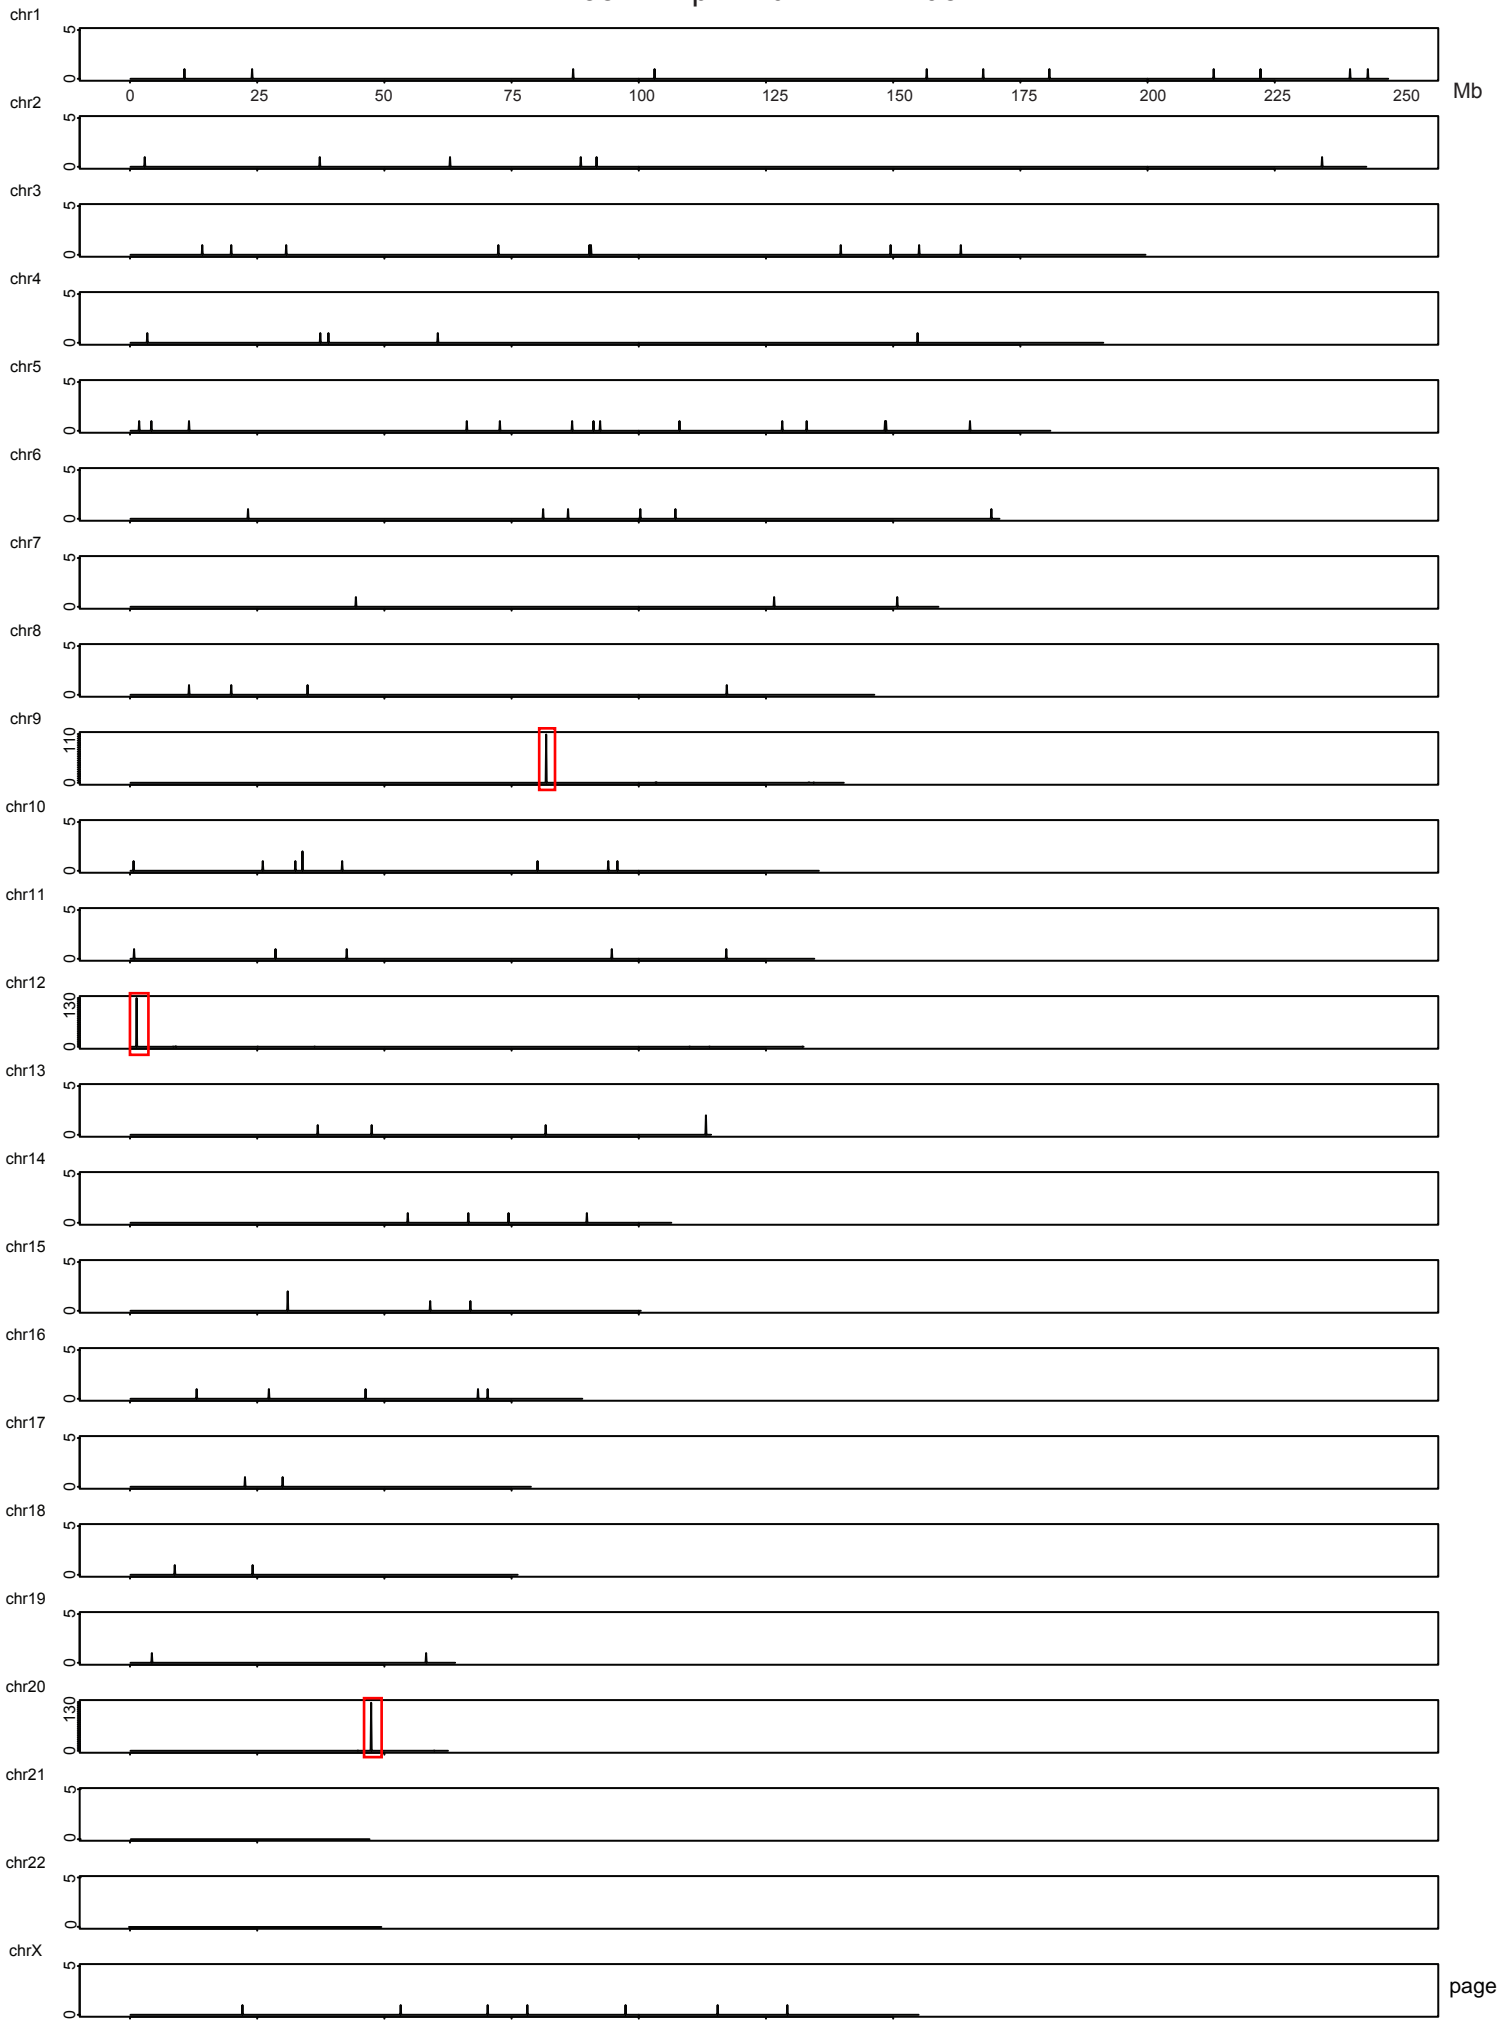

# 293FTM pM5neo-mEcoR

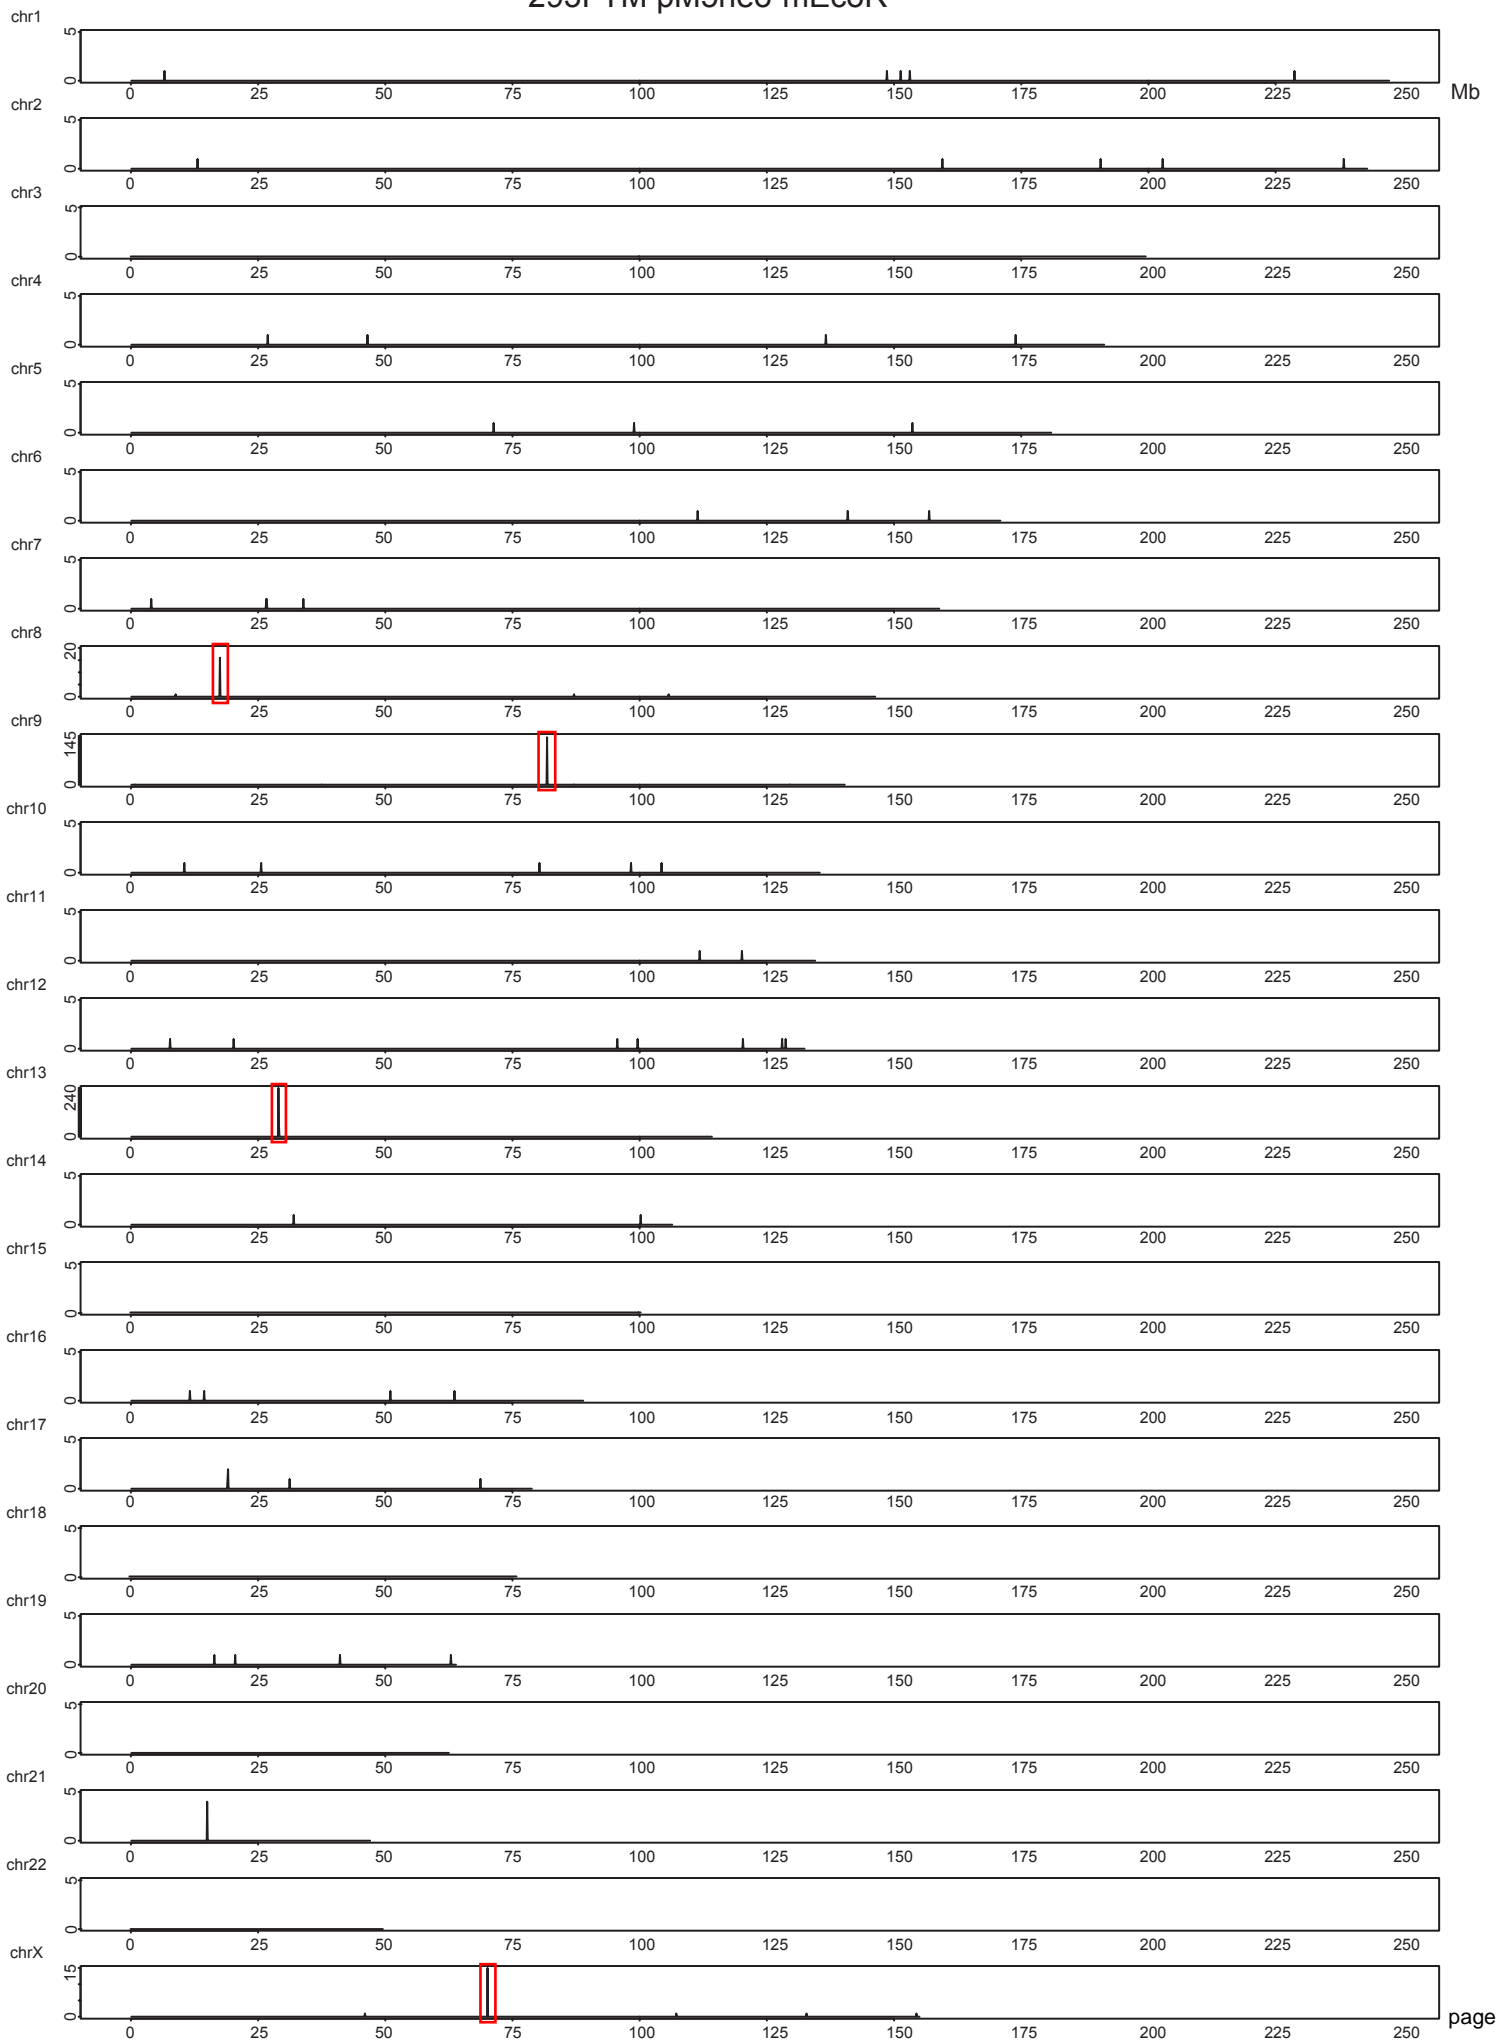

# 293FTM pM5neo-mEcoR

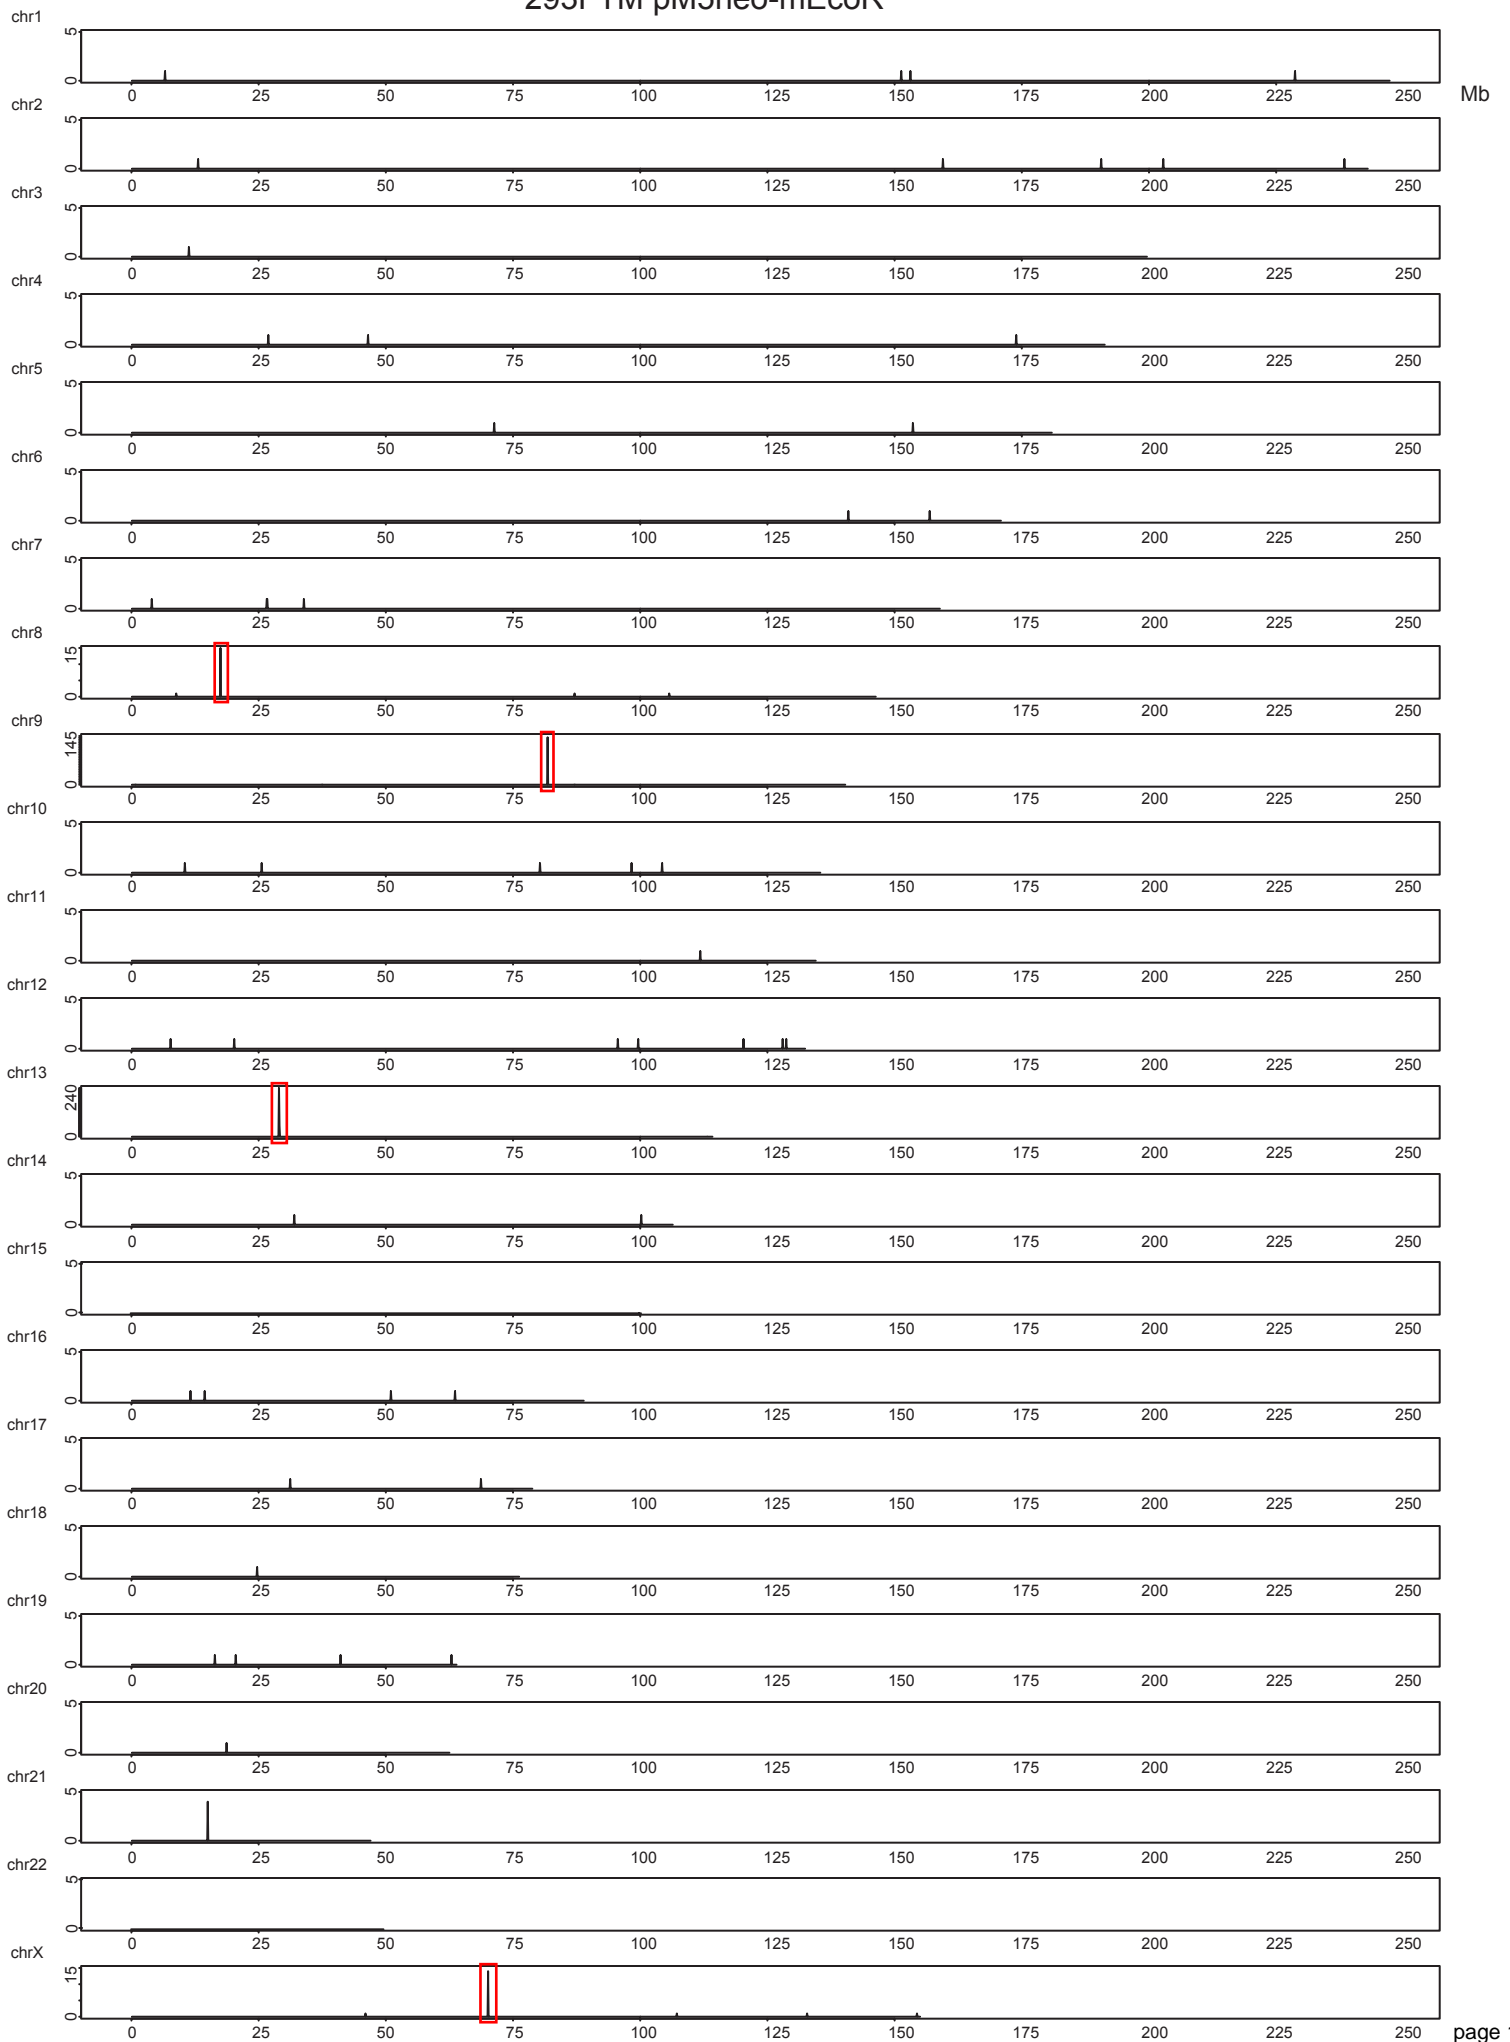

# 293SG pcDNA6/TR

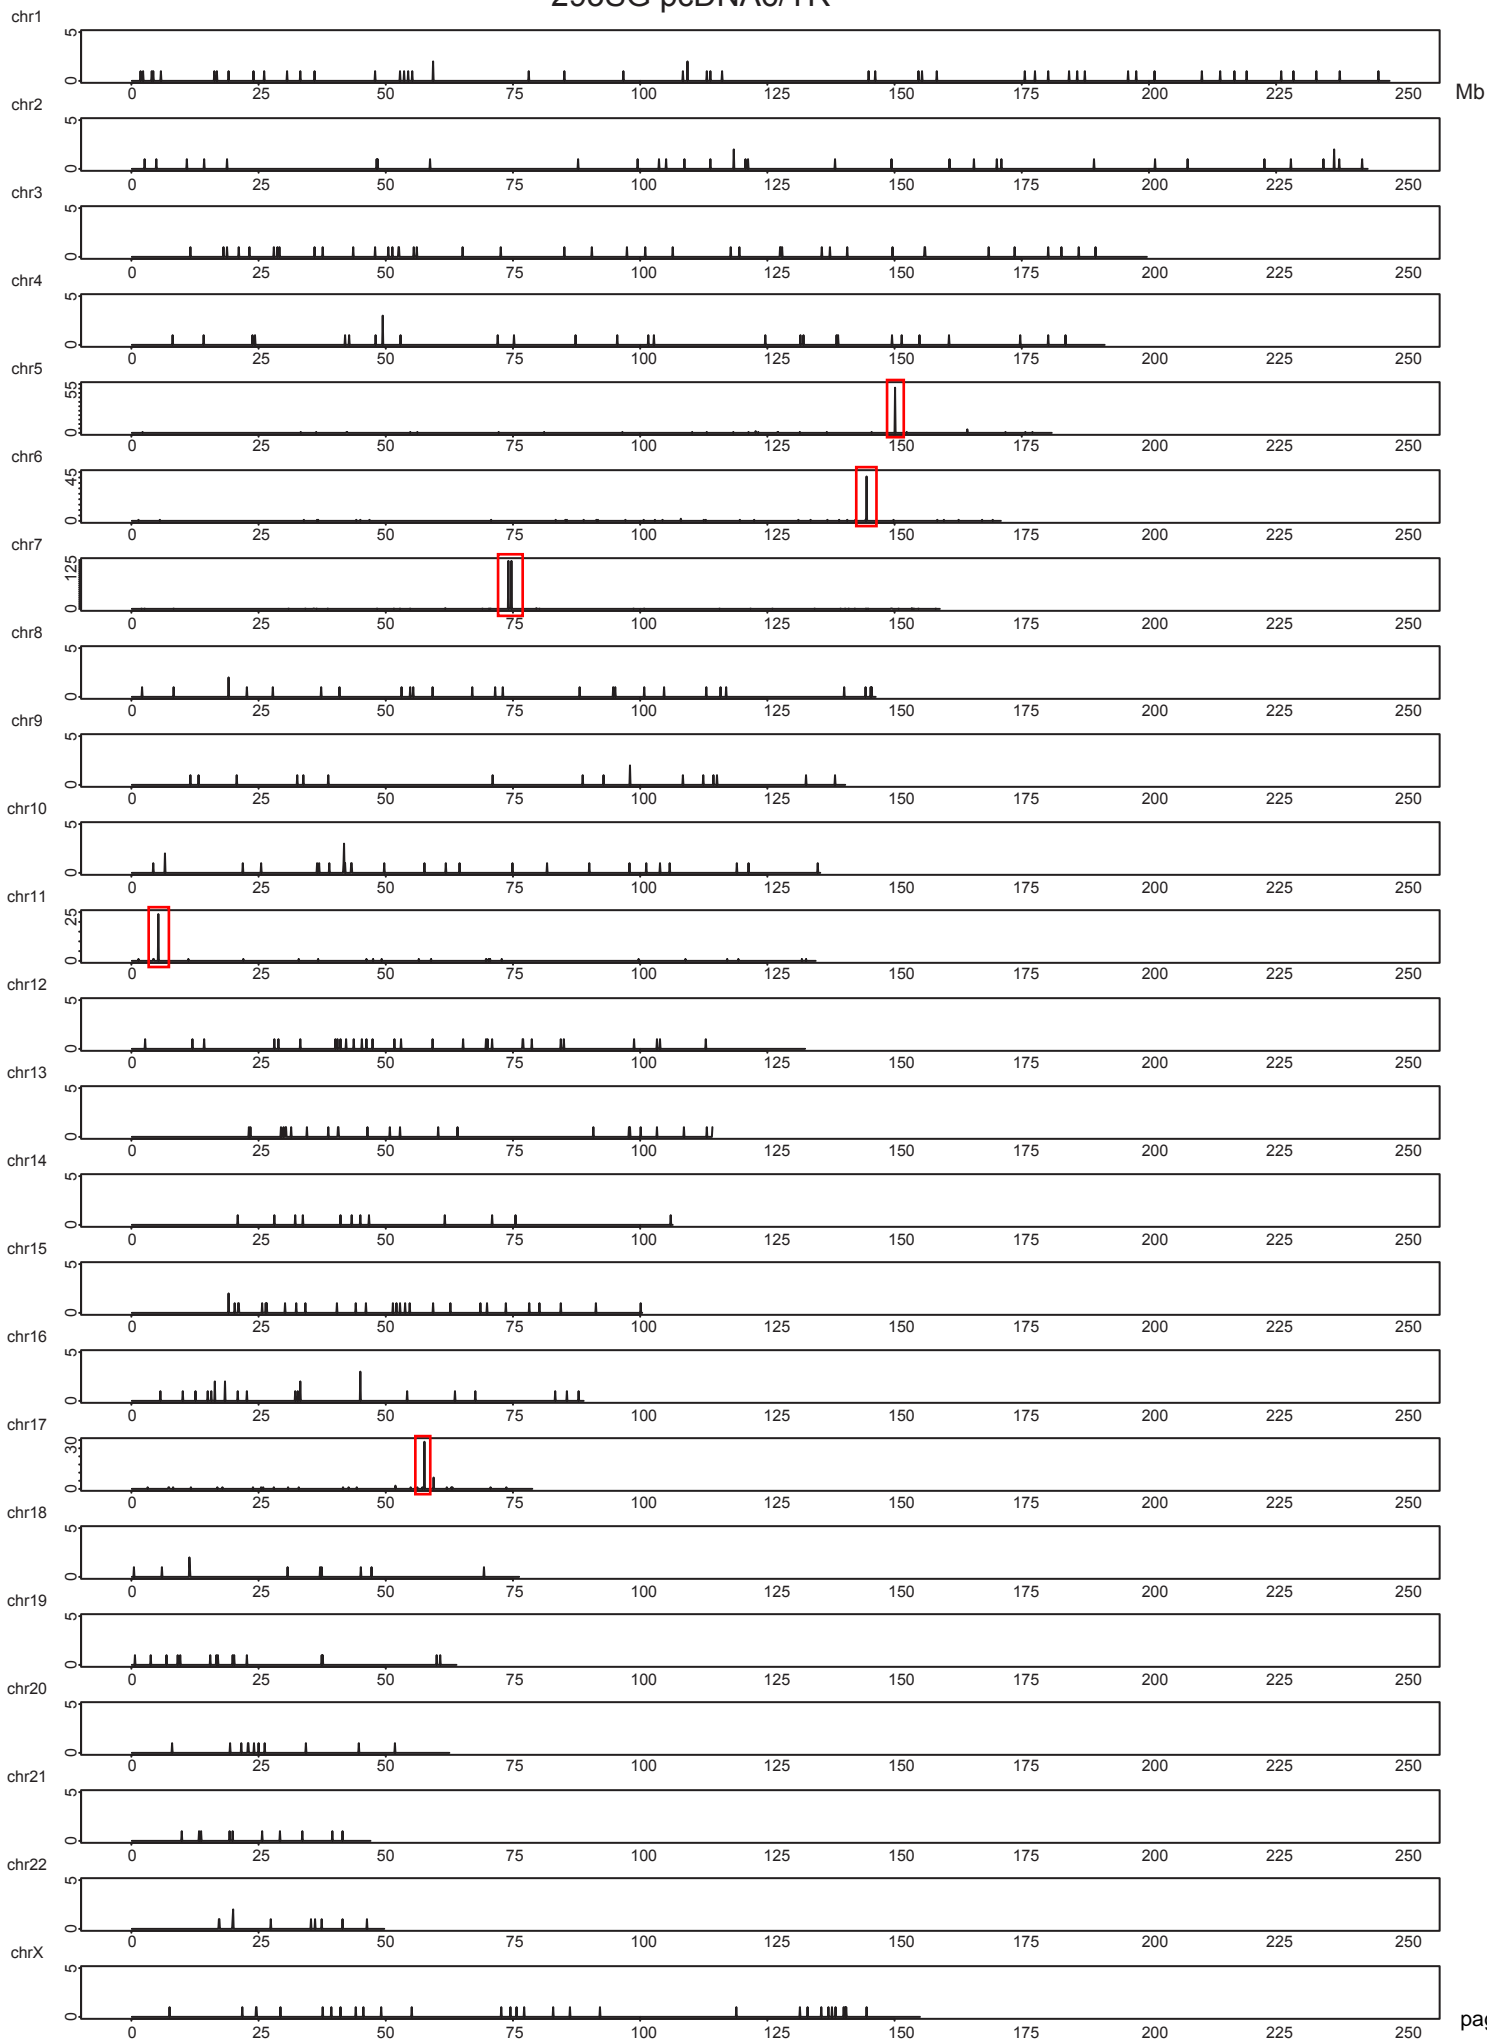

Mb

293SG pcDNA6/TR (filtering on unique hg18 position)

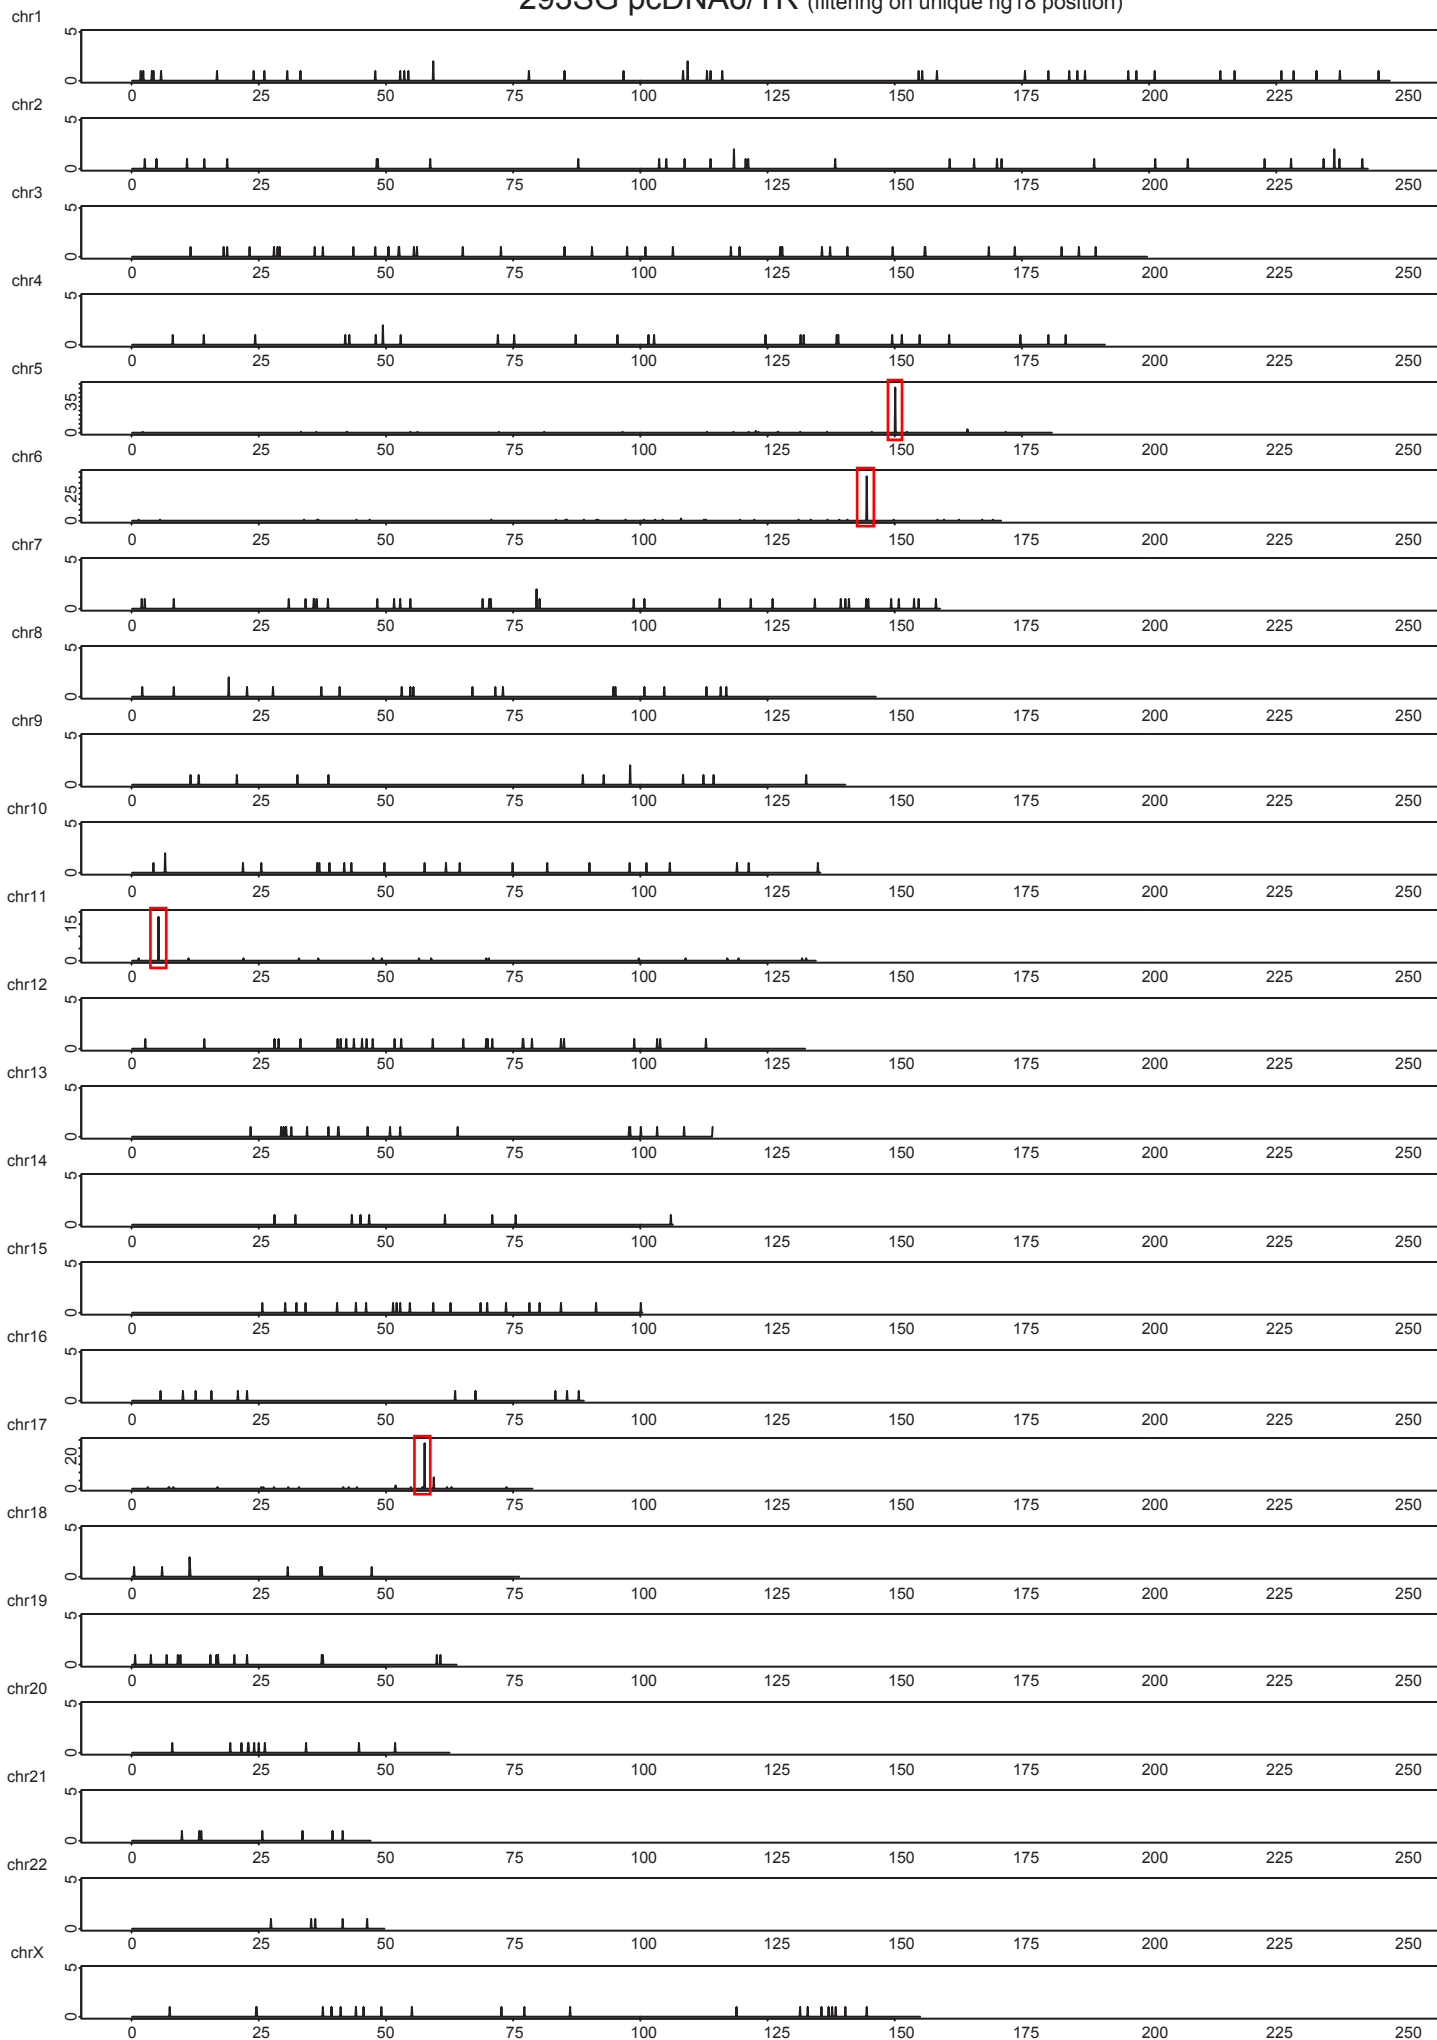

# 293SGGD pcDNA6/TR

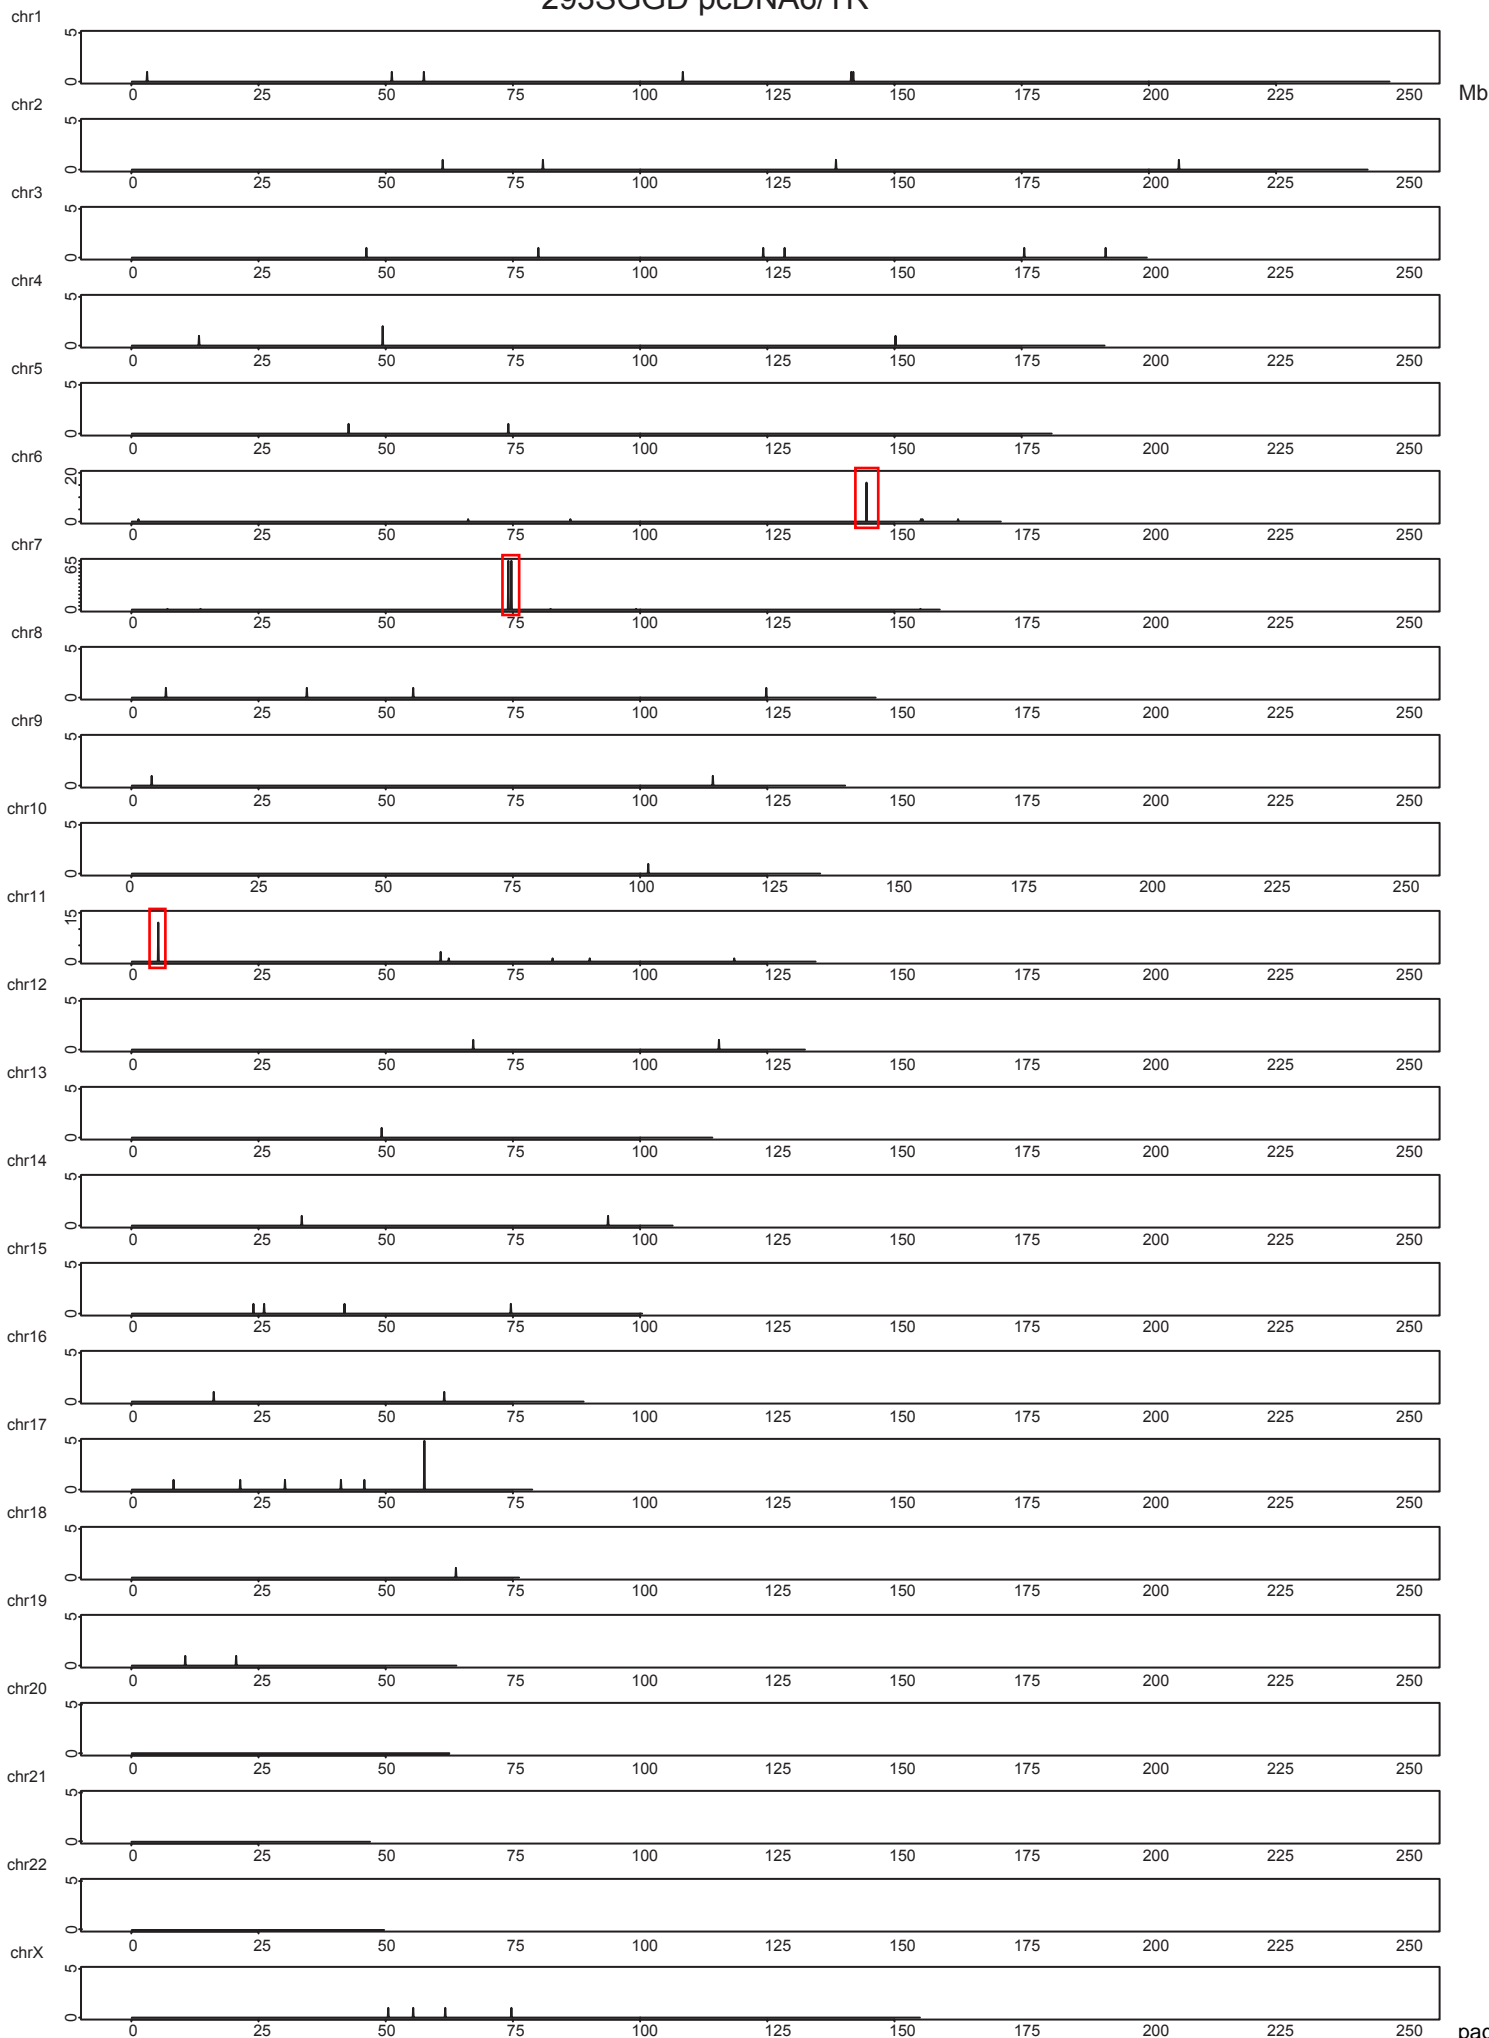

Mb

# 293SGGD pcDNA3.1-zeo-STendoT

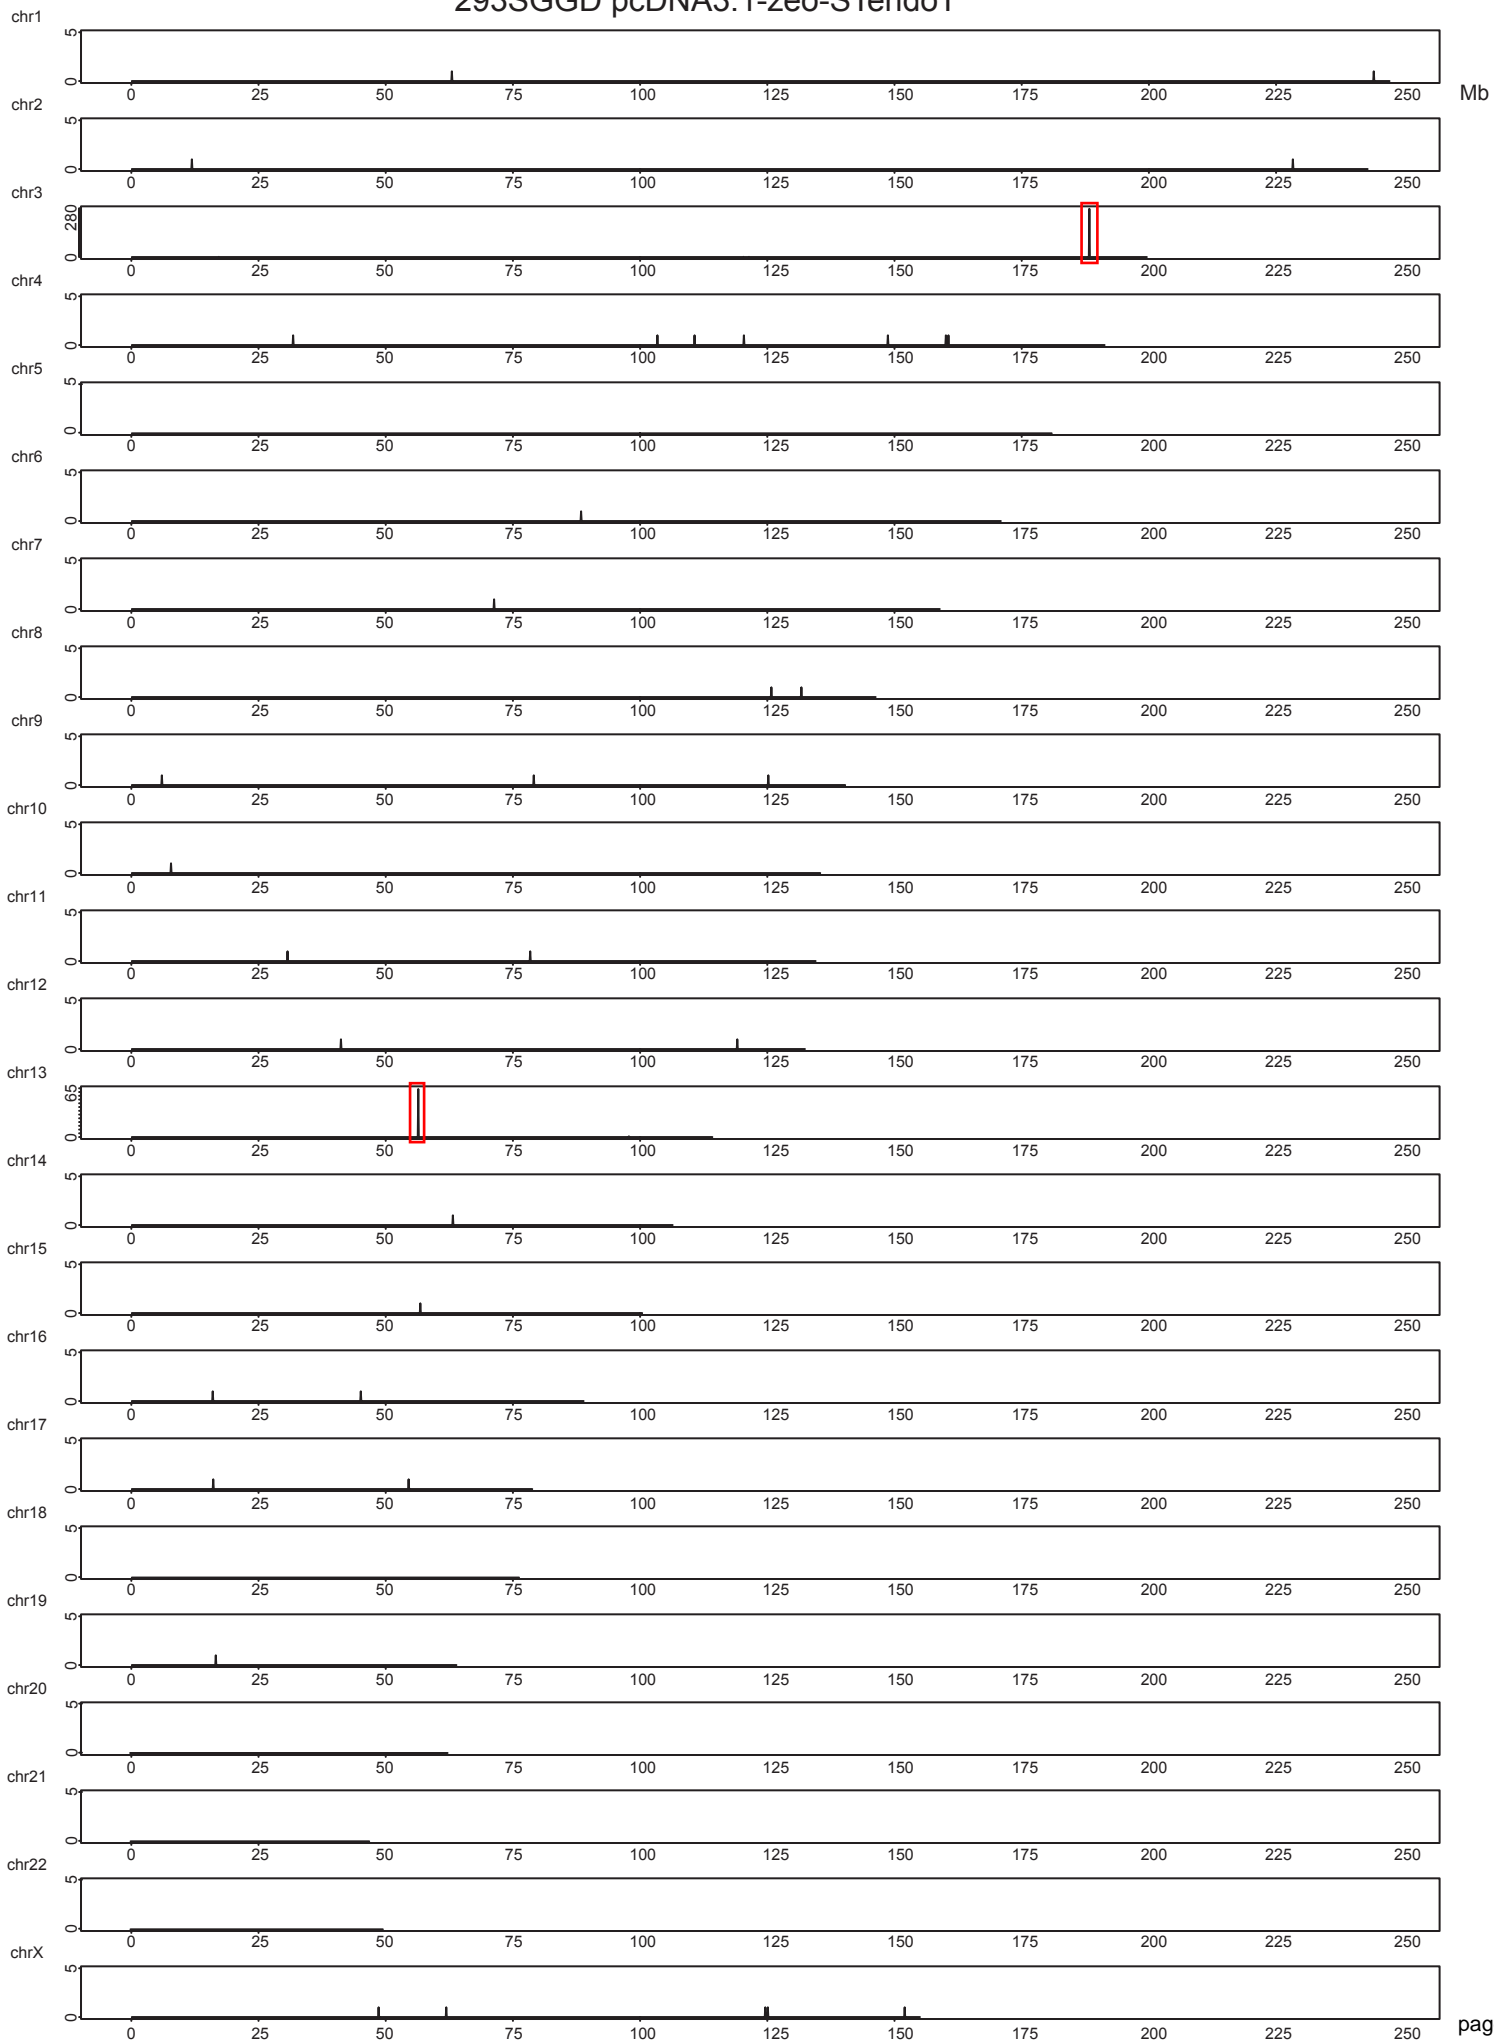



# 293SGGD pcDNA3.1-zeo-STendoT

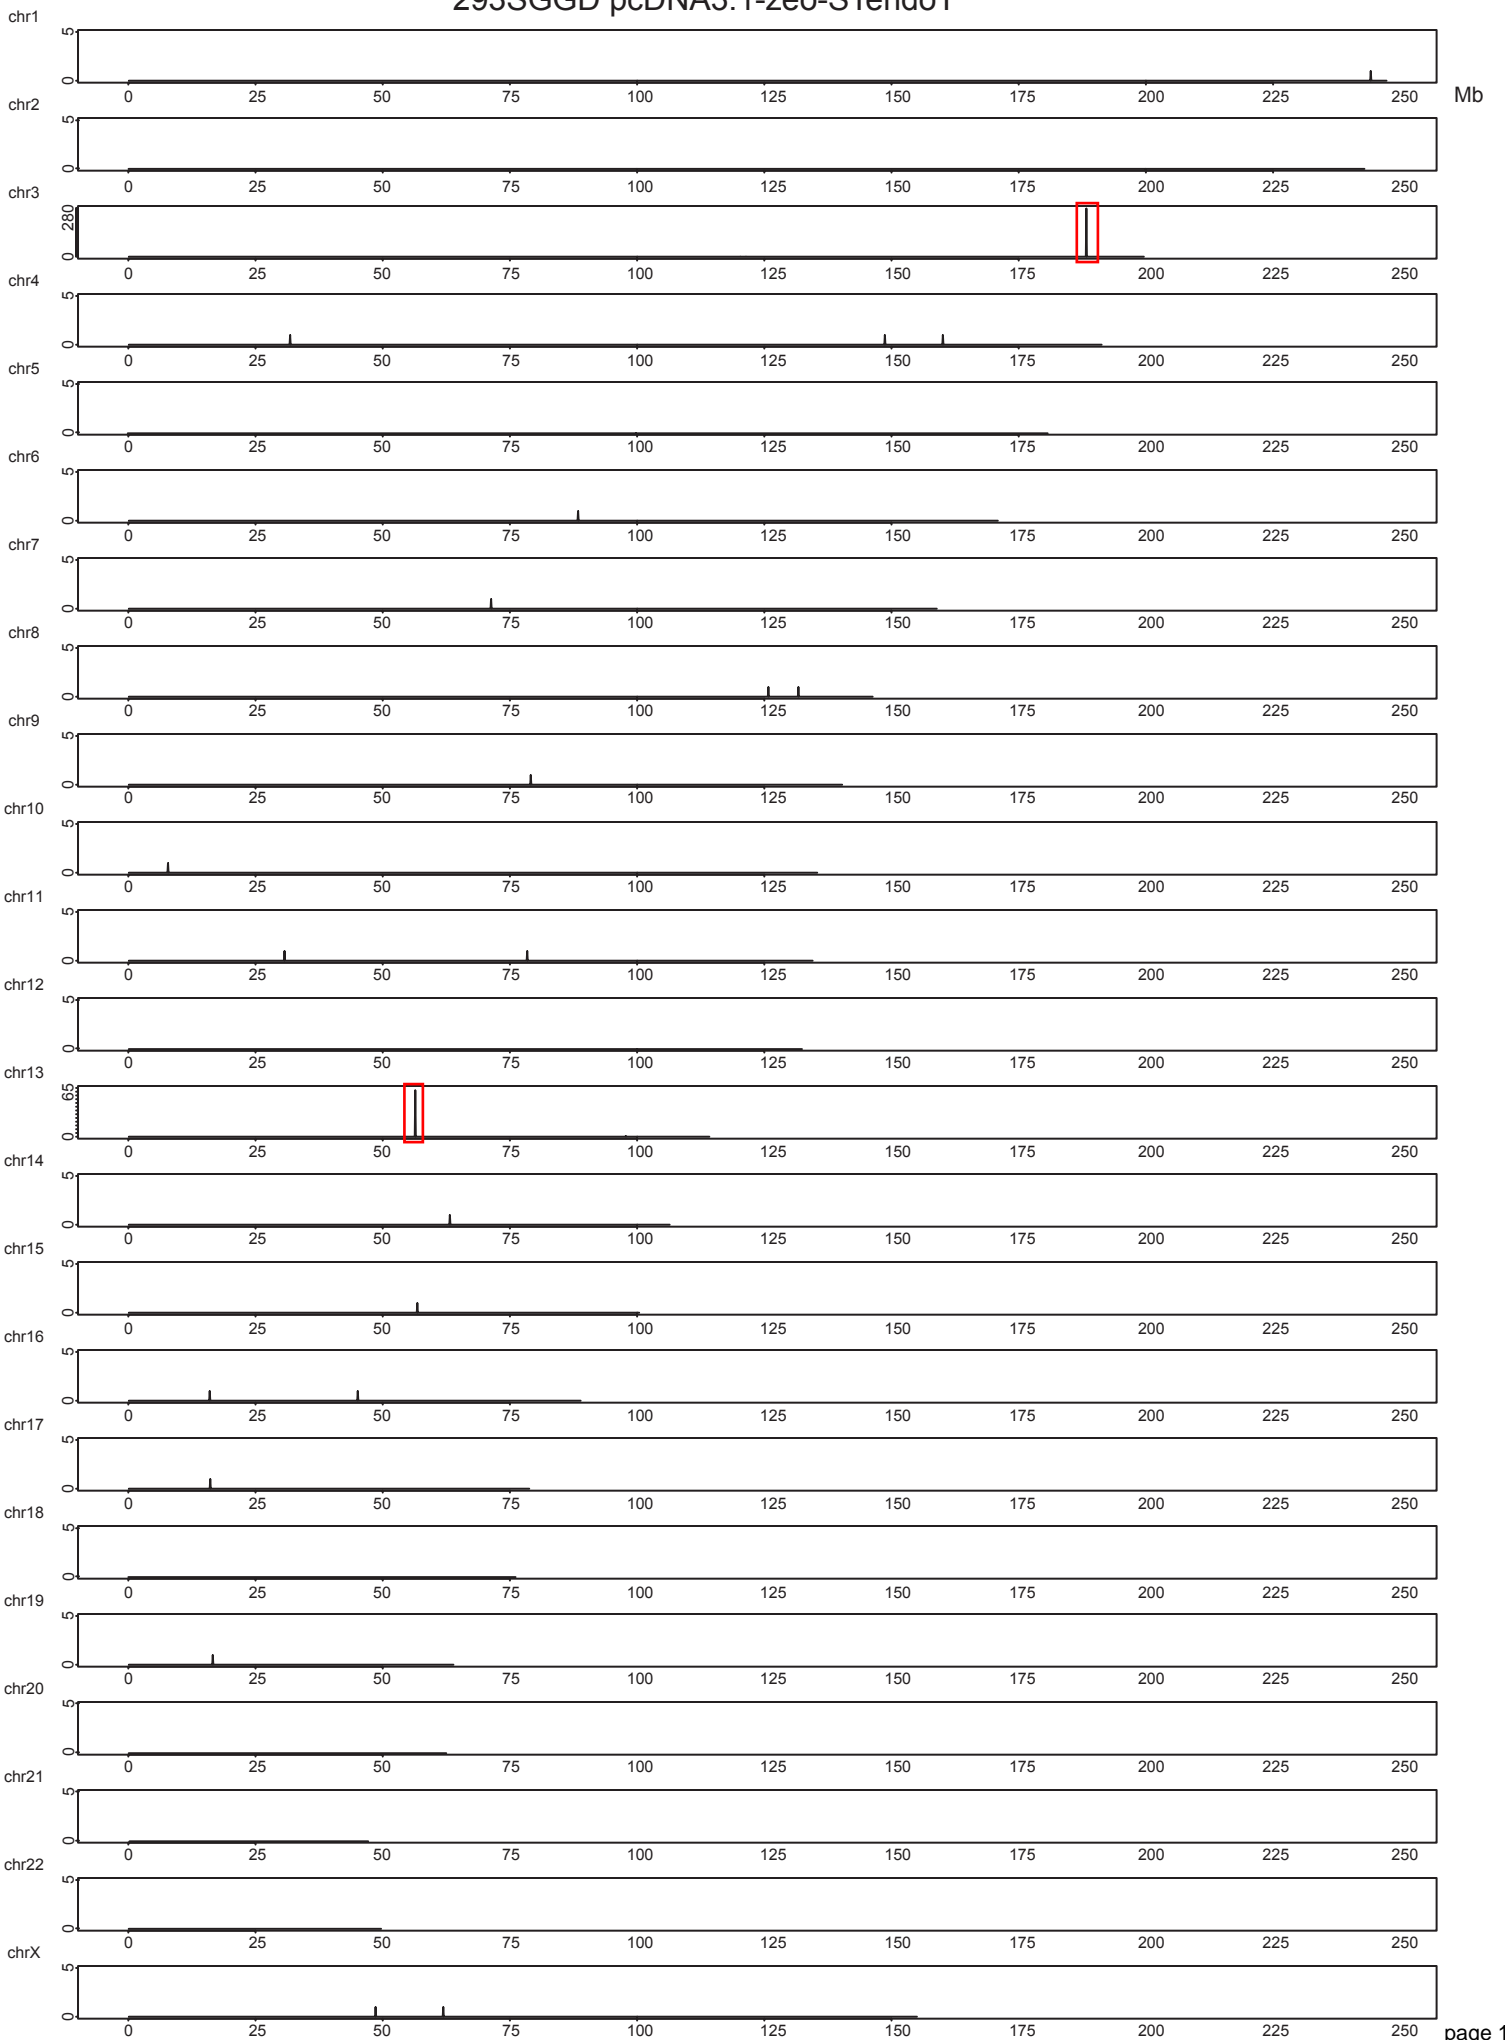

Supplement: ncomms5767-s8.pdf [file ncomms5767-s8.pdf]
