# Supplementary material for: Genome dynamics of the human embryonic kidney 293 lineage in response to cell biology manipulations
Source: PubMed Central journal article supplement — Nat Commun. 2014 Sep 3;5:4767. doi: 10.1038/ncomms5767 (PMC4166678; doi:10.1038/ncomms5767), 2014-09-03
Supplement: ncomms5767-s7.pdf [file ncomms5767-s7.pdf]

293 - CG CNV

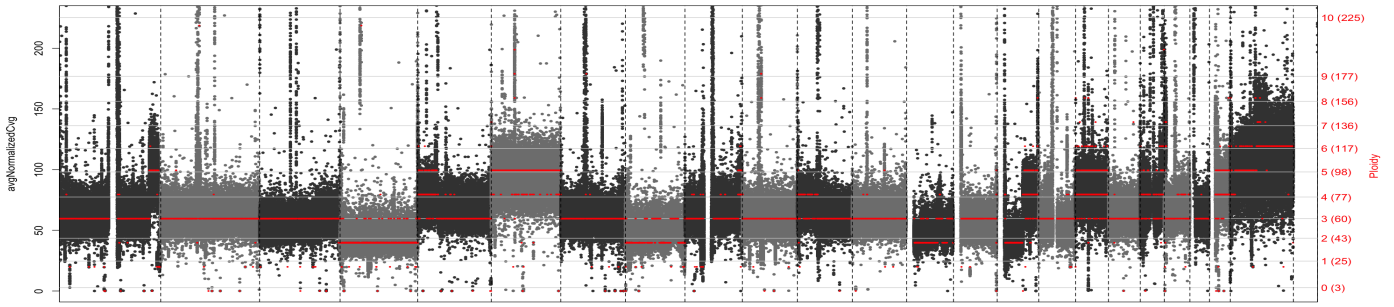

293 - CG BAF

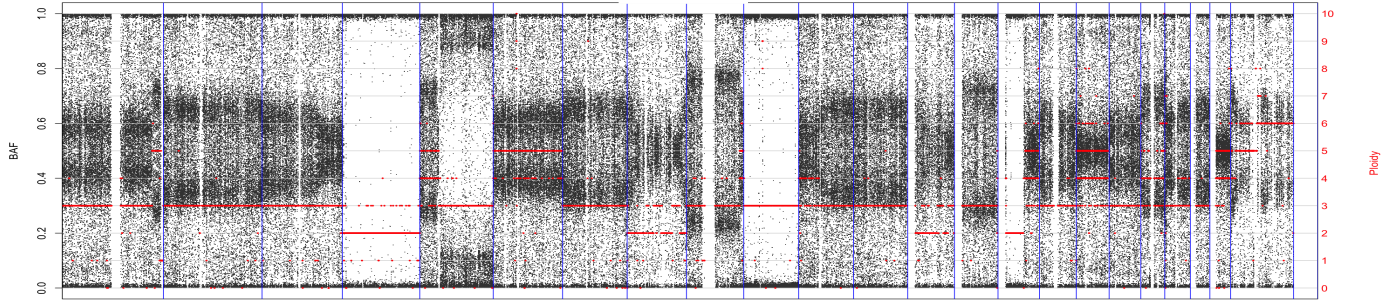

293 - SNParray, ploidy

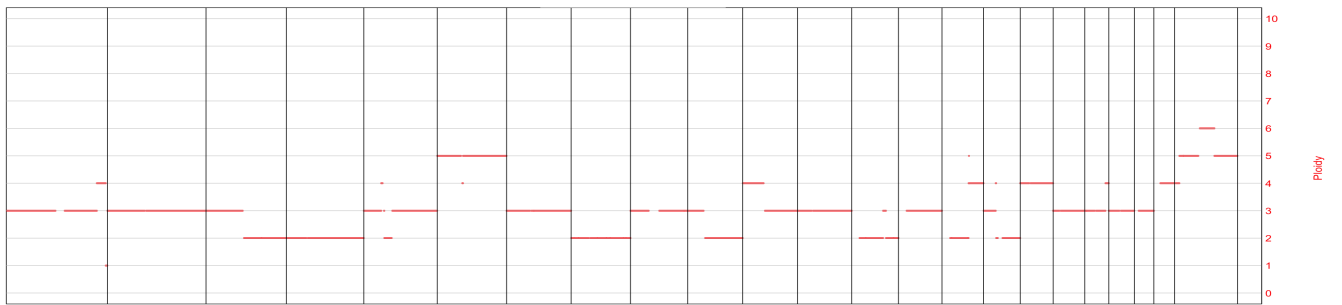

passed 5x,  
frozen,  
recovered

293 - SNParray, ploidy

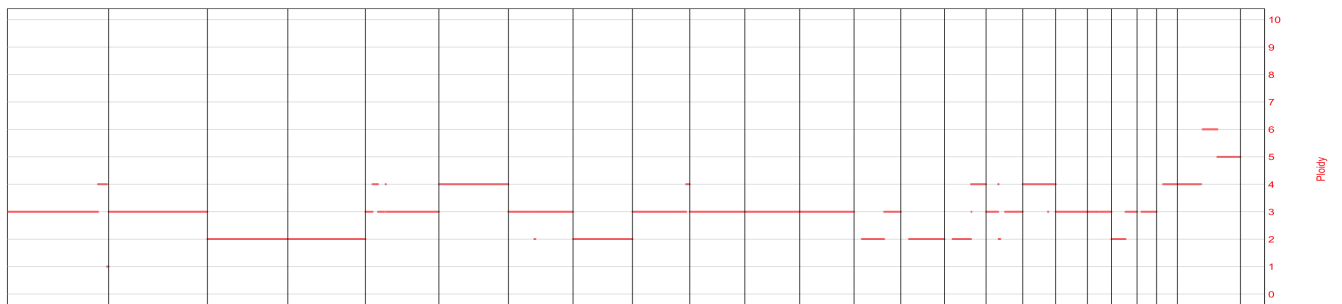

passed 3x

293 - SNParray, ploidy

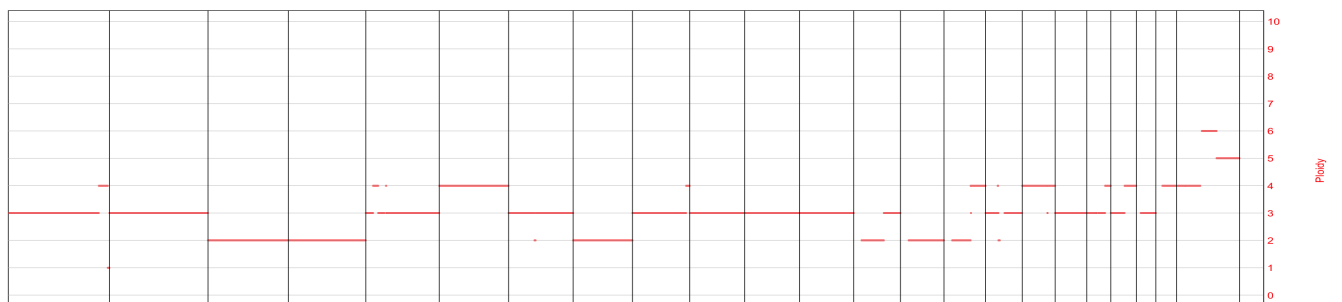

293FTM - CG CNV

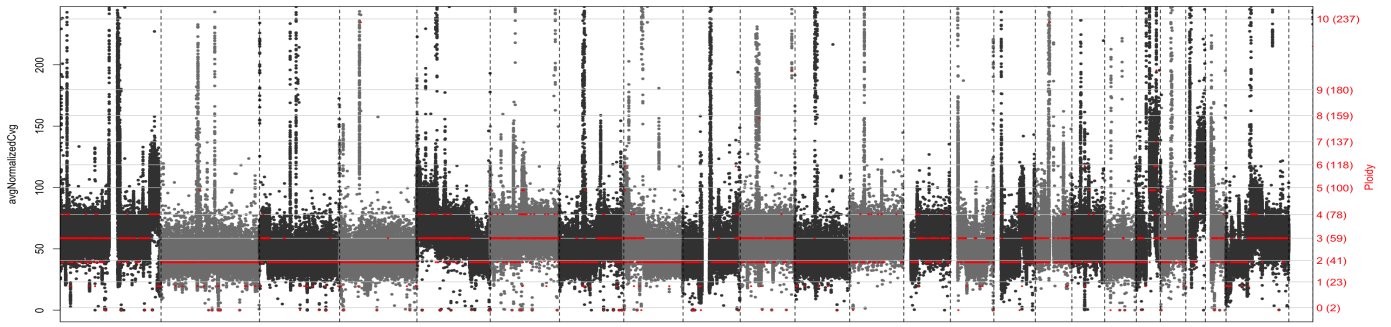

293FTM - CG BAF

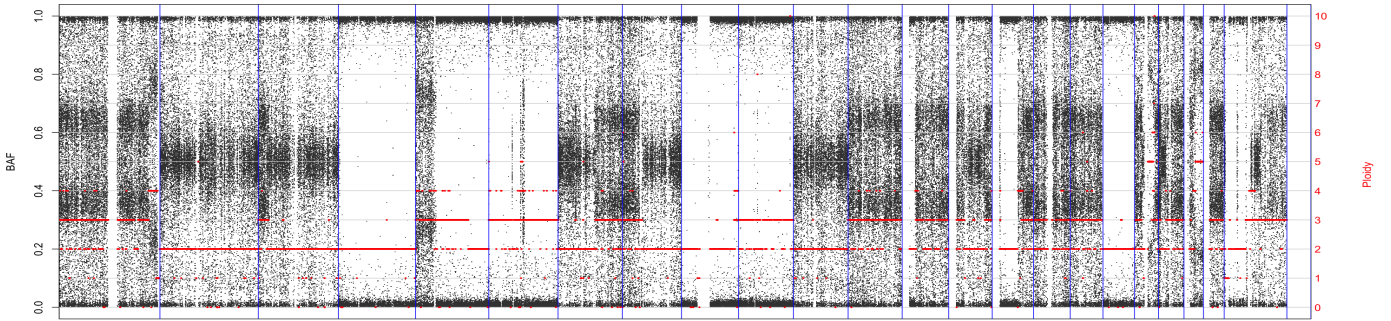

293FTM - SNParray, ploidy

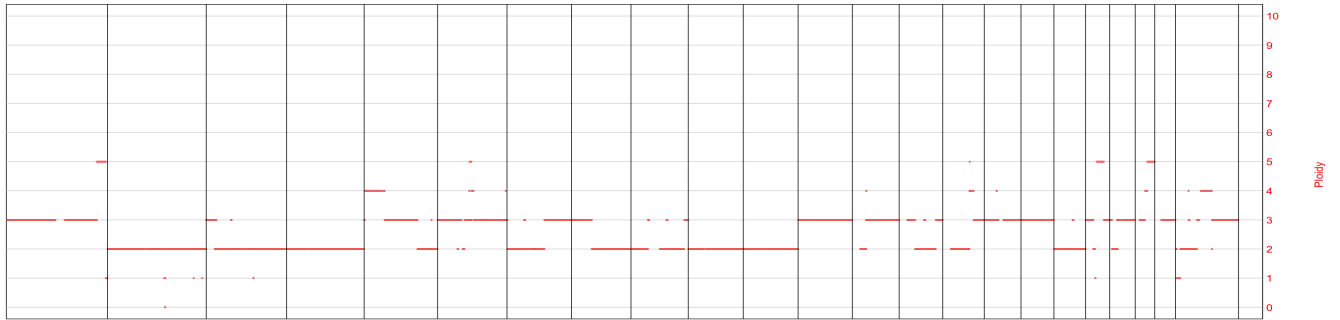

passaged 4x,  
frozen,  
recovered

293FTM - SNParray, ploidy

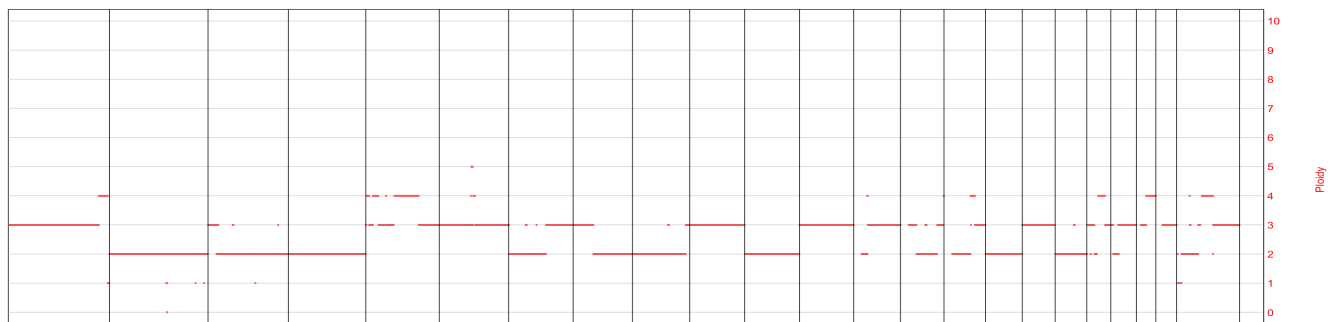

passaged 3x

293FTM - SNParray, ploidy

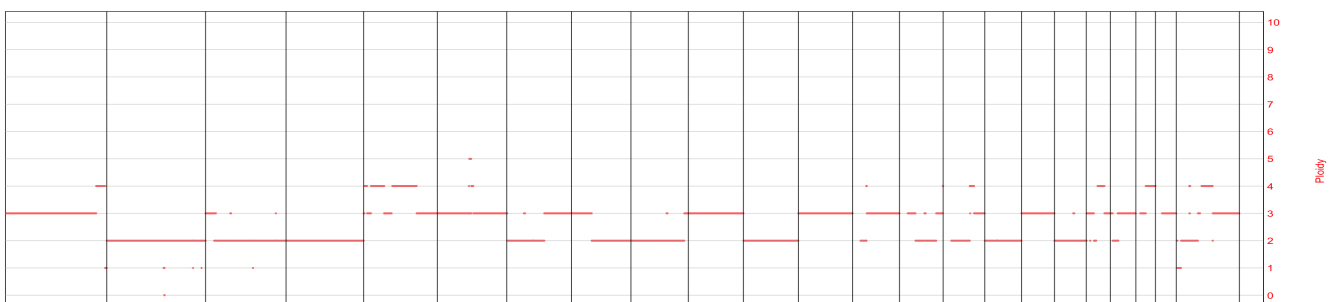

293S - CG CNV

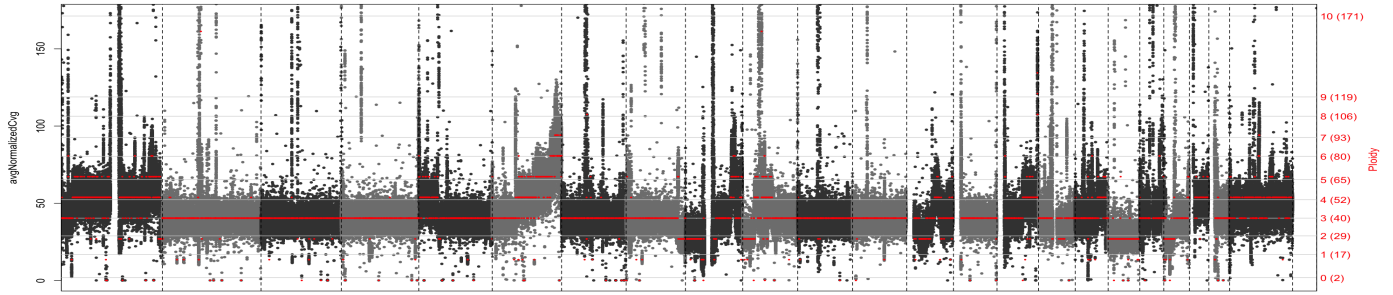

293S - CG MAF

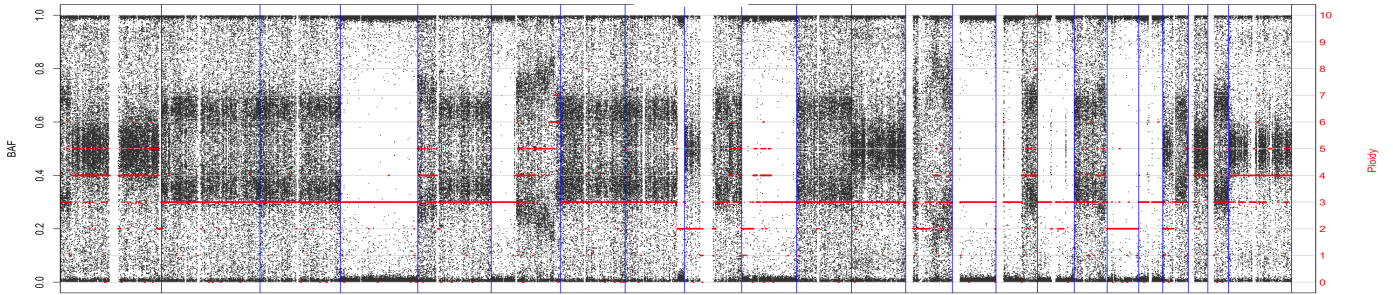

293S - SNParray, ploidy

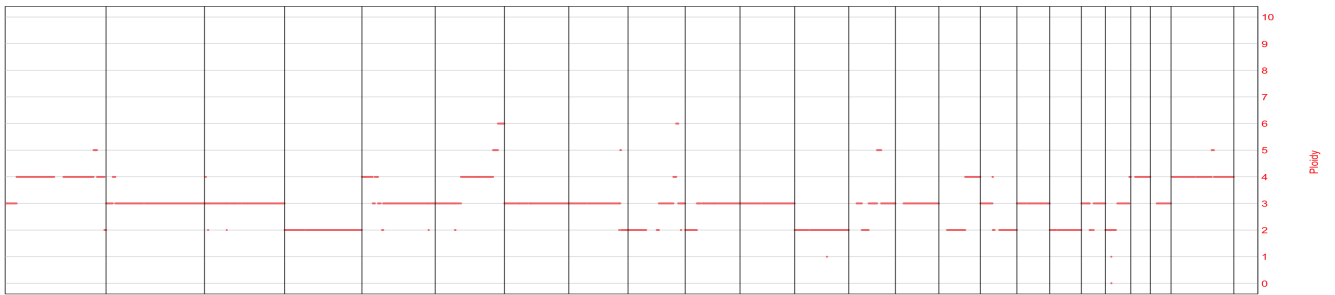

passed 5x,  
frozen,  
recovered

293S - SNParray, ploidy

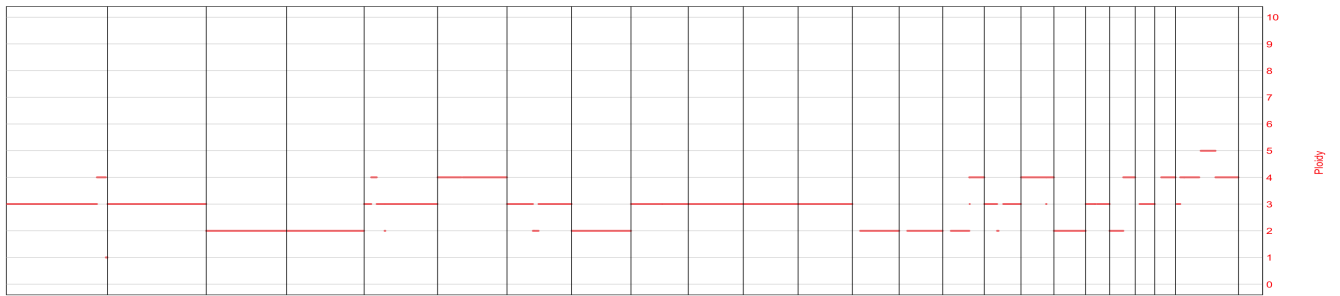

passed 4x

293S - SNParray, ploidy

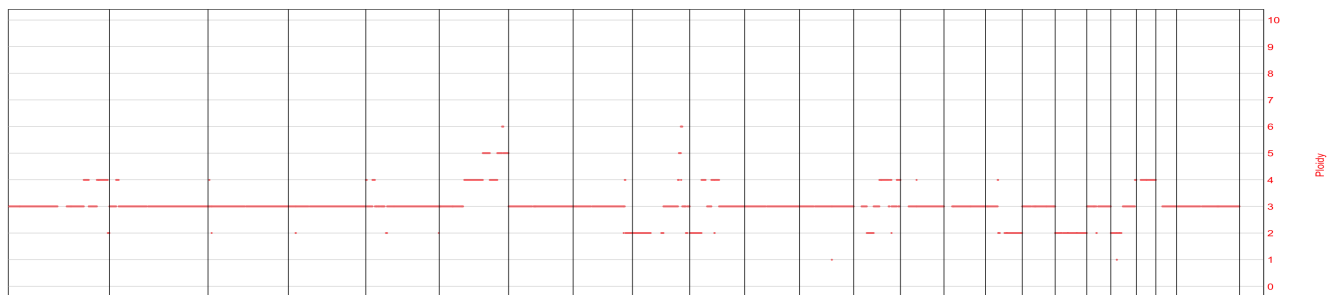



293SG - CG CNV

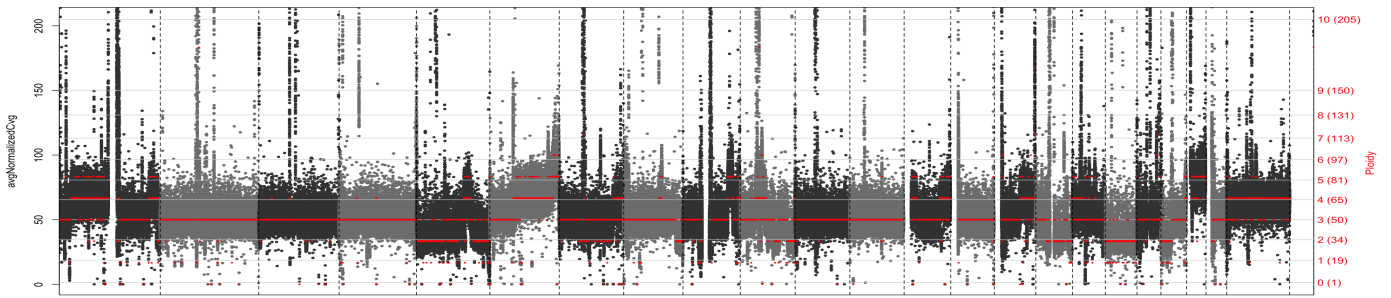

293SG - CG MAF

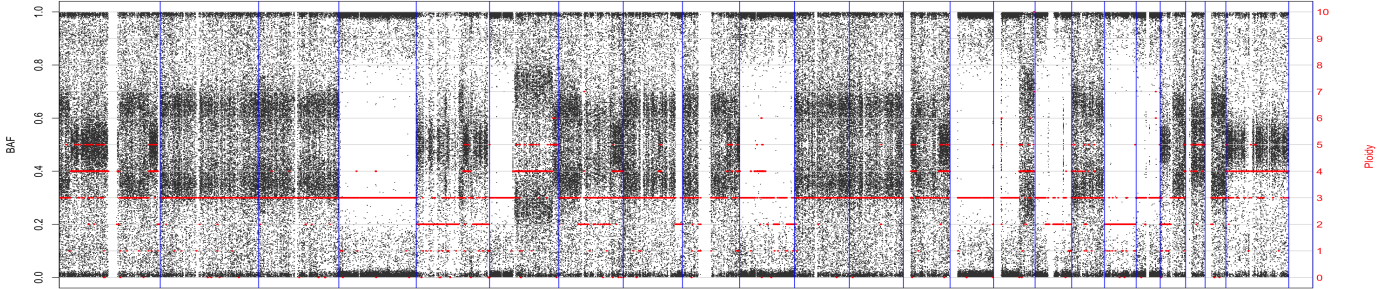

293SG - SNParray, ploidy

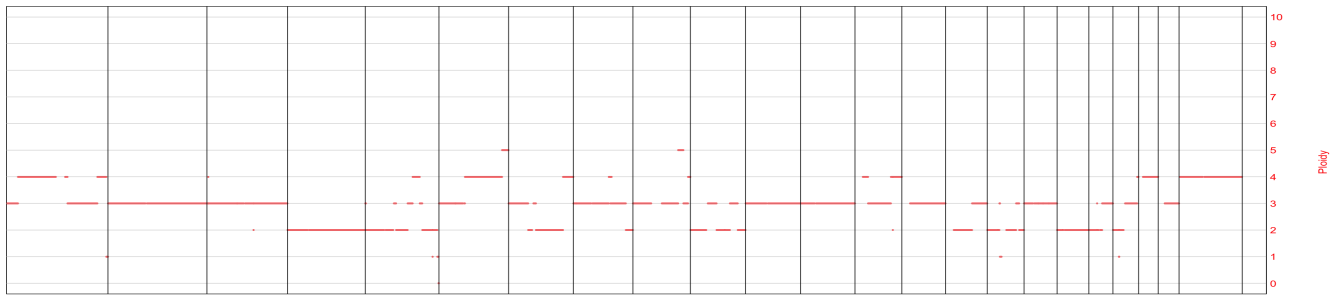

passed 6x,  
frozen,  
recovered

293SG - SNParray, ploidy

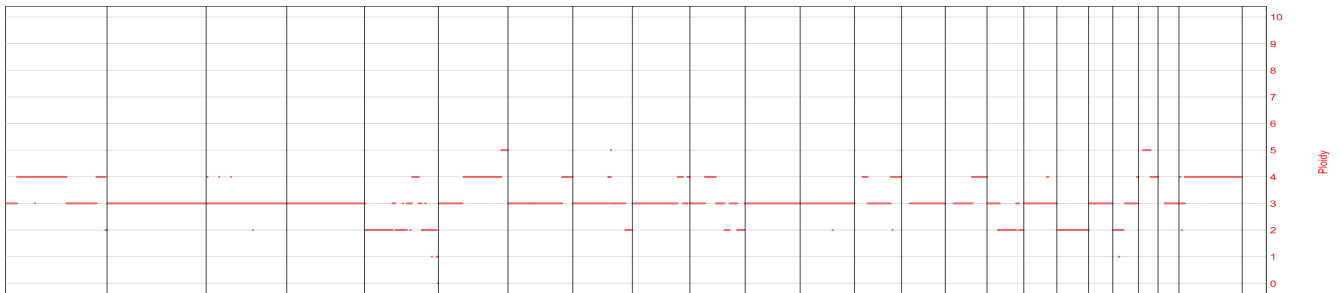

passed 3x

293SG - SNParray, ploidy

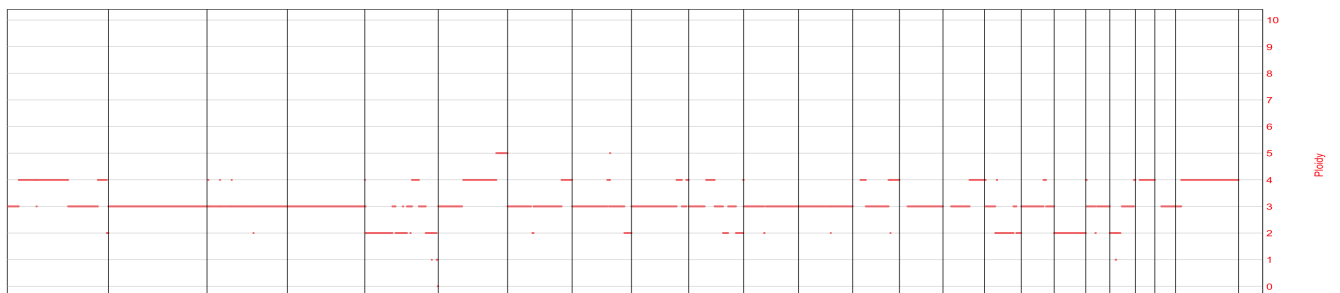

293SGGD - CG CNV

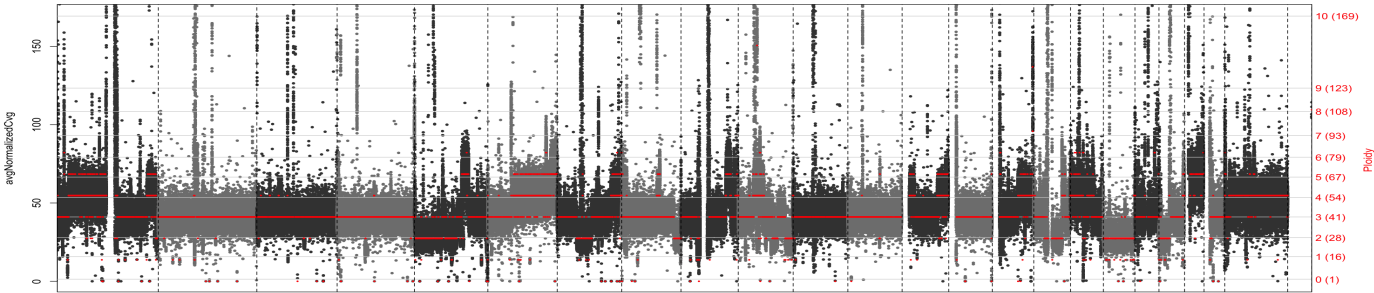

293SGGD - CG

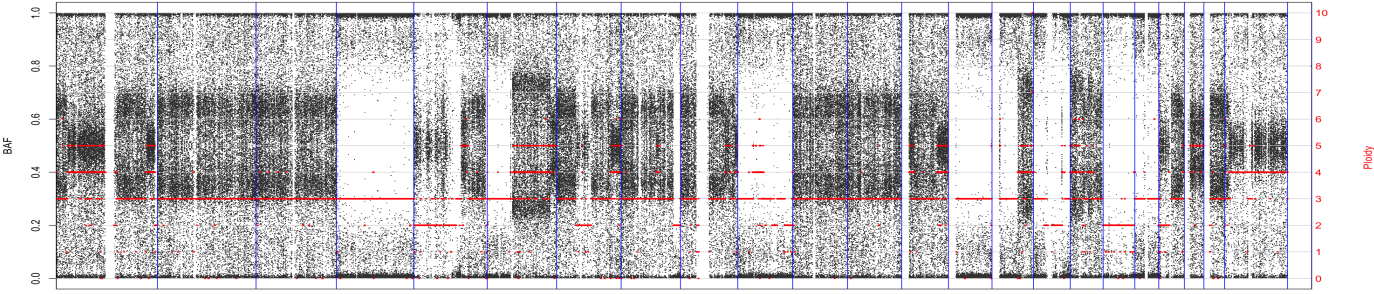

293SGGD - SNParray, ploidy

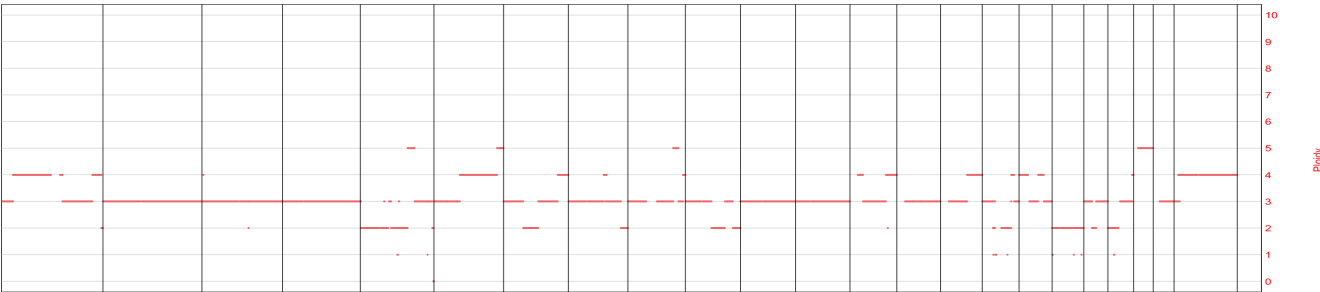

passed 3x,  
frozen,  
recovered

293SGGD - SNParray, ploidy

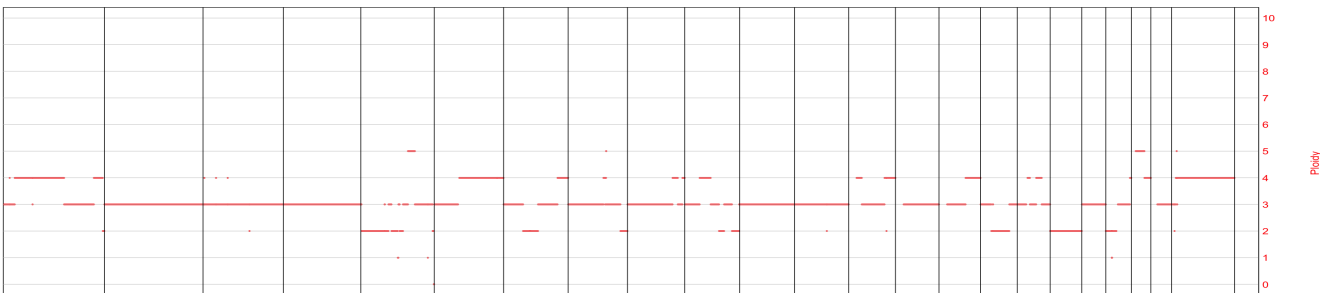

passed 3x

293SGGD - SNParray, ploidy

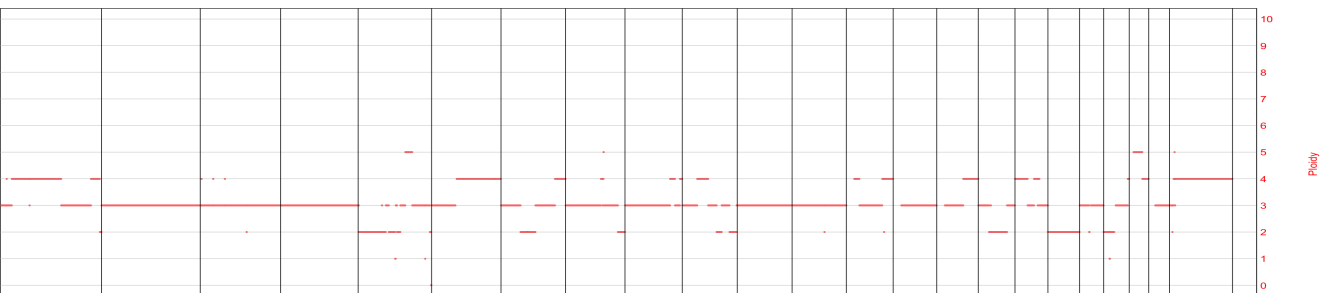

293T- CG CNV

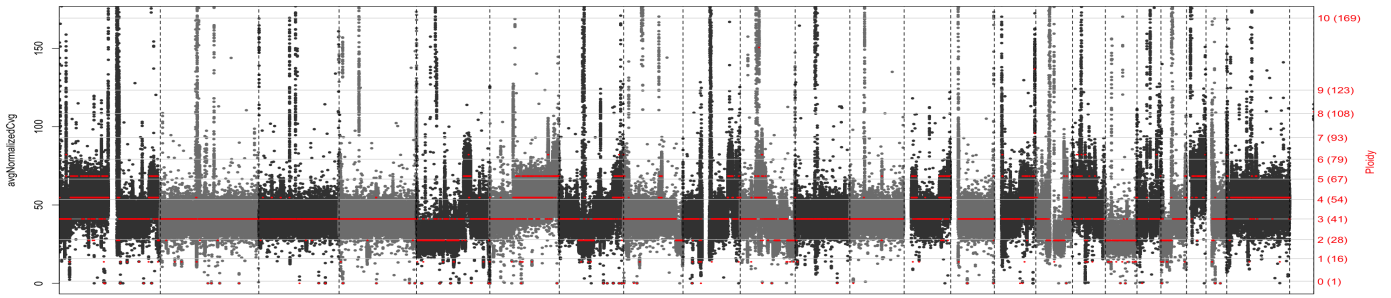

293T - CG MAF

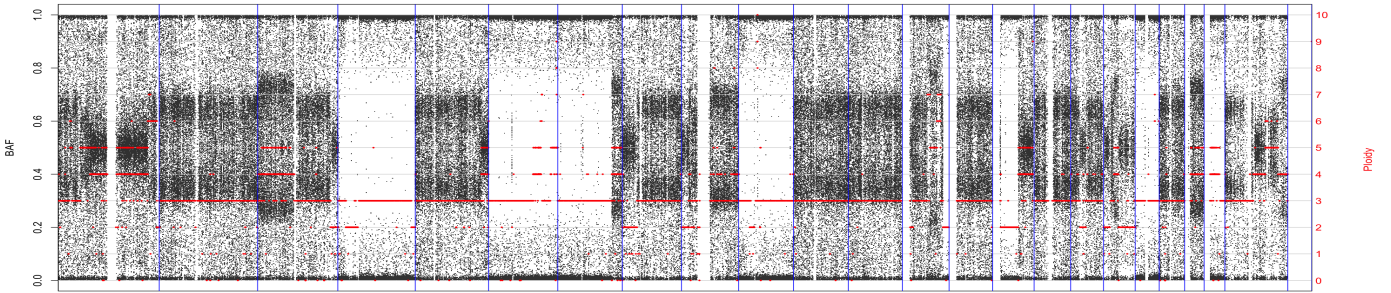

293T- SNParray, ploidy

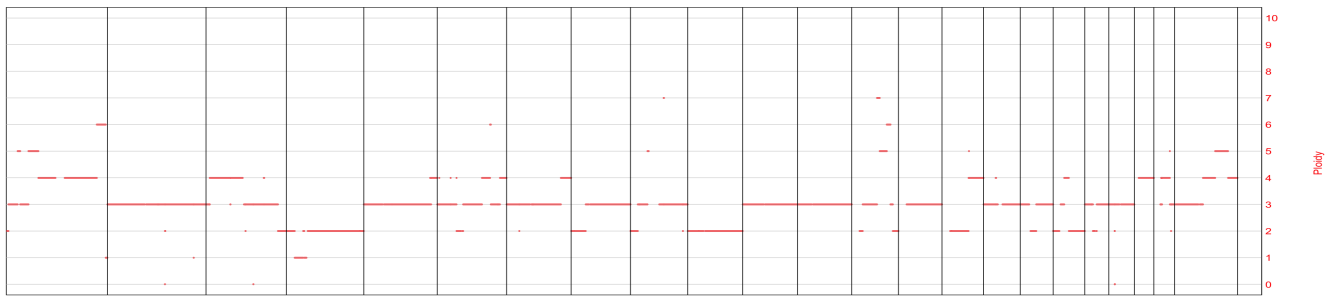

293T - CG, BAF

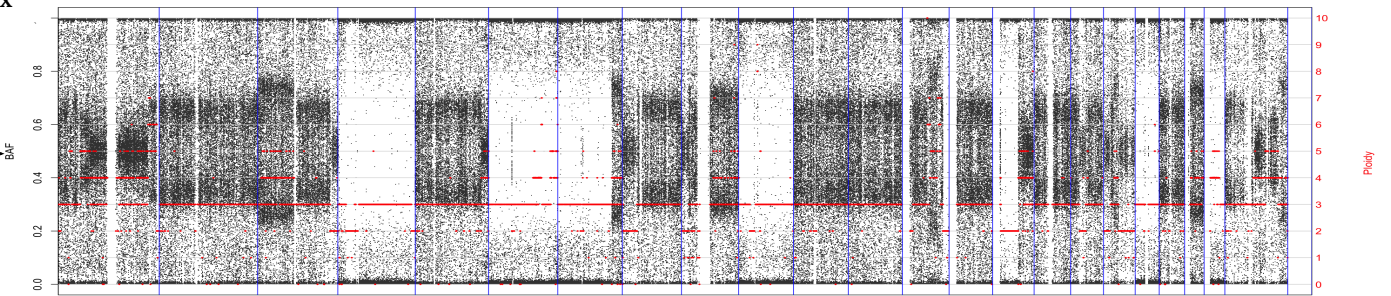

293T - SNParray, ploidy

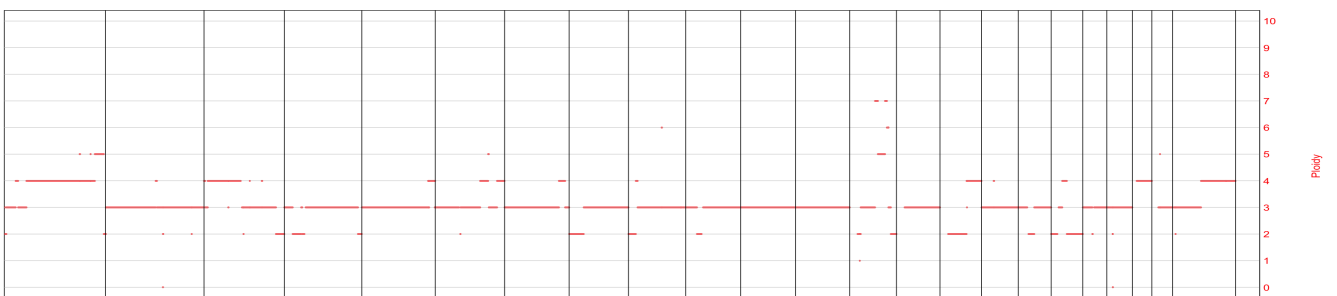

passed 4x,  
frozen,  
recovered,  
passed 3x

passed 5x
