# Supplementary figures and images for: Genome dynamics of the human embryonic kidney 293 lineage in response to cell biology manipulations
Source: PubMed Central journal article supplement — Nat Commun. 2014 Sep 3;5:4767. doi: 10.1038/ncomms5767 (PMC4166678; doi:10.1038/ncomms5767), 2014-09-03

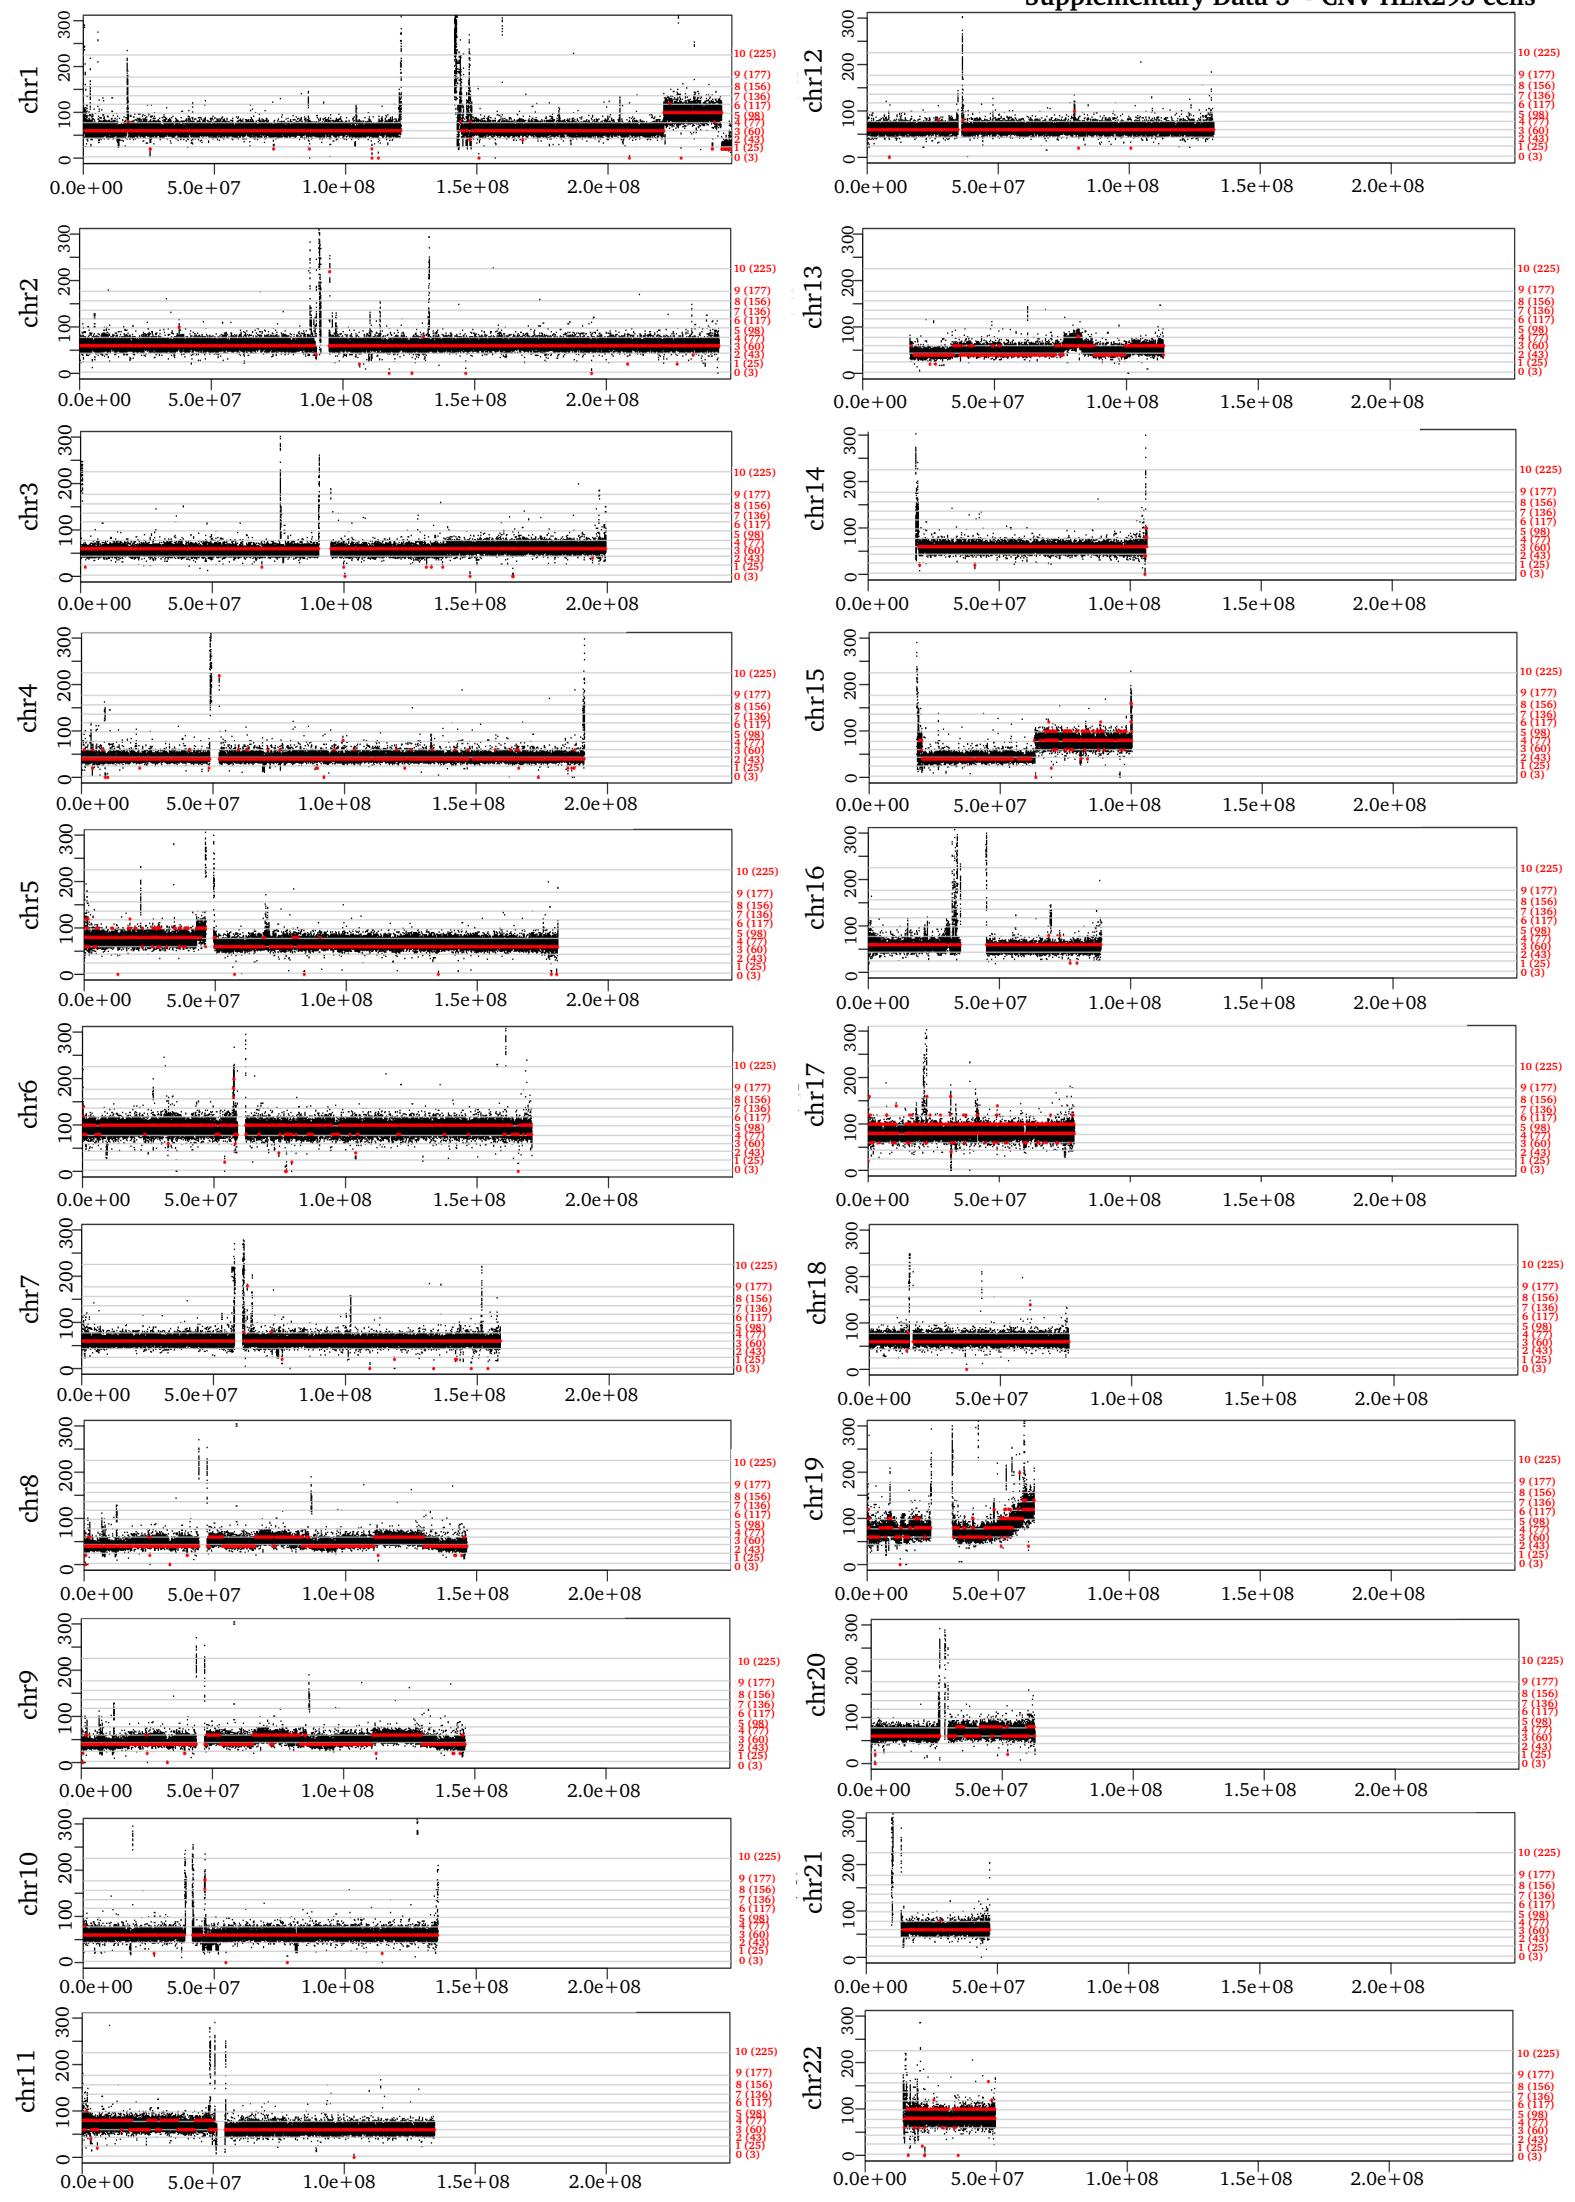

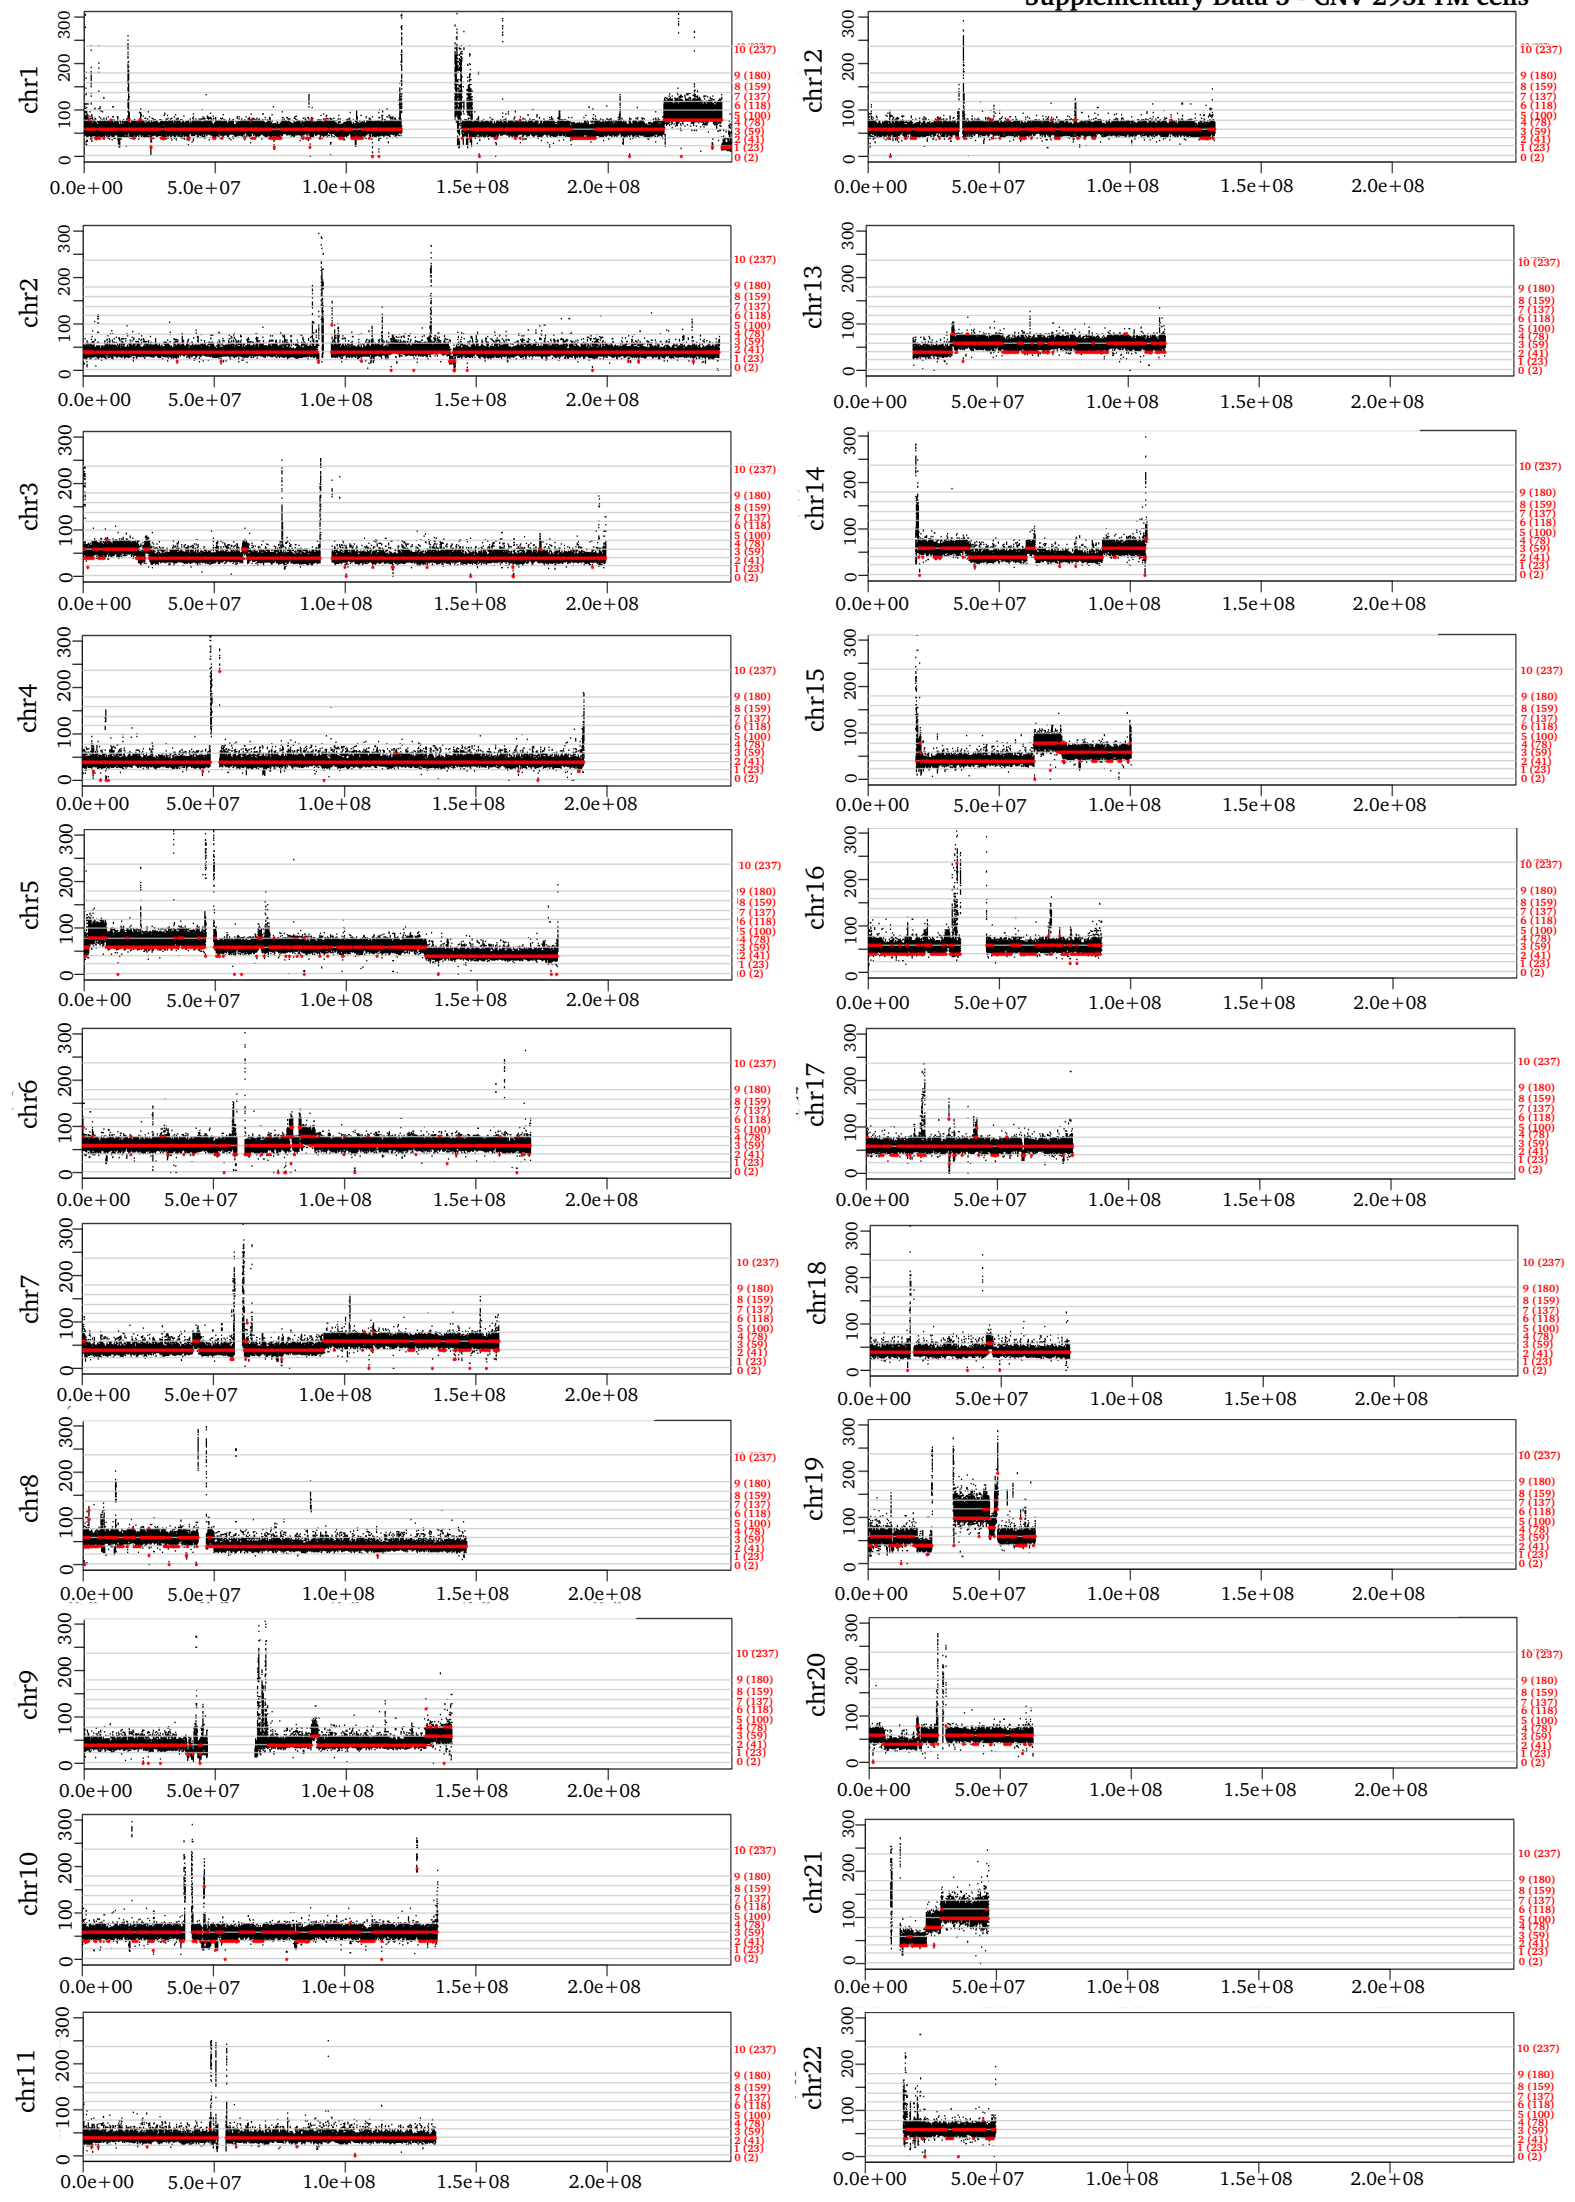

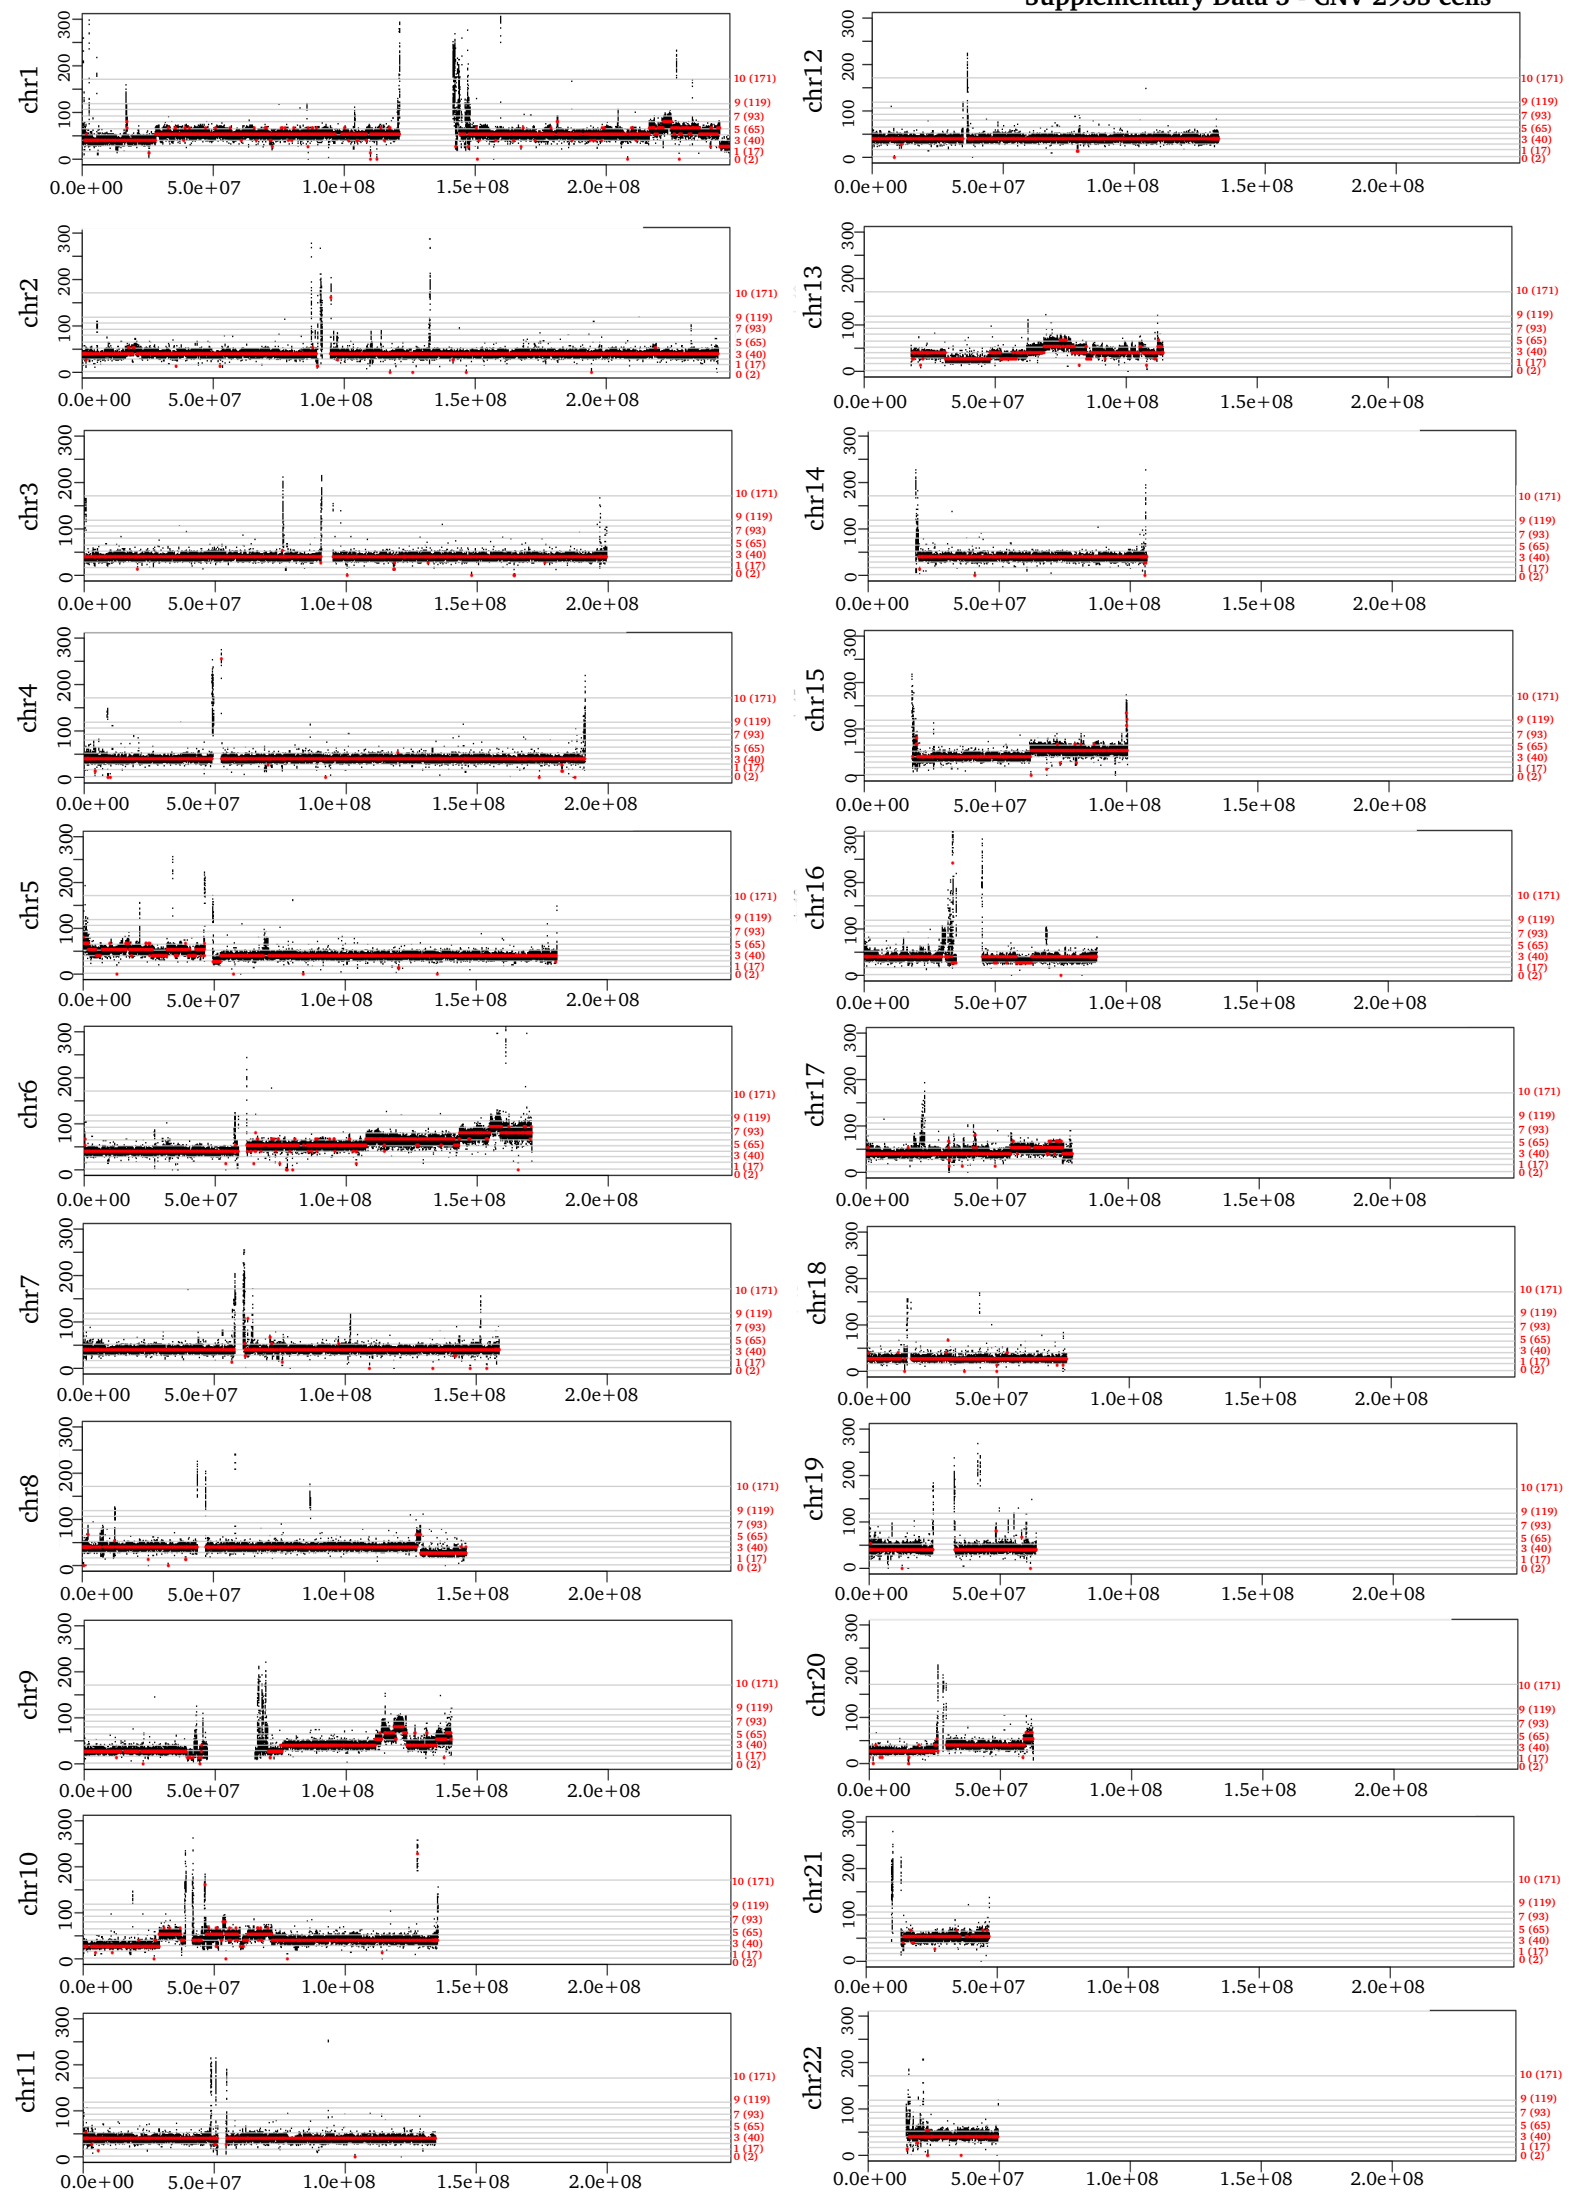

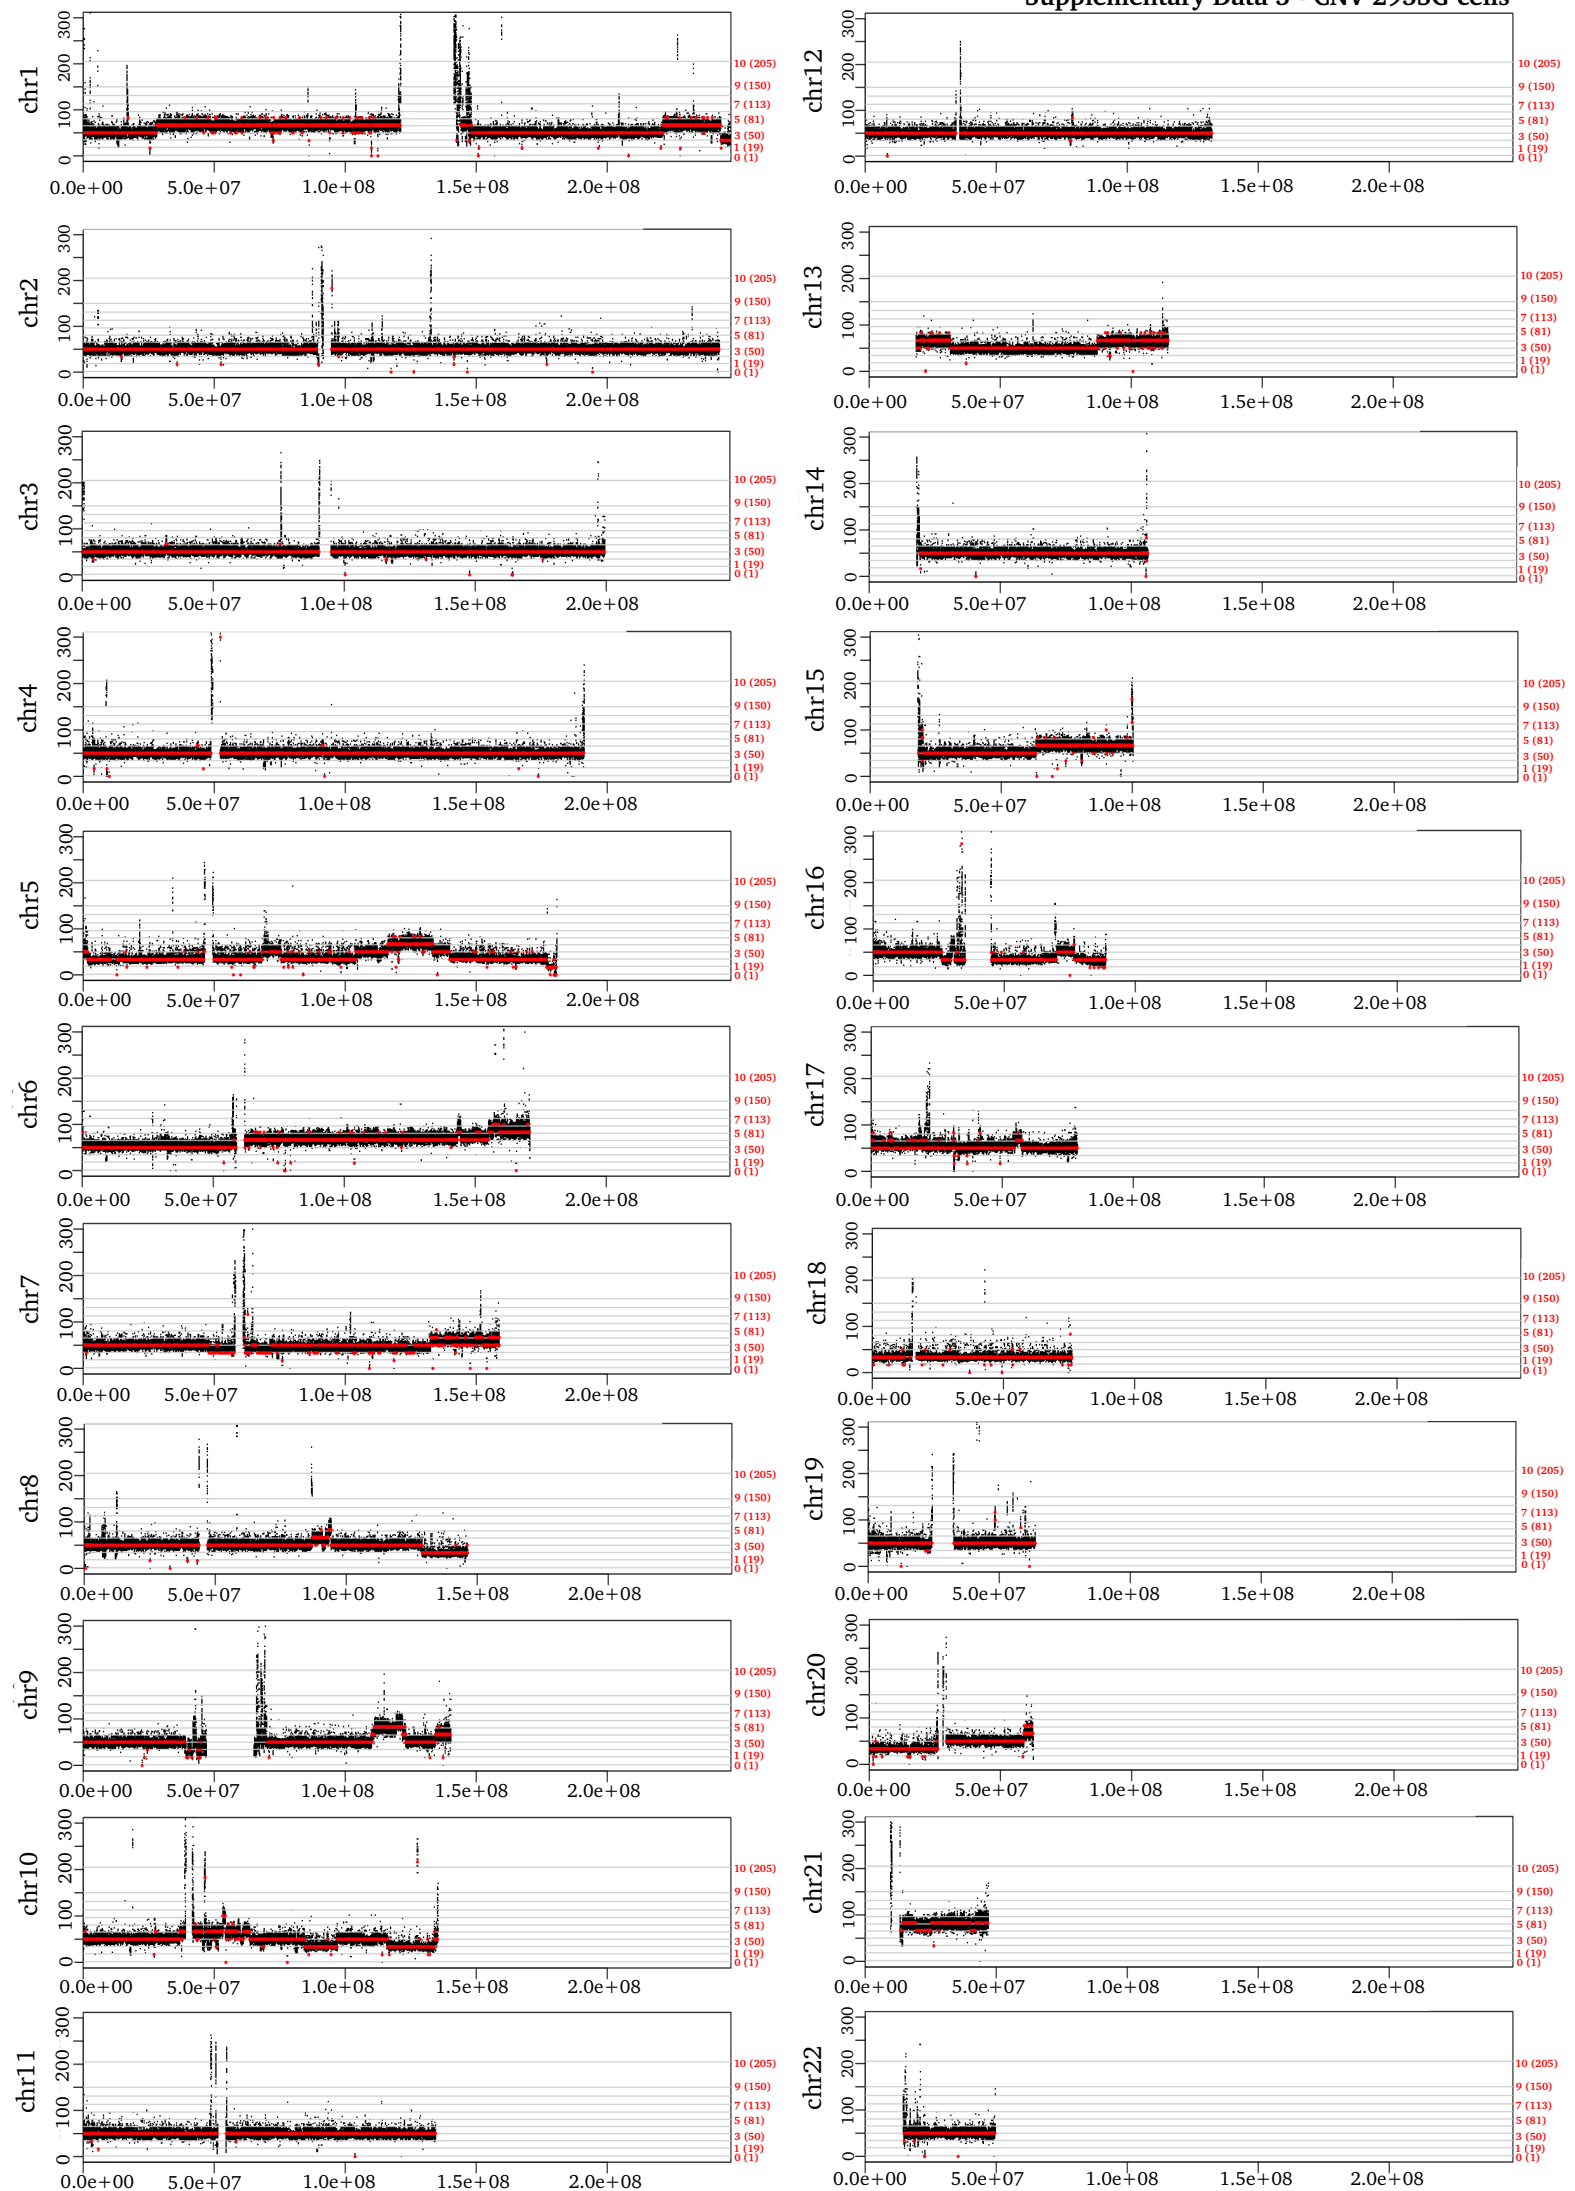

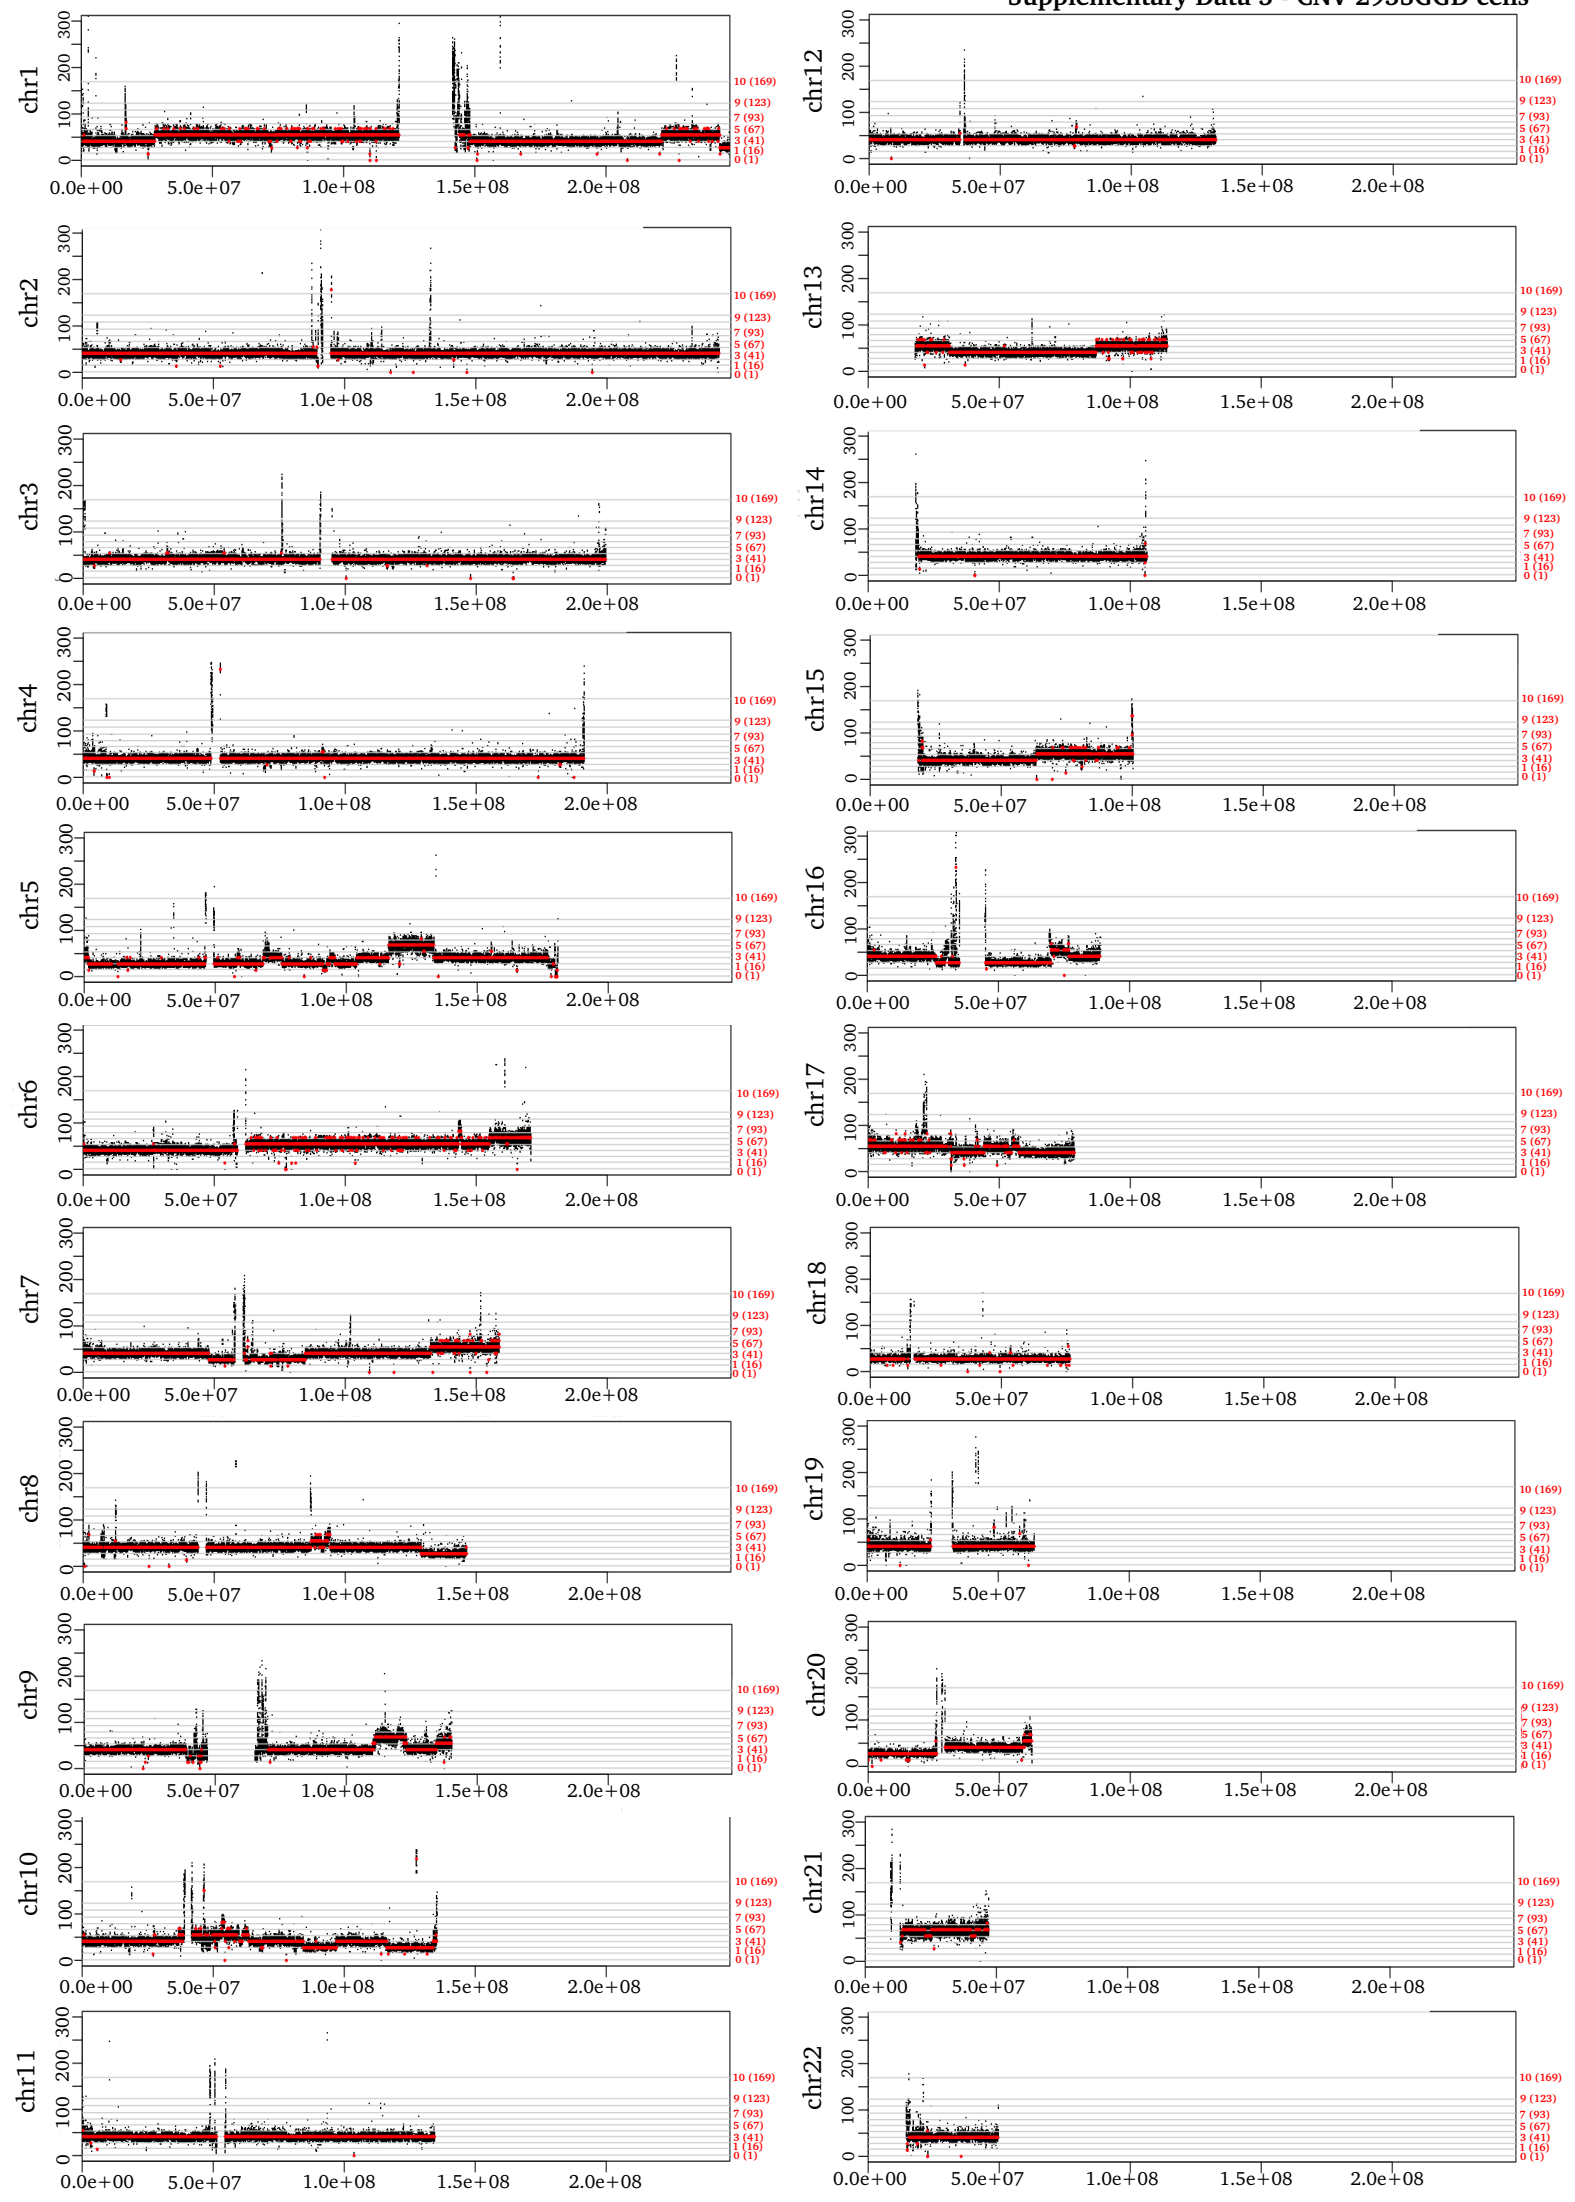

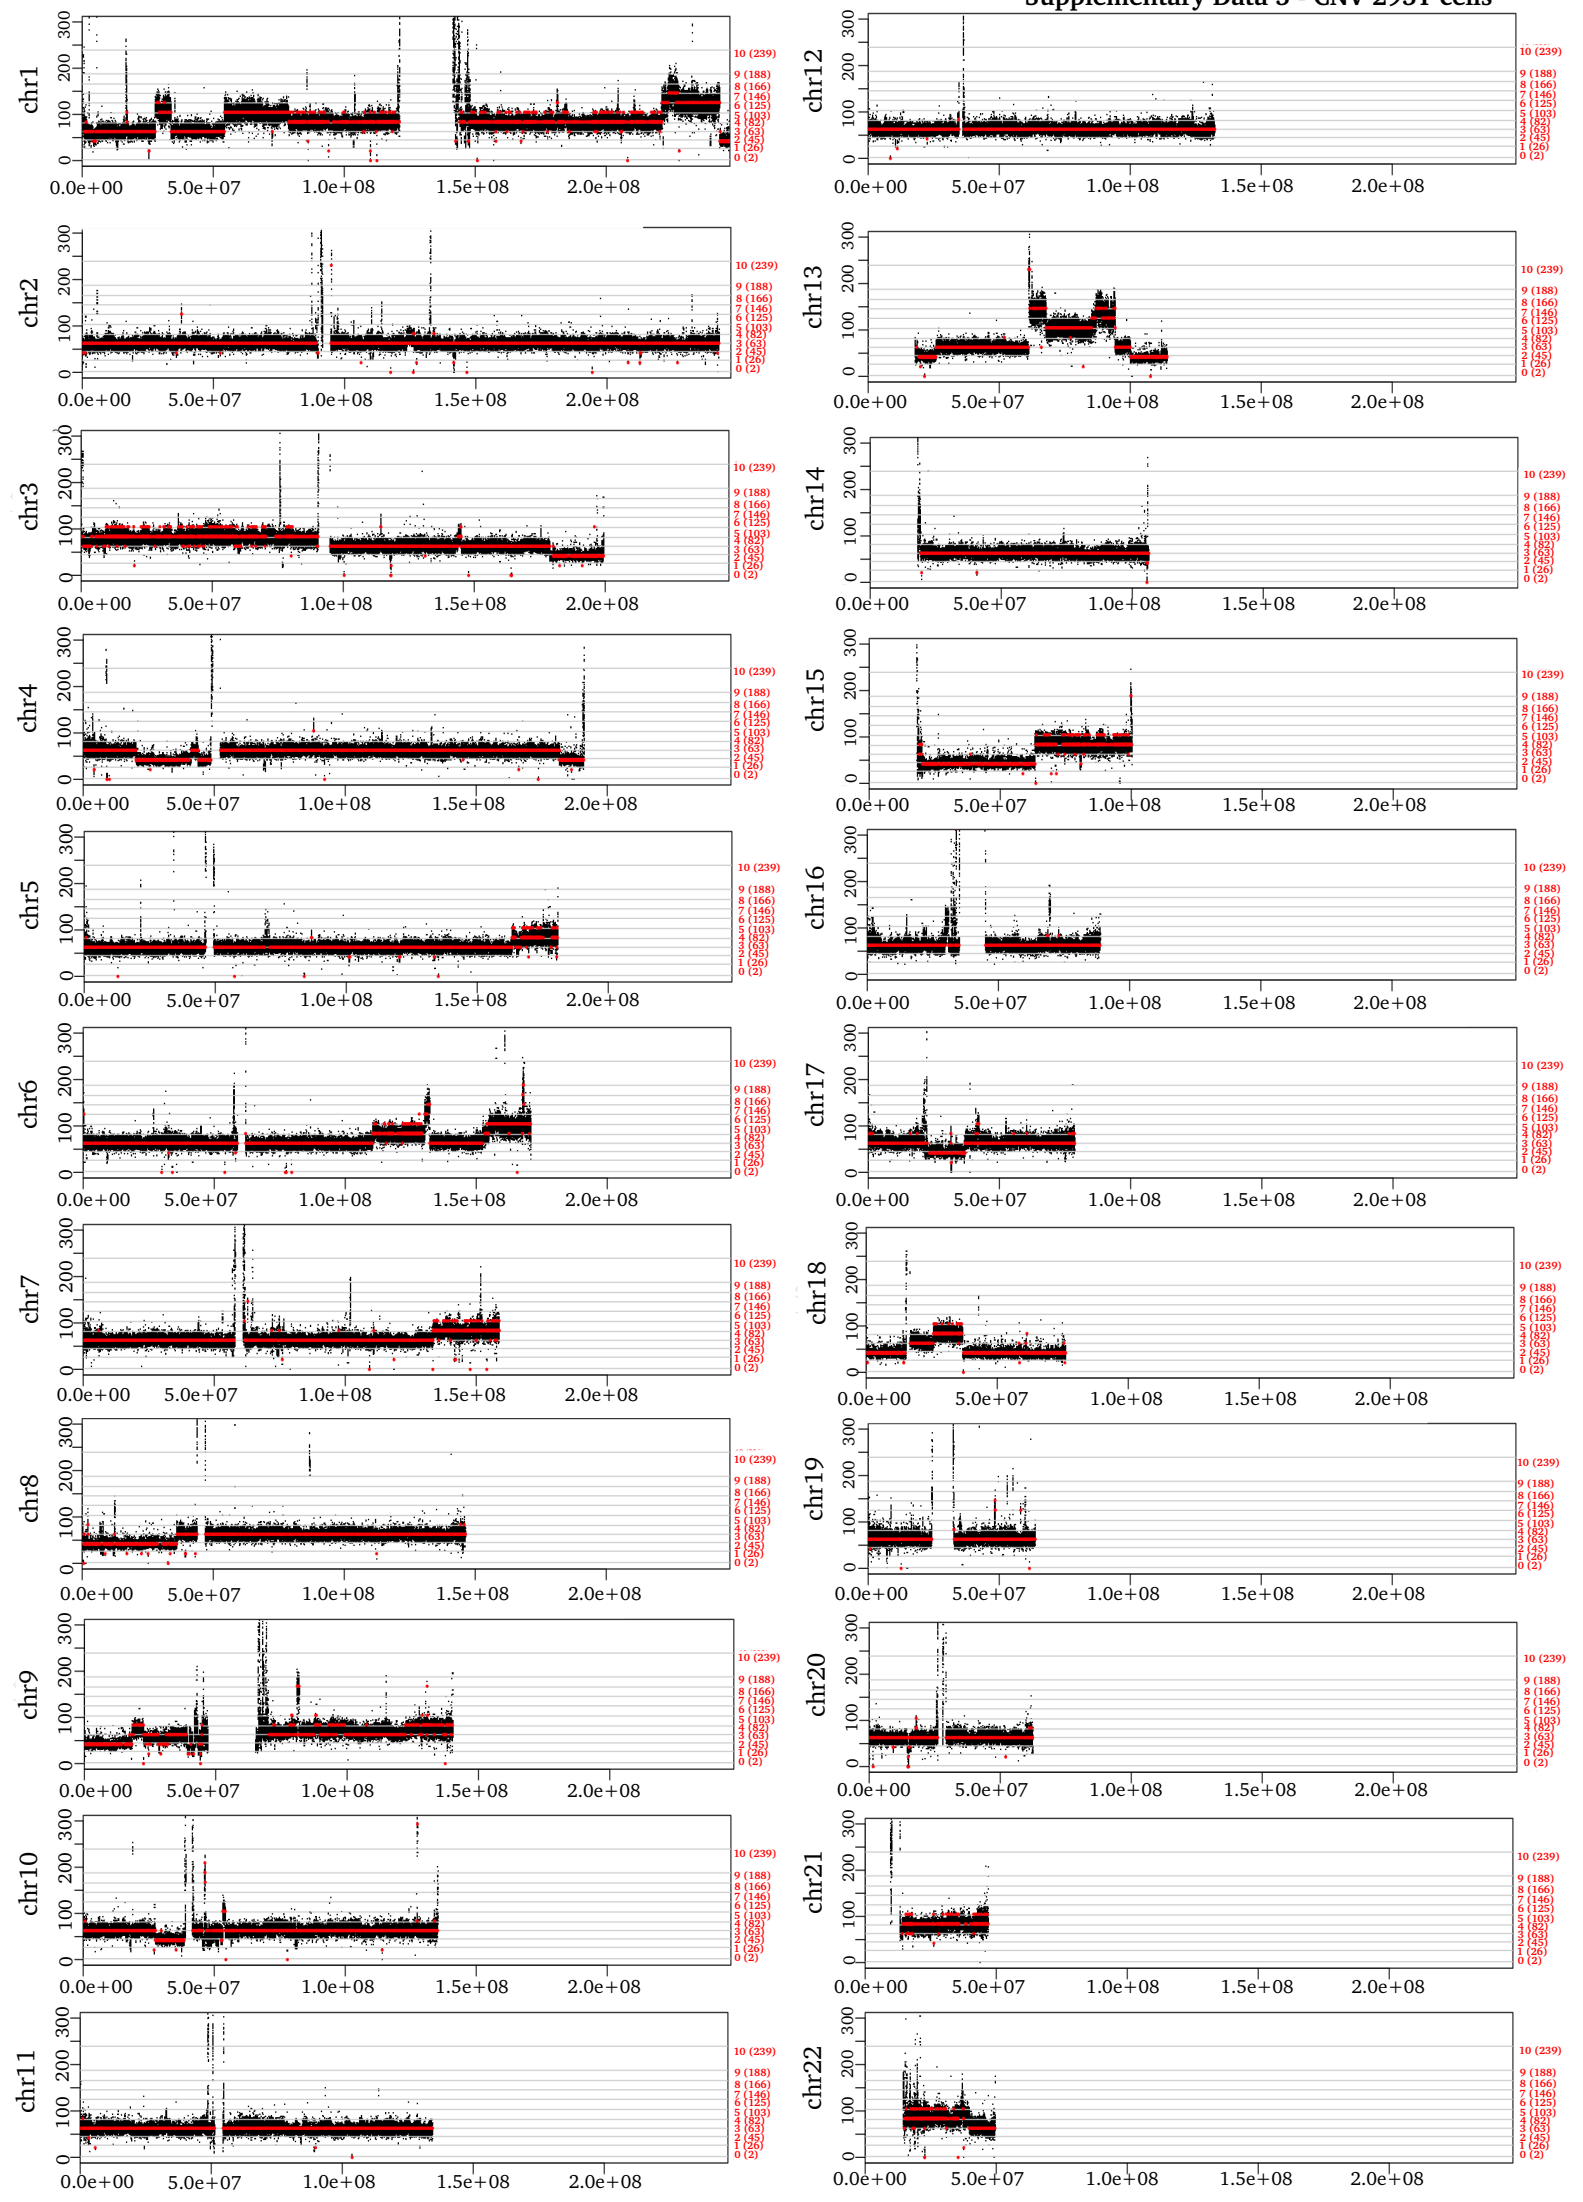

Supplement: ncomms5767-s4.pdf [file ncomms5767-s4.pdf]
